# Supplementary material for: Machine Learning-Based Diabetic Neuropathy and Previous Foot Ulceration Patients Detection Using Electromyography and Ground Reaction Forces during Gait
Source: MDPI journal article supplement (doi:10.3390/s22093507), 2022-05-05
Supplement: s1 [file s1]

supplementary

# Machine Learning-Based Diabetic Neuropathy and Previous Foot Ulceration Patients Detection Using Electromyography and Ground Reaction Forces during Gait

Fahmida Haque <sup>1</sup>, Mamun Bin Ibne Reaz <sup>1,\*</sup>, Muhammad Enamul Hoque Chowdhury <sup>2,\*</sup>, Maymouna Ezeddin <sup>2</sup>, Serkan Kiranyaz <sup>2</sup>, Mohammed Alhatou <sup>3,4</sup>, Sawal Hamid Md Ali <sup>1</sup>, Ahmad Ashrif A Bakar <sup>1</sup> and Geetika Srivastava <sup>5</sup>

<sup>1</sup> Department of Electrical, Electronic and System Engineering, Universiti Kebangsaan Malaysia, Bangi 43600, Malaysia; P97694@siswa.ukm.edu.my (F.H.); sawal@ukm.edu.my (S.H.M.A.); ashraf@ukm.edu.my (A.A.A.B.)

<sup>2</sup> Department of Electrical Engineering, Qatar University, Doha 2713, Qatar; me1511677@qu.edu.qa (M.E.); mkiranyaz@qu.edu.qa (S.K.)

<sup>3</sup> Neuromuscular Division, Hamad General Hospital, Doha 3050, Qatar; malhatou@hamad.qa

<sup>4</sup> Department of Neurology, Al khor Hospital Doha 3050, Qatar

<sup>5</sup> Department of Physics and Electronics, Dr. Ram Manohar Lohia Avadh University, Faizabad, Uttar Pradesh 224001 India; gsrivastava@rmlau.ac.in

\* Correspondence: mamun@ukm.edu.my (M.B.I.R.); mchowdhury@qu.edu.qa (M.E.H.C.)

**Table S1.** Data set summary after segmentation.

| Class name | Num. of subjects | Num. of trials | Num. GRF examples | Num. EMG examples |     |     |
|------------|------------------|----------------|-------------------|-------------------|-----|-----|
|            |                  |                |                   | LG                | TA  | VL  |
| Control    | 6                | 21             | 21                | 82                | 34  | 34  |
| Diabetics  | 6                | 21             | 21                | 84                | 84  | 84  |
| Ulcer      | 9                | 34             | 34                | 132               | 129 | 132 |
| Total      | 21               | 76             | 76                | 298               | 247 | 250 |

**Table S2.** Feature vectors summary for GRF.

|                                            |    |                                          |
|--------------------------------------------|----|------------------------------------------|
| TD<br>features<br>(no of<br>Feature<br>50) | 1  | 'Enhanced mean Absolute Value'           |
|                                            | 2  | 'Enhanced Wave form length'              |
|                                            | 3  | 'Mean absolute Value'                    |
|                                            | 4  | 'Wave form length'                       |
|                                            | 5  | 'Zero crossing'                          |
|                                            | 6  | 'Slope sign change'                      |
|                                            | 7  | 'RMS'                                    |
|                                            | 8  | 'Average amplitude change'               |
|                                            | 9  | Difference absolute standard deviation ' |
|                                            | 10 | 'Log detector'                           |
|                                            | 11 | 'Modified mean absolute value 1'         |
|                                            | 12 | 'Modified mean absolute value 2'         |
|                                            | 13 | 'Myopluse percentage rate'               |
|                                            | 14 | 'Simple square integral'                 |

|                                                              |    |                                           |
|--------------------------------------------------------------|----|-------------------------------------------|
|                                                              | 15 | 'Variance'                                |
|                                                              | 16 | 'Willison amplitude'                      |
|                                                              | 17 | 'Maximum Fractal length'                  |
|                                                              | 18 | 'Average power'                           |
|                                                              | 19 | 'Standard Deviation'                      |
|                                                              | 20 | 'Peak to Peak'                            |
|                                                              | 21 | 'Shape factor'                            |
|                                                              | 22 | 'Total Energy'                            |
|                                                              | 23 | 'Integrated absolute value'               |
|                                                              | 24 | Sqrt of Variance                          |
|                                                              | 25 | auto regressive 1'                        |
|                                                              | 26 | 'Auto regressive 2'                       |
|                                                              | 27 | 'Auto regressive 3'                       |
|                                                              | 28 | 'Auto regressive 4'                       |
|                                                              | 29 | 'Estimate (signal entropy)'               |
|                                                              | 30 | 'Sigma(signal entropy)'                   |
|                                                              | 31 | Descriptor SE Lower Bound                 |
|                                                              | 32 | Descriptor SE Upper Bound                 |
|                                                              | 33 | Descriptor SE NCELL                       |
|                                                              | 34 | Zero order moment                         |
|                                                              | 35 | Difference Between 0th & 2nd order moment |
|                                                              | 36 | Difference Between 0th & 4th order moment |
|                                                              | 37 | Sparseness                                |
|                                                              | 38 | Irregularity Factor                       |
|                                                              | 39 | Waveform length ratio                     |
|                                                              | 40 | 'Signal Kurtosis'                         |
|                                                              | 41 | 'Coefficient of variation'                |
|                                                              | 42 | 'Signal skewness'                         |
|                                                              | 43 | 'Mean'                                    |
|                                                              | 44 | 'First quantile'                          |
|                                                              | 45 | 'Third quantile'                          |
|                                                              | 46 | 'Quantile range'                          |
|                                                              | 47 | 'Max/min ratio'                           |
|                                                              | 48 | 'Final/min'                               |
|                                                              | 49 | 'Time to peak'                            |
|                                                              | 50 | 'Peak'                                    |
| Power spectral<br>FD<br>features<br>(no of<br>Feature<br>24) | 51 | 'Mean frequency '                         |
|                                                              | 52 | 'Median frequency '                       |
|                                                              | 53 | 'Spectral entropy'                        |
|                                                              | 54 | 'Max frequency'                           |
|                                                              | 55 | 'Max value '                              |
|                                                              | 56 | 'Max ratio'                               |
|                                                              | 57 | 'Powe spectral (PS) skewness'             |
|                                                              | 58 | 'PS kurtosis'                             |

|                                                                            |     |                                   |
|----------------------------------------------------------------------------|-----|-----------------------------------|
|                                                                            | 59  | 'PS mean frequency'               |
|                                                                            | 60  | 'PS median frequency'             |
|                                                                            | 61  | 'Signal to motion artifact ratio' |
|                                                                            | 62  | 'Max to min drop of PS'           |
|                                                                            | 63  | 'Signal to noise ratio '          |
|                                                                            | 64  | 'Spectral deformation '           |
|                                                                            | 65  | 'Spectral centroid'               |
|                                                                            | 66  | 'Spectral crest'                  |
|                                                                            | 67  | 'Spectral decrease'               |
|                                                                            | 68  | 'Spectral flatness'               |
|                                                                            | 69  | 'Spectral flux'                   |
|                                                                            | 70  | 'Spectral kurtosis'               |
|                                                                            | 71  | 'Spectral roll off point '        |
|                                                                            | 72  | 'Spectral skewness'               |
|                                                                            | 73  | 'Spectral slope'                  |
|                                                                            | 74  | 'Spectral spread'                 |
| TDF<br>features<br>using<br>DWT<br>techniques<br>(no of<br>Feature<br>121) | 75  | 'Band power of cD1'               |
|                                                                            | 76  | 'Band power of cD2'               |
|                                                                            | 77  | 'Band power of cD3'               |
|                                                                            | 78  | 'Band power of cD4'               |
|                                                                            | 79  | 'Band power of cD5'               |
|                                                                            | 80  | 'Band power of cD6'               |
|                                                                            | 81  | 'Band power of cD7'               |
|                                                                            | 82  | 'Band power of cD8'               |
|                                                                            | 83  | 'Band power of cA8'               |
|                                                                            | 84  | 'Band power of D1'                |
|                                                                            | 85  | 'Band power of D2'                |
|                                                                            | 86  | 'Band power of D3'                |
|                                                                            | 87  | 'Band power of D4'                |
|                                                                            | 88  | 'Band power of D5'                |
|                                                                            | 89  | 'Band power of D6'                |
|                                                                            | 90  | 'Band power of D7'                |
|                                                                            | 91  | 'Band power of D8'                |
|                                                                            | 92  | 'Band power of A6'                |
|                                                                            | 93  | 'Band power of A8'                |
|                                                                            | 94  | 'Mean absolute value cD1'         |
|                                                                            | 95  | 'Mean absolute value cD2'         |
|                                                                            | 96  | 'Mean absolute value cD3'         |
|                                                                            | 97  | 'Mean absolute value cD4'         |
|                                                                            | 98  | 'Mean absolute value cD5'         |
|                                                                            | 99  | 'Mean absolute value cD6'         |
|                                                                            | 100 | 'Mean absolute value cD7'         |
|                                                                            | 101 | 'Mean absolute value cD8'         |
|                                                                            | 102 | 'Mean absolute value cA8'         |

---

|     |                          |
|-----|--------------------------|
| 103 | 'Mean absolute value D1' |
| 104 | 'Mean absolute value D2' |
| 105 | 'Mean absolute value D3' |
| 106 | 'Mean absolute value D4' |
| 107 | 'Mean absolute value D5' |
| 108 | 'Mean absolute value D6' |
| 109 | 'Mean absolute Value D7' |
| 110 | 'Mean absolute value D8' |
| 111 | 'Mean absolute value A6' |
| 112 | 'Mean absolute value A8' |
| 113 | 'Waveform length cD1'    |
| 114 | 'Waveform length cD2'    |
| 115 | 'Waveform length cD3'    |
| 116 | 'Waveform length cD4'    |
| 117 | 'Waveform length cD5'    |
| 118 | 'Waveform length cD6'    |
| 119 | 'Waveform length cD7'    |
| 120 | 'Waveform length cD8'    |
| 121 | 'Waveform length cA8'    |
| 122 | 'Waveform length D1'     |
| 123 | 'Waveform length D2'     |
| 124 | 'Waveform length D3'     |
| 125 | 'Waveform length D4'     |
| 126 | 'Waveform length D5'     |
| 127 | 'Waveform length D6'     |
| 128 | 'Waveform length D7'     |
| 129 | 'Waveform length D8'     |
| 130 | 'Waveform length A6'     |
| 131 | 'Waveform length A8'     |
| 132 | 'RMS cD1'                |
| 133 | 'RMS cD2'                |
| 134 | 'RMS cD3'                |
| 135 | 'RMS cD4'                |
| 136 | 'RMS cD5'                |
| 137 | 'RMS cD6'                |
| 138 | 'RMS cD7'                |
| 139 | 'RMS cD8'                |
| 140 | 'RMS cA8'                |
| 141 | 'RMS D1'                 |
| 142 | 'RMS D2'                 |
| 143 | 'RMS D3'                 |
| 144 | 'RMS D4'                 |
| 145 | 'RMS D5'                 |
| 146 | 'RMS D6'                 |
| 147 | 'RMS D7'                 |

---

---

|     |                           |
|-----|---------------------------|
| 148 | 'RMS D8'                  |
| 149 | 'RMS A6'                  |
| 150 | 'RMS A8'                  |
| 151 | 'Standard Deviation cD1'  |
| 152 | 'Standard Deviation cD2'  |
| 153 | 'Standard Deviation cD3'  |
| 154 | 'Standard Deviation cD4'  |
| 155 | 'Standard Deviation cD5'  |
| 156 | 'Standard Deviation cD6'  |
| 157 | 'Standard Deviation cD7'  |
| 158 | 'Standard Deviation cD8'  |
| 159 | 'Standard Deviation cA8'  |
| 160 | 'Standard Deviation D1'   |
| 161 | 'Standard Deviation D2'   |
| 162 | 'Standard Deviation D3'   |
| 163 | 'Standard Deviation D4'   |
| 164 | 'Standard Deviation D5'   |
| 165 | 'Standard Deviation D6'   |
| 166 | 'Standard Deviation D7'   |
| 167 | 'Standard Deviation D8'   |
| 168 | 'Standard Deviation A6'   |
| 169 | 'Standard Deviation A8'   |
| 170 | 'Max Fractal length cD1'  |
| 171 | 'Max Fractal length cD2'  |
| 172 | 'Max Fractal length cD3'  |
| 173 | 'Max Fractal length cD4'  |
| 174 | 'Max Fractal length cD5'  |
| 175 | 'Max Fractal length cD6'  |
| 176 | 'Max Fractal length cD7'  |
| 177 | 'Max Fractal length cD8'  |
| 178 | 'Max Fractal length cA8'  |
| 179 | 'Max Fractal length D1'   |
| 180 | 'Max Fractal length D2'   |
| 181 | 'Max Fractal length D3'   |
| 182 | 'Max Fractal length D4'   |
| 183 | 'Max Fractal length D5'   |
| 184 | 'Max Fractal length D6'   |
| 185 | 'Max Fractal length D7'   |
| 186 | 'Max Fractal length D8'   |
| 187 | 'Max Fractal length A6'   |
| 188 | 'Max Fractal length A8'   |
| 189 | 'Wavelet entropy level 8' |
| 190 | 'Wavelet entropy level 6' |
| 191 | 'Wavelet entropy level 4' |
| 192 | First peak                |

---

|     |                    |
|-----|--------------------|
| 193 | Second peak        |
| 194 | LOC of first peak  |
| 195 | LOC of second peak |

**Table S3.** Feature list from different Selection Techniques from GL muscle EMG.

| Ranking | Chi Square             | mrmr                   | relieff                | fscnca                 |
|---------|------------------------|------------------------|------------------------|------------------------|
| 1       | 'GL AR1'               | 'GL waveform length'   | 'GL NSV'               | 'GL skewness'          |
| 2       | 'GL waveform length'   | 'GL AR1'               | 'GL waveform length'   | 'GL waveform length'   |
| 3       | 'GL mobility'          | 'GL slope sign change' | 'GL mobility'          | 'GL slope sign change' |
| 4       | 'GL NSV'               | 'GL skewness'          | 'GL AR1'               | 'GL zero crossings'    |
| 5       | 'GL complexity'        | 'GL NSV'               | 'GL complexity'        | 'GL Wilson amplitude'  |
| 6       | 'GL Wilson amplitude'  | 'GL zero crossings'    | 'GL zero crossings'    | 'GL AR2'               |
| 7       | 'GL AR2'               | 'GL Wilson amplitude'  | 'GL slope sign change' | 'GL mobility'          |
| 8       | 'GL skewness'          | 'GL mobility'          | 'GL AR3'               | 'GL AR1'               |
| 9       | 'GL zero crossings'    | 'GL complexity'        | 'GL Wilson amplitude'  | 'GL AR3'               |
| 10      | 'GL slope sign change' | 'GL AR2'               | 'GL AR2'               | 'GL complexity'        |
| 11      | 'GL AR3'               | 'GL AR3'               | 'GL skewness'          | 'GL NSV'               |

**Table S4.** Feature list from different Selection Techniques from VL muscle EMG.

| Ranking | Chi Square             | mrmr                   | relieff                | fscnca                 |
|---------|------------------------|------------------------|------------------------|------------------------|
| 1       | 'TA NSV'               | 'TA NSV'               | 'TA NSV'               | 'TA waveform length'   |
| 2       | 'TA slope sign change' | 'TA AR3'               | 'TA waveform length'   | 'TA zero crossings'    |
| 3       | 'TA waveform length'   | 'TA AR1'               | 'TA Wilson amplitude'  | 'TA Wilson amplitude'  |
| 4       | 'TA zero crossings'    | 'TA slope sign change' | 'TA AR1'               | 'TA slope sign change' |
| 5       | 'TA Wilson amplitude'  | 'TA waveform length'   | 'TA mobility'          | 'TA mobility'          |
| 6       | 'TA skewness'          | 'TA complexity'        | 'TA slope sign change' | 'TA AR2'               |
| 7       | 'TA AR1'               | 'TA mobility'          | 'TA complexity'        | 'TA AR3'               |
| 8       | 'TA AR3'               | 'TA zero crossings'    | 'TA skewness'          | 'TA NSV'               |
| 9       | 'TA AR2'               | 'TA skewness'          | 'TA zero crossings'    | 'TA AR1'               |
| 10      | 'TA mobility'          | 'TA Wilson amplitude'  | 'TA AR2'               | 'TA complexity'        |
| 11      | 'TA complexity'        | 'TA AR2'               | 'TA AR3'               | 'TA skewness'          |

**Table S5.** Feature list from different Selection Techniques from TA muscle EMG.

| Ranking | Chi Square             | mrmr                   | relieff                | fscnca                 |
|---------|------------------------|------------------------|------------------------|------------------------|
| 1       | 'VL waveform length'   | 'VL waveform length'   | 'VL complexity'        | 'VL zero crossings'    |
| 2       | 'VL NSV'               | 'VL slope sign change' | 'VL waveform length'   | 'VL waveform length'   |
| 3       | 'VL Wilson amplitude'  | 'VL AR3'               | 'VL NSV'               | 'VL slope sign change' |
| 4       | 'VL AR2'               | 'VL Wilson amplitude'  | 'VL mobility'          | 'VL Wilson amplitude'  |
| 5       | 'VL AR3'               | 'VL NSV'               | 'VL AR1'               | 'VL mobility'          |
| 6       | 'VL zero crossings'    | 'VL zero crossings'    | 'VL AR3'               | 'VL skewness'          |
| 7       | 'VL mobility'          | 'VL skewness'          | 'VL AR2'               | 'VL AR3'               |
| 8       | 'VL skewness'          | 'VL mobility'          | 'VL slope sign change' | 'VL AR1'               |
| 9       | 'VL slope sign change' | 'VL complexity'        | 'VL zero crossings'    | 'VL AR2'               |
| 10      | 'VL complexity'        | 'VL AR1'               | 'VL Wilson amplitude'  | 'VL NSV'               |
| 11      | 'VL AR1'               | 'VL AR2'               | 'VL skewness'          | 'VL complexity'        |

**Table S6.** Feature list from different Selection Techniques from GL-VL muscles EMG.

| Ranking | Chi Square | mrmr | relieff | fscnca |
|---------|------------|------|---------|--------|
|---------|------------|------|---------|--------|

|    |                         |                         |                         |                          |
|----|-------------------------|-------------------------|-------------------------|--------------------------|
| 1  | 'GL Zero Order Moment'  | 'VL Sixth Order Moment' | 'GL AR2'                | 'GL waveform length'     |
| 2  | 'VL Sixth Order Moment' | 'GL Amplitude change 2' | 'GL AR1'                | 'VL waveform length'     |
| 3  | 'GL Amplitude change 2' | 'GL AR2'                | 'VL complexity'         | 'GL Wilson amplitude'    |
| 4  | 'GL AR2'                | 'VL slope sign change'  | 'GL Amplitude change 2' | 'GL slope sign change'   |
| 5  | 'GL waveform length'    | 'GL skewness'           | 'VL AR3'                | 'VL zero crossings'      |
| 6  | 'VL waveform length'    | 'GL slope sign change'  | 'GL NSV'                | 'GL zero crossings'      |
| 7  | 'GL mobility'           | 'GL LMAV'               | 'VL AR4'                | 'VL Wilson amplitude'    |
| 8  | 'VL LMAV'               | 'VL Zero Order Moment'  | 'VL AR1'                | 'VL skewness'            |
| 9  | 'VL Wilson amplitude'   | 'VL Wilson amplitude'   | 'GL complexity'         | 'GL Sixth Order Moment'  |
| 10 | 'VL AR3'                | 'VL AR4'                | 'VL Wilson amplitude'   | 'GL Zero Order Moment'   |
| 11 | 'VL AR4'                | 'GL waveform length'    | 'GL waveform length'    | 'VL Fourth Order Moment' |
| 12 | 'GL complexity'         | 'VL waveform length'    | 'VL zero crossings'     | 'GL AR2'                 |
| 13 | 'GL Wilson amplitude'   | 'GL AR1'                | 'VL Zero Order Moment'  | 'GL skewness'            |
| 14 | 'GL AR3'                | 'VL zero crossings'     | 'VL Sixth Order Moment' | 'GL AR4'                 |
| 15 | 'VL zero crossings'     | 'GL zero crossings'     | 'VL slope sign change'  | 'GL AR3'                 |
| 16 | 'VL AR1'                | 'GL Wilson amplitude'   | 'GL zero crossings'     | 'VL NSV'                 |
| 17 | 'GL skewness'           | 'GL complexity'         | 'GL AR4'                | 'VL complexity'          |
| 18 | 'GL zero crossings'     | 'GL AR3'                | 'VL AR2'                | 'VL AR2'                 |
| 19 | 'GL slope sign change'  | 'GL AR4'                | 'GL Wilson amplitude'   | 'VL AR4'                 |
| 20 | 'VL skewness'           | 'VL skewness'           | 'GL AR3'                | 'GL mobility'            |
| 21 | 'VL slope sign change'  | 'VL mobility'           | 'VL skewness'           | 'VL mobility'            |
| 22 | 'VL complexity'         | 'VL complexity'         | 'GL slope sign change'  | 'GL complexity'          |
| 23 | 'GL AR4'                | 'VL AR2'                | 'GL skewness'           | 'VL AR3'                 |
| 24 | 'VL AR2'                | 'VL AR3'                |                         | 'VL slope sign change'   |

Table S7. Feature list from different Selection Techniques from GL-TA muscles EMG.

| Ranking | Chi Square              | mrmr                    | relieff                 | fscnca                  |
|---------|-------------------------|-------------------------|-------------------------|-------------------------|
| 1       | 'TA Zero Order Moment'  | 'TA LMAV'               | 'TA Sixth Order Moment' | 'GL waveform length'    |
| 2       | 'GL Zero Order Moment'  | 'GL Amplitude change 2' | 'TA AR1'                | 'TA waveform length'    |
| 3       | 'GL Amplitude change 2' | 'GL AR2'                | 'TA Wilson amplitude'   | 'TA slope sign change'  |
| 4       | 'GL AR2'                | 'TA AR4'                | 'TA complexity'         | 'TA zero crossings'     |
| 5       | 'TA slope sign change'  | 'GL skewness'           | 'TA AR2'                | 'TA Wilson amplitude'   |
| 6       | 'GL waveform length'    | 'TA complexity'         | 'TA slope sign change'  | 'GL slope sign change'  |
| 7       | 'TA zero crossings'     | 'GL slope sign change'  | 'GL Sixth Order Moment' | 'GL skewness'           |
| 8       | 'TA Wilson amplitude'   | 'TA AR2'                | 'TA zero crossings'     | 'GL Sixth Order Moment' |
| 9       | 'GL mobility'           | 'GL LMAV'               | 'GL waveform length'    | 'GL AR1'                |
| 10      | 'TA skewness'           | 'TA slope sign change'  | 'GL mobility'           | 'TA skewness'           |
| 11      | 'TA AR1'                | 'GL waveform length'    | 'TA AR4'                | 'GL AR2'                |
| 12      | 'TA AR2'                | 'TA mobility'           | 'TA AR3'                | 'GL AR3'                |
| 13      | 'GL complexity'         | 'GL AR1'                | 'GL AR2'                | 'GL complexity'         |
| 14      | 'GL Wilson amplitude'   | 'TA zero crossings'     | 'GL AR4'                | 'TA complexity'         |
| 15      | 'TA AR4'                | 'GL zero crossings'     | 'GL complexity'         | 'GL LMAV'               |
| 16      | 'TA AR3'                | 'GL Wilson amplitude'   | 'TA skewness'           | 'TA AR2'                |
| 17      | 'GL AR3'                | 'GL complexity'         | 'GL zero crossings'     | 'TA AR3'                |
| 18      | 'GL skewness'           | 'GL AR3'                | 'GL Wilson amplitude'   | 'TA mobility'           |
| 19      | 'TA complexity'         | 'GL AR4'                | 'GL slope sign change'  | 'TA AR4'                |
| 20      | 'GL zero crossings'     | 'TA skewness'           | 'GL AR3'                | 'GL AR4'                |
| 21      | 'GL slope sign change'  | 'TA Wilson amplitude'   | 'GL skewness'           | 'GL zero crossings'     |
| 22      | 'GL AR4'                | 'TA AR3'                |                         | 'GL Wilson amplitude'   |

**Table S8.** Feature list from different Selection Techniques from TA-VL muscles EMG.

| Ranking | Chi Square              | mrmr                    | relieff                 | fscnca                  |
|---------|-------------------------|-------------------------|-------------------------|-------------------------|
| 1       | 'TA Zero Order Moment'  | 'TA LMAV'               | 'TA Wilson amplitude'   | 'VL waveform length'    |
| 2       | 'VL Sixth Order Moment' | 'VL Sixth Order Moment' | 'TA zero crossings'     | 'VL skewness'           |
| 3       | 'TA slope sign change'  | 'TA AR4'                | 'TA Sixth Order Moment' | 'TA waveform length'    |
| 4       | 'TA zero crossings'     | 'TA AR2'                | 'TA AR2'                | 'TA zero crossings'     |
| 5       | 'TA Wilson amplitude'   | 'VL Wilson amplitude'   | 'TA slope sign change'  | 'TA slope sign change'  |
| 6       | 'VL waveform length'    | 'VL AR4'                | 'TA AR4'                | 'TA Wilson amplitude'   |
| 7       | 'VL LMAV'               | 'TA slope sign change'  | 'TA AR1'                | 'VL slope sign change'  |
| 8       | 'VL Wilson amplitude'   | 'VL Zero Order Moment'  | 'VL complexity'         | 'VL Wilson amplitude'   |
| 9       | 'VL AR3'                | 'VL waveform length'    | 'TA complexity'         | 'VL Sixth Order Moment' |
| 10      | 'TA skewness'           | 'VL slope sign change'  | 'VL AR2'                | 'TA skewness'           |
| 11      | 'TA AR1'                | 'TA mobility'           | 'VL AR4'                | 'VL Zero Order Moment'  |
| 12      | 'TA AR2'                | 'TA zero crossings'     | 'VL AR1'                | 'VL AR4'                |
| 13      | 'VL AR4'                | 'VL zero crossings'     | 'VL AR3'                | 'TA NSV'                |
| 14      | 'TA AR4'                | 'TA complexity'         | 'VL Zero Order Moment'  | 'TA AR3'                |
| 15      | 'TA AR3'                | 'TA skewness'           | 'VL slope sign change'  | 'TA AR2'                |
| 16      | 'VL zero crossings'     | 'TA Wilson amplitude'   | 'VL waveform length'    | 'TA mobility'           |
| 17      | 'VL AR1'                | 'TA AR3'                | 'TA AR3'                | 'VL AR1'                |
| 18      | 'TA complexity'         | 'VL skewness'           | 'VL zero crossings'     | 'TA complexity'         |
| 19      | 'VL skewness'           | 'VL mobility'           | 'TA skewness'           | 'TA AR4'                |
| 20      | 'VL slope sign change'  | 'VL complexity'         | 'VL Wilson amplitude'   | 'VL AR3'                |
| 21      | 'VL complexity'         | 'VL AR2'                | 'VL skewness'           | 'VL complexity'         |
| 22      | 'VL AR2'                | 'VL AR3'                |                         | 'VL AR2'                |
| 23      |                         |                         |                         | 'VL zero crossings'     |

**Table S9.** Feature list from different Selection Techniques from GL-VL-TA muscles EMG.

| Ranking | Chi Square              | mrmr                    | relieff                 | fscnca                   |
|---------|-------------------------|-------------------------|-------------------------|--------------------------|
| 1       | 'TA Zero Order Moment'  | 'TA LMAV'               | 'TA mobility'           | 'VL waveform length'     |
| 2       | 'GL Zero Order Moment'  | 'VL Sixth Order Moment' | 'TA Sixth Order Moment' | 'GL waveform length'     |
| 3       | 'VL Sixth Order Moment' | 'GL Amplitude change 2' | 'TA Wilson amplitude'   | 'VL skewness'            |
| 4       | 'GL Amplitude change 2' | 'GL AR2'                | 'TA zero crossings'     | 'TA waveform length'     |
| 5       | 'GL AR2'                | 'TA AR4'                | 'TA AR2'                | 'VL zero crossings'      |
| 6       | 'TA slope sign change'  | 'GL skewness'           | 'TA complexity'         | 'TA Wilson amplitude'    |
| 7       | 'GL waveform length'    | 'TA AR2'                | 'GL Amplitude change 2' | 'VL Wilson amplitude'    |
| 8       | 'TA zero crossings'     | 'VL Wilson amplitude'   | 'GL NSV'                | 'GL Wilson amplitude'    |
| 9       | 'TA Wilson amplitude'   | 'GL LMAV'               | 'GL waveform length'    | 'VL slope sign change'   |
| 10      | 'VL waveform length'    | 'GL slope sign change'  | 'TA slope sign change'  | 'GL zero crossings'      |
| 11      | 'GL mobility'           | 'VL Zero Order Moment'  | 'TA AR4'                | 'TA zero crossings'      |
| 12      | 'VL LMAV'               | 'TA slope sign change'  | 'GL AR1'                | 'TA slope sign change'   |
| 13      | 'VL Wilson amplitude'   | 'VL AR4'                | 'VL complexity'         | 'VL Zero Order Moment'   |
| 14      | 'VL AR3'                | 'GL waveform length'    | 'VL AR1'                | 'VL Fourth Order Moment' |
| 15      | 'TA skewness'           | 'VL waveform length'    | 'TA AR3'                | 'GL Fourth Order Moment' |
| 16      | 'TA AR1'                | 'VL slope sign change'  | 'VL AR4'                | 'TA Second Order Moment' |
| 17      | 'TA AR2'                | 'TA mobility'           | 'VL Zero Order Moment'  | 'VL mobility'            |
| 18      | 'VL AR4'                | 'GL AR1'                | 'VL AR3'                | 'GL mobility'            |
| 19      | 'GL complexity'         | 'TA zero crossings'     | 'GL AR2'                | 'GL AR2'                 |
| 20      | 'GL Wilson amplitude'   | 'VL zero crossings'     | 'GL AR4'                | 'TA skewness'            |
| 21      | 'TA AR4'                | 'TA complexity'         | 'GL complexity'         | 'TA AR1'                 |



|    |                        |                       |                        |                        |
|----|------------------------|-----------------------|------------------------|------------------------|
| 22 | 'TA AR3'               | 'GL zero crossings'   | 'TA skewness'          | 'TA AR2'               |
| 23 | 'GL AR3'               | 'GL Wilson amplitude' | 'VL Wilson amplitude'  | 'VL AR2'               |
| 24 | 'VL zero crossings'    | 'GL complexity'       | 'VL slope sign change' | 'TA AR3'               |
| 25 | 'VL AR1'               | 'GL AR3'              | 'GL zero crossings'    | 'VL AR4'               |
| 26 | 'GL skewness'          | 'GL AR4'              | 'VL zero crossings'    | 'GL AR4'               |
| 27 | 'TA complexity'        | 'TA skewness'         | 'VL AR2'               | 'TA complexity'        |
| 28 | 'GL zero crossings'    | 'TA Wilson amplitude' | 'VL skewness'          | 'GL AR3'               |
| 29 | 'GL slope sign change' | 'TA AR3'              | 'GL AR3'               | 'TA AR4'               |
| 30 | 'VL skewness'          | 'VL skewness'         | 'GL Wilson amplitude'  | 'GL slope sign change' |
| 31 | 'VL slope sign change' | 'VL mobility'         | 'GL slope sign change' | 'VL complexity'        |
| 32 | 'VL complexity'        | 'VL complexity'       | 'GL skewness'          | 'GL skewness'          |
| 33 | 'GL AR4'               | 'VL AR2'              |                        | 'VL AR3'               |
| 34 | 'VL AR2'               | 'VL AR3'              |                        | 'GL complexity'        |

**Table S10.** Performance evaluation matrix using features from GL muscle EMG for different feature selection techniques.

| A Chi Square feature Ranking Technique     |              |               |                 |              |      |
|--------------------------------------------|--------------|---------------|-----------------|--------------|------|
| Incremental combination of Ranked features | Accuracy (%) | Precision (%) | Sensitivity (%) | F1-Score (%) | AUC  |
| Top 1                                      | 48.47        | 50.27         | 48.47           | 48.81        | 0.58 |
| Top 2                                      | 66.79        | 67.22         | 66.79           | 66.65        | 0.66 |
| Top 3                                      | 77.10        | 77.99         | 77.10           | 77.25        | 0.81 |
| Top 4                                      | 80.53        | 81.52         | 80.53           | 80.69        | 0.81 |
| Top 5                                      | 78.63        | 79.34         | 78.63           | 78.79        | 0.81 |
| Top 6                                      | 80.92        | 81.77         | 80.92           | 81.03        | 0.81 |
| Top 7                                      | 80.53        | 81.35         | 80.53           | 80.68        | 0.84 |
| Top 8                                      | 81.30        | 82.22         | 81.30           | 81.54        | 0.83 |
| Top 9                                      | 80.15        | 80.58         | 80.15           | 80.22        | 0.81 |
| Top 10                                     | 80.53        | 81.42         | 80.53           | 80.76        | 0.82 |
| Top 11                                     | 79.39        | 79.67         | 79.39           | 79.41        | 0.81 |
| B mrmr feature Ranking Technique           |              |               |                 |              |      |
| Incremental combination of Ranked features | Accuracy (%) | Precision (%) | Sensitivity (%) | F1-Score (%) | AUC  |
| Top 1                                      | 50.00        | 54.03         | 50.00           | 51.20        | 0.54 |
| Top 2                                      | 64.50        | 65.60         | 64.50           | 64.69        | 0.66 |
| Top 3                                      | 65.65        | 66.66         | 65.65           | 65.99        | 0.66 |
| Top 4                                      | 68.32        | 69.65         | 68.32           | 68.65        | 0.70 |
| Top 5                                      | 68.70        | 68.99         | 68.70           | 68.73        | 0.69 |
| Top 6                                      | 69.08        | 69.61         | 69.08           | 69.28        | 0.70 |
| Top 7                                      | 73.28        | 74.27         | 73.28           | 73.52        | 0.75 |
| Top 8                                      | 75.95        | 76.05         | 75.95           | 75.90        | 0.77 |
| Top 9                                      | 79.01        | 79.33         | 79.01           | 79.11        | 0.81 |
| Top 10                                     | 78.24        | 78.36         | 78.24           | 78.29        | 0.80 |
| Top 11                                     | 80.92        | 81.59         | 80.92           | 81.11        | 0.82 |
| C relieff feature Ranking Technique        |              |               |                 |              |      |

| <b>D</b>                                          |                     |                      |                        |                     |            |
|---------------------------------------------------|---------------------|----------------------|------------------------|---------------------|------------|
| <b>fscnc feature Ranking Technique</b>            |                     |                      |                        |                     |            |
| <b>Incremental combination of Ranked features</b> | <b>Accuracy (%)</b> | <b>Precision (%)</b> | <b>Sensitivity (%)</b> | <b>F1-Score (%)</b> | <b>AUC</b> |
| Top 1                                             | 45.42               | 51.10                | 45.42                  | 47.32               | 0.62       |
| Top 2                                             | 54.58               | 56.92                | 54.58                  | 55.19               | 0.62       |
| Top 3                                             | 73.66               | 74.82                | 73.66                  | 74.03               | 0.77       |
| Top 4                                             | 80.53               | 81.75                | 80.53                  | 80.73               | 0.82       |
| Top 5                                             | 80.15               | 80.58                | 80.15                  | 80.20               | 0.80       |
| Top 6                                             | 80.53               | 80.96                | 80.53                  | 80.53               | 0.82       |
| Top 7                                             | 84.73               | 84.89                | 84.73                  | 84.76               | 0.85       |
| Top 8                                             | 80.92               | 81.70                | 80.92                  | 81.09               | 0.82       |
| Top 9                                             | 81.68               | 82.09                | 81.68                  | 81.74               | 0.83       |
| Top 10                                            | 80.53               | 81.06                | 80.53                  | 80.65               | 0.82       |
| Top 11                                            | 80.92               | 81.26                | 80.92                  | 81.04               | 0.82       |
| <b>A</b>                                          |                     |                      |                        |                     |            |
| <b>Chi Square feature Ranking Technique</b>       |                     |                      |                        |                     |            |
| <b>Incremental combination of Ranked features</b> | <b>Accuracy (%)</b> | <b>Precision (%)</b> | <b>Sensitivity (%)</b> | <b>F1-Score (%)</b> | <b>AUC</b> |
| Top 1                                             | 39.31               | 44.00                | 39.31                  | 40.68               | 0.57       |
| Top 2                                             | 51.15               | 54.52                | 51.15                  | 52.25               | 0.59       |
| Top 3                                             | 56.11               | 56.79                | 56.11                  | 56.36               | 0.64       |
| Top 4                                             | 54.96               | 57.67                | 54.96                  | 55.89               | 0.61       |
| Top 5                                             | 65.27               | 67.52                | 65.27                  | 65.91               | 0.71       |
| Top 6                                             | 65.65               | 67.70                | 65.65                  | 66.30               | 0.70       |
| Top 7                                             | 75.57               | 76.33                | 75.57                  | 75.81               | 0.79       |
| Top 8                                             | 75.57               | 76.35                | 75.57                  | 75.80               | 0.78       |
| Top 9                                             | 75.57               | 77.36                | 75.57                  | 76.02               | 0.78       |
| Top 10                                            | 81.30               | 82.27                | 81.30                  | 81.54               | 0.83       |
| Top 11                                            | 77.48               | 78.50                | 77.48                  | 77.75               | 0.79       |

**Table S11.** Performance evaluation matrix using features from VL muscle EMG for different feature selection techniques.

| <b>B</b>                                          |                     |                      |                        |                     |            |
|---------------------------------------------------|---------------------|----------------------|------------------------|---------------------|------------|
| <b>mrmr feature Ranking Technique</b>             |                     |                      |                        |                     |            |
| <b>Incremental combination of Ranked features</b> | <b>Accuracy (%)</b> | <b>Precision (%)</b> | <b>Sensitivity (%)</b> | <b>F1-Score (%)</b> | <b>AUC</b> |
| Top 1                                             | 48.85               | 53.54                | 48.85                  | 50.38               | 0.61       |
| Top 2                                             | 64.89               | 67.56                | 64.89                  | 65.54               | 0.78       |
| Top 3                                             | 59.92               | 63.38                | 59.92                  | 60.61               | 0.73       |
| Top 4                                             | 61.45               | 62.33                | 61.45                  | 61.71               | 0.70       |
| Top 5                                             | 68.32               | 69.99                | 68.32                  | 68.81               | 0.73       |
| Top 6                                             | 69.85               | 70.43                | 69.85                  | 70.01               | 0.74       |
| Top 7                                             | 72.90               | 74.46                | 72.90                  | 73.48               | 0.82       |
| Top 8                                             | 73.66               | 74.09                | 73.66                  | 73.82               | 0.80       |
| Top 9                                             | 67.56               | 69.85                | 67.56                  | 68.32               | 0.75       |
| Top 10                                            | 74.81               | 75.55                | 74.81                  | 75.09               | 0.80       |
| Top 11                                            | 72.90               | 73.93                | 72.90                  | 73.25               | 0.80       |

| <b>Incremental combination of Ranked features</b> | <b>Accuracy (%)</b> | <b>Precision (%)</b> | <b>Sensitivity (%)</b> | <b>F1-Score (%)</b> | <b>AUC</b> |
|---------------------------------------------------|---------------------|----------------------|------------------------|---------------------|------------|
| Top 1                                             | 49.62               | 54.16                | 49.62                  | 51.13               | 0.59       |
| Top 2                                             | 61.83               | 64.56                | 61.83                  | 62.72               | 0.73       |
| Top 3                                             | 61.45               | 63.29                | 61.45                  | 62.05               | 0.71       |
| Top 4                                             | 56.11               | 58.28                | 56.11                  | 56.85               | 0.64       |
| Top 5                                             | 61.45               | 63.94                | 61.45                  | 62.41               | 0.72       |
| Top 6                                             | 67.56               | 69.48                | 67.56                  | 68.17               | 0.76       |
| Top 7                                             | 65.65               | 66.65                | 65.65                  | 66.06               | 0.72       |
| Top 8                                             | 68.70               | 69.58                | 68.70                  | 69.04               | 0.77       |
| Top 9                                             | 70.23               | 71.64                | 70.23                  | 70.78               | 0.78       |
| Top 10                                            | 74.81               | 75.65                | 74.81                  | 75.15               | 0.81       |
| Top 11                                            | 75.95               | 76.77                | 75.95                  | 76.24               | 0.82       |
| <b>C relief feature Ranking Technique</b>         |                     |                      |                        |                     |            |
| <b>Incremental combination of Ranked features</b> | <b>Accuracy (%)</b> | <b>Precision (%)</b> | <b>Sensitivity (%)</b> | <b>F1-Score (%)</b> | <b>AUC</b> |
| Top 1                                             | 43.13               | 48.68                | 43.13                  | 44.90               | 0.57       |
| Top 2                                             | 58.78               | 63.06                | 58.78                  | 60.36               | 0.71       |
| Top 3                                             | 64.50               | 67.44                | 64.50                  | 65.55               | 0.78       |
| Top 4                                             | 69.08               | 70.33                | 69.08                  | 69.61               | 0.76       |
| Top 5                                             | 75.19               | 76.13                | 75.19                  | 75.56               | 0.79       |
| Top 6                                             | 74.81               | 75.74                | 74.81                  | 75.15               | 0.83       |
| Top 7                                             | 74.81               | 76.01                | 74.81                  | 75.24               | 0.81       |
| Top 8                                             | 77.10               | 77.96                | 77.10                  | 77.39               | 0.83       |
| Top 9                                             | 75.57               | 77.20                | 75.57                  | 76.18               | 0.83       |
| Top 10                                            | 77.10               | 78.74                | 77.10                  | 77.65               | 0.81       |
| Top 11                                            | 74.81               | 75.20                | 74.81                  | 74.96               | 0.82       |
| <b>D fscnca feature Ranking Technique</b>         |                     |                      |                        |                     |            |
| <b>Incremental combination of Ranked features</b> | <b>Accuracy (%)</b> | <b>Precision (%)</b> | <b>Sensitivity (%)</b> | <b>F1-Score (%)</b> | <b>AUC</b> |
| Top 1                                             | 37.79               | 43.55                | 37.79                  | 38.71               | 0.55       |
| Top 2                                             | 50.38               | 53.77                | 50.38                  | 51.60               | 0.62       |
| Top 3                                             | 62.60               | 64.50                | 62.60                  | 63.16               | 0.69       |
| Top 4                                             | 62.60               | 63.49                | 62.60                  | 62.84               | 0.66       |
| Top 5                                             | 70.99               | 73.03                | 70.99                  | 71.65               | 0.77       |
| Top 6                                             | 67.56               | 67.61                | 67.56                  | 67.58               | 0.74       |
| Top 7                                             | 68.70               | 69.07                | 68.70                  | 68.84               | 0.75       |
| Top 8                                             | 69.47               | 70.17                | 69.47                  | 69.64               | 0.78       |
| Top 9                                             | 71.37               | 72.19                | 71.37                  | 71.63               | 0.80       |
| Top 10                                            | 72.90               | 73.96                | 72.90                  | 73.27               | 0.81       |
| Top 11                                            | 76.72               | 77.25                | 76.72                  | 76.84               | 0.83       |

**Table S12.** Performance evaluation matrix using features from TA muscle EMG for different feature selection techniques.

| <b>A Chi Square feature Ranking Technique</b>     |                     |                      |                        |                     |            |
|---------------------------------------------------|---------------------|----------------------|------------------------|---------------------|------------|
| <b>Incremental combination of Ranked features</b> | <b>Accuracy (%)</b> | <b>Precision (%)</b> | <b>Sensitivity (%)</b> | <b>F1-Score (%)</b> | <b>AUC</b> |
| Top 1                                             | 52.67               | 52.54                | 52.67                  | 52.33               | 0.57       |
| Top 2                                             | 59.92               | 60.22                | 59.92                  | 60.05               | 0.61       |
| Top 3                                             | 64.12               | 63.74                | 64.12                  | 63.87               | 0.64       |
| Top 4                                             | 69.47               | 69.70                | 69.47                  | 69.57               | 0.71       |
| Top 5                                             | 78.63               | 78.99                | 78.63                  | 78.71               | 0.78       |
| Top 6                                             | 75.19               | 75.77                | 75.19                  | 75.41               | 0.74       |
| Top 7                                             | 77.86               | 78.46                | 77.86                  | 78.04               | 0.79       |
| Top 8                                             | 80.53               | 80.91                | 80.53                  | 80.59               | 0.82       |
| Top 9                                             | 79.39               | 79.36                | 79.39                  | 79.35               | 0.80       |
| Top 10                                            | 77.48               | 78.45                | 77.48                  | 77.75               | 0.79       |
| Top 11                                            | 80.15               | 80.93                | 80.15                  | 80.36               | 0.82       |
| <b>B mrmr feature Ranking Technique</b>           |                     |                      |                        |                     |            |
| <b>Incremental combination of Ranked features</b> | <b>Accuracy (%)</b> | <b>Precision (%)</b> | <b>Sensitivity (%)</b> | <b>F1-Score (%)</b> | <b>AUC</b> |
| Top 1                                             | 50.38               | 51.43                | 50.38                  | 50.64               | 0.55       |
| Top 2                                             | 55.73               | 55.72                | 55.73                  | 55.72               | 0.60       |
| Top 3                                             | 68.32               | 68.37                | 68.32                  | 68.34               | 0.70       |
| Top 4                                             | 79.01               | 79.12                | 79.01                  | 79.03               | 0.79       |
| Top 5                                             | 75.57               | 75.80                | 75.57                  | 75.65               | 0.77       |
| Top 6                                             | 77.48               | 77.93                | 77.48                  | 77.59               | 0.79       |
| Top 7                                             | 76.34               | 76.65                | 76.34                  | 76.47               | 0.78       |
| Top 8                                             | 78.63               | 79.13                | 78.63                  | 78.82               | 0.79       |
| Top 9                                             | 84.35               | 85.06                | 84.35                  | 84.48               | 0.87       |
| Top 10                                            | 79.77               | 80.16                | 79.77                  | 79.86               | 0.82       |
| Top 11                                            | 80.15               | 80.35                | 80.15                  | 80.23               | 0.80       |
| <b>C relieff feature Ranking Technique</b>        |                     |                      |                        |                     |            |
| <b>Incremental combination of Ranked features</b> | <b>Accuracy (%)</b> | <b>Precision (%)</b> | <b>Sensitivity (%)</b> | <b>F1-Score (%)</b> | <b>AUC</b> |
| Top 1                                             | 53.44               | 54.69                | 53.44                  | 53.63               | 0.61       |
| Top 2                                             | 58.40               | 59.24                | 58.40                  | 58.52               | 0.59       |
| Top 3                                             | 67.18               | 67.37                | 67.18                  | 67.21               | 0.73       |
| Top 4                                             | 69.85               | 71.13                | 69.85                  | 70.22               | 0.72       |
| Top 5                                             | 76.72               | 76.90                | 76.72                  | 76.79               | 0.79       |
| Top 6                                             | 79.39               | 79.75                | 79.39                  | 79.52               | 0.80       |
| Top 7                                             | 80.92               | 81.38                | 80.92                  | 81.07               | 0.82       |
| Top 8                                             | 79.77               | 80.62                | 79.77                  | 79.99               | 0.82       |
| Top 9                                             | 81.30               | 81.58                | 81.30                  | 81.40               | 0.82       |
| Top 10                                            | 79.77               | 81.17                | 79.77                  | 80.11               | 0.82       |
| Top 11                                            | 79.39               | 79.70                | 79.39                  | 79.46               | 0.83       |
| <b>D fscnca feature Ranking Technique</b>         |                     |                      |                        |                     |            |

| Incremental combination of Ranked features | Accuracy (%) | Precision (%) | Sensitivity (%) | F1-Score (%) | AUC  |
|--------------------------------------------|--------------|---------------|-----------------|--------------|------|
| Top 1                                      | 48.85        | 51.41         | 48.85           | 49.38        | 0.59 |
| Top 2                                      | 62.98        | 63.18         | 62.98           | 63.02        | 0.65 |
| Top 3                                      | 62.60        | 63.57         | 62.60           | 62.83        | 0.68 |
| Top 4                                      | 70.23        | 70.45         | 70.23           | 70.33        | 0.74 |
| Top 5                                      | 70.99        | 71.39         | 70.99           | 71.15        | 0.72 |
| Top 6                                      | 70.23        | 70.78         | 70.23           | 70.44        | 0.72 |
| Top 7                                      | 71.37        | 72.03         | 71.37           | 71.57        | 0.74 |
| Top 8                                      | 72.90        | 73.65         | 72.90           | 73.12        | 0.75 |
| Top 9                                      | 79.01        | 79.05         | 79.01           | 79.01        | 0.78 |
| Top 10                                     | 80.15        | 80.27         | 80.15           | 80.19        | 0.81 |
| Top 11                                     | 83.59        | 83.93         | 83.59           | 83.67        | 0.86 |

**Table S13.** Performance evaluation matrix using features from GL and TA muscles EMG for different feature selection techniques.

| A Chi Square feature Ranking Technique     |              |               |                 |              |      |
|--------------------------------------------|--------------|---------------|-----------------|--------------|------|
| Incremental combination of Ranked features | Accuracy (%) | Precision (%) | Sensitivity (%) | F1-Score (%) | AUC  |
| Top 10                                     | 89.69        | 89.81         | 89.69           | 89.70        | 0.92 |
| Top 11                                     | 90.84        | 90.91         | 90.84           | 90.84        | 0.91 |
| Top 12                                     | 91.98        | 92.02         | 91.98           | 91.99        | 0.93 |
| Top 13                                     | 93.51        | 93.70         | 93.51           | 93.52        | 0.95 |
| Top 14                                     | 89.31        | 89.79         | 89.31           | 89.39        | 0.91 |
| Top 15                                     | 95.80        | 96.04         | 95.80           | 95.84        | 0.96 |
| Top 16                                     | 92.75        | 92.90         | 92.75           | 92.78        | 0.93 |
| Top 17                                     | 91.98        | 92.04         | 91.98           | 92.00        | 0.92 |
| Top 18                                     | 93.89        | 94.23         | 93.89           | 93.94        | 0.95 |
| Top 19                                     | 91.98        | 92.04         | 91.98           | 92.00        | 0.93 |
| Top 20                                     | 92.37        | 92.77         | 92.37           | 92.45        | 0.93 |
| B mrmr feature Ranking Technique           |              |               |                 |              |      |
| Incremental combination of Ranked features | Accuracy (%) | Precision (%) | Sensitivity (%) | F1-Score (%) | AUC  |
| Top 10                                     | 88.55        | 89.15         | 88.55           | 88.65        | 0.91 |
| Top 11                                     | 91.22        | 91.72         | 91.22           | 91.29        | 0.92 |
| Top 12                                     | 88.93        | 89.24         | 88.93           | 89.00        | 0.89 |
| Top 13                                     | 90.84        | 91.56         | 90.84           | 90.95        | 0.92 |
| Top 14                                     | 90.84        | 91.21         | 90.84           | 90.90        | 0.92 |
| Top 15                                     | 89.69        | 90.06         | 89.69           | 89.74        | 0.91 |
| Top 16                                     | 92.37        | 92.87         | 92.37           | 92.47        | 0.93 |
| Top 17                                     | 94.27        | 94.38         | 94.27           | 94.30        | 0.95 |
| Top 18                                     | 91.98        | 92.21         | 91.98           | 92.04        | 0.92 |
| Top 19                                     | 91.60        | 91.68         | 91.60           | 91.63        | 0.92 |
| Top 20                                     | 90.84        | 91.18         | 90.84           | 90.91        | 0.92 |
| C relieff feature Ranking Technique        |              |               |                 |              |      |

| <b>Incremental combination of Ranked features</b> | <b>Accuracy (%)</b>                     | <b>Precision (%)</b> | <b>Sensitivity (%)</b> | <b>F1-Score (%)</b> | <b>AUC</b> |
|---------------------------------------------------|-----------------------------------------|----------------------|------------------------|---------------------|------------|
| Top 10                                            | 89.69                                   | 90.12                | 89.69                  | 89.79               | 0.90       |
| Top 11                                            | 90.46                                   | 90.54                | 90.46                  | 90.48               | 0.91       |
| Top 12                                            | 90.08                                   | 90.37                | 90.08                  | 90.13               | 0.92       |
| Top 13                                            | 92.37                                   | 92.59                | 92.37                  | 92.40               | 0.94       |
| Top 14                                            | 92.37                                   | 92.91                | 92.37                  | 92.46               | 0.95       |
| Top 15                                            | 94.27                                   | 94.40                | 94.27                  | 94.30               | 0.95       |
| Top 16                                            | 91.98                                   | 92.13                | 91.98                  | 92.03               | 0.92       |
| Top 17                                            | 95.04                                   | 95.16                | 95.04                  | 95.05               | 0.96       |
| Top 18                                            | 91.60                                   | 91.94                | 91.60                  | 91.67               | 0.92       |
| Top 19                                            | 90.84                                   | 91.01                | 90.84                  | 90.89               | 0.92       |
| Top 20                                            | 93.51                                   | 93.56                | 93.51                  | 93.53               | 0.93       |
| <b>D</b>                                          | <b>fscnca feature Ranking Technique</b> |                      |                        |                     |            |
| <b>Incremental combination of Ranked features</b> | <b>Accuracy (%)</b>                     | <b>Precision (%)</b> | <b>Sensitivity (%)</b> | <b>F1-Score (%)</b> | <b>AUC</b> |
| Top 12                                            | 84.73                                   | 85.30                | 84.73                  | 84.87               | 0.86       |
| Top 13                                            | 88.93                                   | 89.82                | 88.93                  | 89.11               | 0.90       |
| Top 14                                            | 90.84                                   | 91.67                | 90.84                  | 90.96               | 0.93       |
| Top 15                                            | 90.46                                   | 90.74                | 90.46                  | 90.48               | 0.93       |
| Top 16                                            | 92.37                                   | 92.73                | 92.37                  | 92.45               | 0.93       |
| Top 17                                            | 91.22                                   | 91.68                | 91.22                  | 91.33               | 0.91       |
| Top 18                                            | 88.93                                   | 89.35                | 88.93                  | 89.04               | 0.89       |
| Top 19                                            | 89.31                                   | 89.77                | 89.31                  | 89.42               | 0.90       |
| Top 20                                            | 91.22                                   | 91.51                | 91.22                  | 91.29               | 0.92       |
| Top 21                                            | 90.84                                   | 91.09                | 90.84                  | 90.90               | 0.92       |
| Top 22                                            | 93.51                                   | 93.67                | 93.51                  | 93.55               | 0.94       |

**Table S14.** Performance evaluation matrix using features from GL and VL muscles EMG for different feature selection techniques.

| <b>A</b>                                          | <b>Chi Square feature Ranking Technique</b> |                      |                        |                     |            |
|---------------------------------------------------|---------------------------------------------|----------------------|------------------------|---------------------|------------|
| <b>Incremental combination of Ranked features</b> | <b>Accuracy (%)</b>                         | <b>Precision (%)</b> | <b>Sensitivity (%)</b> | <b>F1-Score (%)</b> | <b>AUC</b> |
| Top 10                                            | 92.37                                       | 92.58                | 92.37                  | 92.42               | 0.95       |
| Top 11                                            | 95.04                                       | 95.31                | 95.04                  | 95.08               | 0.97       |
| Top 12                                            | 96.18                                       | 96.25                | 96.18                  | 96.20               | 0.97       |
| Top 13                                            | 94.66                                       | 95.00                | 94.66                  | 94.73               | 0.97       |
| Top 14                                            | 94.66                                       | 94.86                | 94.66                  | 94.69               | 0.96       |
| Top 15                                            | 95.42                                       | 95.52                | 95.42                  | 95.44               | 0.97       |
| Top 16                                            | 94.66                                       | 94.73                | 94.66                  | 94.68               | 0.96       |
| Top 17                                            | 93.51                                       | 93.80                | 93.51                  | 93.54               | 0.97       |
| Top 18                                            | 93.13                                       | 93.28                | 93.13                  | 93.15               | 0.96       |
| Top 19                                            | 91.98                                       | 92.17                | 91.98                  | 92.00               | 0.96       |
| Top 20                                            | 93.13                                       | 93.23                | 93.13                  | 93.16               | 0.97       |
| <b>B</b>                                          | <b>mrmr feature Ranking Technique</b>       |                      |                        |                     |            |

| <b>Incremental combination of Ranked features</b> |                     |                      |                        |                     |            |
|---------------------------------------------------|---------------------|----------------------|------------------------|---------------------|------------|
|                                                   | <b>Accuracy (%)</b> | <b>Precision (%)</b> | <b>Sensitivity (%)</b> | <b>F1-Score (%)</b> | <b>AUC</b> |
| Top 10                                            | 90.08               | 90.28                | 90.08                  | 90.10               | 0.93       |
| Top 11                                            | 91.22               | 91.45                | 91.22                  | 91.25               | 0.95       |
| Top 12                                            | 92.75               | 92.93                | 92.75                  | 92.77               | 0.95       |
| Top 13                                            | 93.51               | 93.51                | 93.51                  | 93.51               | 0.95       |
| Top 14                                            | 93.51               | 93.59                | 93.51                  | 93.52               | 0.95       |
| Top 15                                            | 93.51               | 93.54                | 93.51                  | 93.52               | 0.94       |
| Top 16                                            | 91.60               | 91.67                | 91.60                  | 91.63               | 0.95       |
| Top 17                                            | 91.98               | 92.15                | 91.98                  | 92.00               | 0.95       |
| Top 18                                            | 91.22               | 91.35                | 91.22                  | 91.23               | 0.95       |
| Top 19                                            | 90.84               | 91.14                | 90.84                  | 90.90               | 0.95       |
| Top 20                                            | 90.84               | 91.19                | 90.84                  | 90.96               | 0.93       |
| <b>C relief feature Ranking Technique</b>         |                     |                      |                        |                     |            |
| <b>Incremental combination of Ranked features</b> |                     |                      |                        |                     |            |
|                                                   | <b>Accuracy (%)</b> | <b>Precision (%)</b> | <b>Sensitivity (%)</b> | <b>F1-Score (%)</b> | <b>AUC</b> |
| Top 10                                            | 92.75               | 92.99                | 92.75                  | 92.79               | 0.94       |
| Top 11                                            | 91.60               | 92.04                | 91.60                  | 91.68               | 0.93       |
| Top 12                                            | 92.37               | 92.60                | 92.37                  | 92.42               | 0.94       |
| Top 13                                            | 93.89               | 94.08                | 93.89                  | 93.94               | 0.96       |
| Top 14                                            | 95.04               | 95.31                | 95.04                  | 95.08               | 0.97       |
| Top 15                                            | 95.04               | 95.09                | 95.04                  | 95.04               | 0.96       |
| Top 16                                            | 95.80               | 95.84                | 95.80                  | 95.81               | 0.97       |
| Top 17                                            | 93.89               | 94.16                | 93.89                  | 93.94               | 0.96       |
| Top 18                                            | 95.80               | 95.84                | 95.80                  | 95.81               | 0.99       |
| Top 19                                            | 93.89               | 93.97                | 93.89                  | 93.92               | 0.96       |
| Top 20                                            | 93.51               | 93.74                | 93.51                  | 93.56               | 0.96       |
| <b>D fscna feature Ranking Technique</b>          |                     |                      |                        |                     |            |
| <b>Incremental combination of Ranked features</b> |                     |                      |                        |                     |            |
|                                                   | <b>Accuracy (%)</b> | <b>Precision (%)</b> | <b>Sensitivity (%)</b> | <b>F1-Score (%)</b> | <b>AUC</b> |
| Top 14                                            | 88.93               | 89.03                | 88.93                  | 88.96               | 0.92       |
| Top 15                                            | 87.02               | 87.15                | 87.02                  | 87.06               | 0.90       |
| Top 16                                            | 89.69               | 89.79                | 89.69                  | 89.73               | 0.92       |
| Top 17                                            | 87.02               | 87.40                | 87.02                  | 87.13               | 0.90       |
| Top 18                                            | 90.08               | 90.18                | 90.08                  | 90.12               | 0.91       |
| Top 19                                            | 90.08               | 90.30                | 90.08                  | 90.14               | 0.93       |
| Top 20                                            | 92.37               | 92.57                | 92.37                  | 92.40               | 0.96       |
| Top 21                                            | 92.75               | 93.12                | 92.75                  | 92.82               | 0.96       |
| Top 22                                            | 90.84               | 90.99                | 90.84                  | 90.84               | 0.94       |
| Top 23                                            | 91.98               | 92.39                | 91.98                  | 92.04               | 0.95       |
| Top 24                                            | 91.60               | 92.11                | 91.60                  | 91.66               | 0.95       |

**Table S15.** Performance evaluation matrix using features from TA and VL muscles EMG for different feature selection techniques.

| <b>A Chi Square feature Ranking Technique</b>     |                     |                      |                        |                     |            |
|---------------------------------------------------|---------------------|----------------------|------------------------|---------------------|------------|
| <b>Incremental combination of Ranked features</b> | <b>Accuracy (%)</b> | <b>Precision (%)</b> | <b>Sensitivity (%)</b> | <b>F1-Score (%)</b> | <b>AUC</b> |
| Top 10                                            | 86.26               | 86.89                | 86.26                  | 86.41               | 0.87       |
| Top 11                                            | 85.88               | 86.35                | 85.88                  | 86.00               | 0.86       |
| Top 12                                            | 87.79               | 88.14                | 87.79                  | 87.90               | 0.88       |
| Top 13                                            | 86.26               | 86.65                | 86.26                  | 86.39               | 0.86       |
| Top 14                                            | 89.69               | 89.95                | 89.69                  | 89.76               | 0.89       |
| Top 15                                            | 91.22               | 91.67                | 91.22                  | 91.34               | 0.92       |
| Top 16                                            | 90.08               | 90.52                | 90.08                  | 90.18               | 0.90       |
| Top 17                                            | 88.93               | 89.20                | 88.93                  | 89.01               | 0.89       |
| Top 18                                            | 92.37               | 92.71                | 92.37                  | 92.44               | 0.94       |
| Top 19                                            | 89.69               | 90.41                | 89.69                  | 89.85               | 0.91       |
| Top 20                                            | 90.84               | 91.24                | 90.84                  | 90.95               | 0.91       |
| <b>B mrmr feature Ranking Technique</b>           |                     |                      |                        |                     |            |
| <b>Incremental combination of Ranked features</b> | <b>Accuracy (%)</b> | <b>Precision (%)</b> | <b>Sensitivity (%)</b> | <b>F1-Score (%)</b> | <b>AUC</b> |
| Top 10                                            | 85.88               | 86.44                | 85.88                  | 86.02               | 0.87       |
| Top 11                                            | 87.79               | 88.23                | 87.79                  | 87.89               | 0.89       |
| Top 12                                            | 91.60               | 91.87                | 91.60                  | 91.66               | 0.92       |
| Top 13                                            | 91.98               | 92.07                | 91.98                  | 92.01               | 0.91       |
| Top 14                                            | 90.08               | 90.39                | 90.08                  | 90.16               | 0.91       |
| Top 15                                            | 90.46               | 90.73                | 90.46                  | 90.52               | 0.91       |
| Top 16                                            | 89.31               | 89.56                | 89.31                  | 89.36               | 0.89       |
| Top 17                                            | 90.08               | 90.52                | 90.08                  | 90.18               | 0.90       |
| Top 18                                            | 88.93               | 89.09                | 88.93                  | 88.99               | 0.88       |
| Top 19                                            | 90.46               | 90.95                | 90.46                  | 90.59               | 0.91       |
| Top 20                                            | 91.22               | 91.65                | 91.22                  | 91.33               | 0.92       |
| <b>C relieff feature Ranking Technique</b>        |                     |                      |                        |                     |            |
| <b>Incremental combination of Ranked features</b> | <b>Accuracy (%)</b> | <b>Precision (%)</b> | <b>Sensitivity (%)</b> | <b>F1-Score (%)</b> | <b>AUC</b> |
| Top 10                                            | 85.88               | 86.59                | 85.88                  | 86.10               | 0.87       |
| Top 11                                            | 85.50               | 86.12                | 85.50                  | 85.68               | 0.86       |
| Top 12                                            | 90.08               | 90.76                | 90.08                  | 90.22               | 0.91       |
| Top 13                                            | 89.69               | 90.08                | 89.69                  | 89.81               | 0.90       |
| Top 14                                            | 91.98               | 92.08                | 91.98                  | 92.01               | 0.92       |
| Top 15                                            | 90.08               | 90.61                | 90.08                  | 90.20               | 0.90       |
| Top 16                                            | 90.08               | 90.32                | 90.08                  | 90.16               | 0.90       |
| Top 17                                            | 92.75               | 93.03                | 92.75                  | 92.82               | 0.93       |
| Top 18                                            | 91.22               | 91.73                | 91.22                  | 91.35               | 0.91       |
| Top 19                                            | 91.22               | 91.60                | 91.22                  | 91.33               | 0.91       |
| Top 20                                            | 90.84               | 91.36                | 90.84                  | 90.96               | 0.91       |
| <b>D fscnca feature Ranking Technique</b>         |                     |                      |                        |                     |            |



| Incremental combination of Ranked features | Accuracy (%) | Precision (%) | Sensitivity (%) | F1-Score (%) | AUC  |
|--------------------------------------------|--------------|---------------|-----------------|--------------|------|
| Top 12                                     | 79.77        | 80.36         | 79.77           | 79.95        | 0.82 |
| Top 13                                     | 83.21        | 83.76         | 83.21           | 83.32        | 0.85 |
| Top 14                                     | 86.64        | 86.70         | 86.64           | 86.66        | 0.88 |
| Top 15                                     | 85.11        | 85.15         | 85.11           | 85.13        | 0.87 |
| Top 16                                     | 89.31        | 89.47         | 89.31           | 89.36        | 0.90 |
| Top 17                                     | 88.55        | 88.79         | 88.55           | 88.63        | 0.89 |
| Top 18                                     | 87.79        | 88.41         | 87.79           | 87.93        | 0.87 |
| Top 19                                     | 90.84        | 91.18         | 90.84           | 90.92        | 0.91 |
| Top 20                                     | 93.51        | 93.80         | 93.51           | 93.58        | 0.94 |
| Top 21                                     | 90.46        | 90.90         | 90.46           | 90.57        | 0.90 |
| Top 22                                     | 90.46        | 90.59         | 90.46           | 90.50        | 0.90 |

**Table S16.** Performance evaluation matrix using features from GL, VL, and TA muscles EMG for different feature selection techniques.

| A Chi Square feature Ranking Technique     |              |               |                 |              |      |
|--------------------------------------------|--------------|---------------|-----------------|--------------|------|
| Incremental combination of Ranked features | Accuracy (%) | Precision (%) | Sensitivity (%) | F1-Score (%) | AUC  |
| Top 25                                     | 95.04        | 95.08         | 95.04           | 95.03        | 0.98 |
| Top 26                                     | 94.27        | 94.35         | 94.27           | 94.26        | 0.95 |
| Top 27                                     | 95.80        | 95.86         | 95.80           | 95.78        | 0.99 |
| Top 28                                     | 94.27        | 94.38         | 94.27           | 94.25        | 0.97 |
| Top 29                                     | 95.80        | 95.86         | 95.80           | 95.79        | 0.99 |
| Top 30                                     | 93.51        | 93.72         | 93.51           | 93.50        | 0.99 |
| Top 31                                     | 95.42        | 95.42         | 95.42           | 95.40        | 0.98 |
| Top 32                                     | 94.27        | 94.30         | 94.27           | 94.26        | 0.98 |
| Top 33                                     | 94.27        | 94.42         | 94.27           | 94.26        | 0.98 |
| Top 34                                     | 95.42        | 95.55         | 95.42           | 95.41        | 0.99 |
| Top 35                                     | 95.04        | 95.09         | 95.04           | 95.00        | 0.98 |
| B mrmr feature Ranking Technique           |              |               |                 |              |      |
| Incremental combination of Ranked features | Accuracy (%) | Precision (%) | Sensitivity (%) | F1-Score (%) | AUC  |
| Top 28                                     | 92.75        | 92.94         | 92.75           | 92.68        | 0.97 |
| Top 29                                     | 92.37        | 92.46         | 92.37           | 92.34        | 0.95 |
| Top 30                                     | 90.46        | 90.67         | 90.46           | 90.40        | 0.96 |
| Top 31                                     | 91.60        | 91.60         | 91.60           | 91.59        | 0.95 |
| Top 32                                     | 91.98        | 92.32         | 91.98           | 91.92        | 0.97 |
| Top 33                                     | 94.27        | 94.43         | 94.27           | 94.24        | 0.99 |
| Top 34                                     | 93.89        | 94.03         | 93.89           | 93.88        | 0.97 |
| Top 35                                     | 94.66        | 94.67         | 94.66           | 94.65        | 0.98 |
| Top 36                                     | 93.89        | 93.92         | 93.89           | 93.88        | 0.97 |
| Top 37                                     | 93.13        | 93.16         | 93.13           | 93.12        | 0.97 |
| Top 38                                     | 95.42        | 95.68         | 95.42           | 95.41        | 0.98 |
| C relieff feature Ranking Technique        |              |               |                 |              |      |
| Incremental combination of Ranked features | Accuracy (%) | Precision (%) | Sensitivity (%) | F1-Score (%) | AUC  |

|                                            |                                  |               |                 |              |      |
|--------------------------------------------|----------------------------------|---------------|-----------------|--------------|------|
| Top 20                                     | 91.98                            | 92.03         | 91.98           | 91.98        | 0.97 |
| Top 21                                     | 95.42                            | 95.48         | 95.42           | 95.40        | 0.97 |
| Top 22                                     | 92.75                            | 92.85         | 92.75           | 92.71        | 0.97 |
| Top 23                                     | 95.80                            | 95.86         | 95.80           | 95.80        | 0.97 |
| Top 24                                     | 93.13                            | 93.23         | 93.13           | 93.09        | 0.97 |
| Top 25                                     | 92.75                            | 92.97         | 92.75           | 92.70        | 0.96 |
| Top 26                                     | 93.51                            | 93.55         | 93.51           | 93.49        | 0.96 |
| Top 27                                     | 93.13                            | 93.14         | 93.13           | 93.11        | 0.97 |
| Top 28                                     | 93.89                            | 93.87         | 93.89           | 93.85        | 0.98 |
| Top 29                                     | 94.66                            | 94.66         | 94.66           | 94.65        | 0.97 |
| Top 30                                     | 93.89                            | 93.90         | 93.89           | 93.87        | 0.97 |
| D                                          | fscnca feature Ranking Technique |               |                 |              |      |
| Incremental combination of Ranked features | Accuracy (%)                     | Precision (%) | Sensitivity (%) | F1-Score (%) | AUC  |
| Top 28                                     | 93.89                            | 93.97         | 93.89           | 93.87        | 0.98 |
| Top 29                                     | 92.75                            | 92.89         | 92.75           | 92.70        | 0.96 |
| Top 30                                     | 94.66                            | 94.71         | 94.66           | 94.64        | 0.97 |
| Top 31                                     | 92.75                            | 92.79         | 92.75           | 92.72        | 0.97 |
| Top 32                                     | 93.51                            | 93.58         | 93.51           | 93.50        | 0.97 |
| Top 33                                     | 93.51                            | 93.53         | 93.51           | 93.50        | 0.99 |
| Top 34                                     | 93.89                            | 93.92         | 93.89           | 93.86        | 0.97 |
| Top 35                                     | 93.13                            | 93.19         | 93.13           | 93.14        | 0.97 |
| Top 36                                     | 95.04                            | 95.04         | 95.04           | 95.03        | 0.98 |
| Top 37                                     | 92.37                            | 92.41         | 92.37           | 92.34        | 0.96 |
| Top 38                                     | 95.04                            | 95.15         | 95.04           | 95.01        | 0.97 |

Table S17. Feature list from different Selection Techniques from GRFx.

| Ranking | Chi Square                       | mrmr                                              | relieff                             | fscnca                                            |
|---------|----------------------------------|---------------------------------------------------|-------------------------------------|---------------------------------------------------|
| 1       | 'GRFx Enhanced Wave form length' | 'GRFx Wave form length'                           | ' GRFx Mean'                        | ' GRFx Simple square integral'                    |
| 2       | ' GRFx Quantile range'           | ' GRFx Irregularity Factor'                       | 'GRFx Enhanced Wave form length'    | ' GRFx Peak to Peak'                              |
| 3       | ' GRFx Myopluse percentage rate' | ' GRFx Auto regressive 3'                         | ' GRFx Myopluse percentage rate'    | ' GRFx Final/min'                                 |
| 4       | 'GRFx Wave form length'          | ' GRFx Sqrt of Variance'                          | 'GRFx Wave form length'             | ' GRFx Quantile range'                            |
| 5       | ' GRFx Mean'                     | ' GRFx Max/min ratio'                             | ' GRFx Slope sign change'           | ' GRFx Modified mean absolute value 1'            |
| 6       | ' GRFx Waveform length ratio'    | ' GRFx Spectral entropy'                          | ' GRFx Quantile range'              | 'GRFx Enhanced Wave form length'                  |
| 7       | ' GRFx Third quantile'           | ' GRFx Maximum Fractal length'                    | ' GRFx Simple square integral'      | ' GRFx Modified mean absolute value 2'            |
| 8       | ' GRFx Slope sign change'        | ' GRFx Waveform length ratio'                     | 'GRFx Enhanced mean Absolute Value' | ' GRFx Difference Between 0th & 4th order moment' |
| 9       | ' GRFx Median frequency '        | ' GRFx Slope sign change'                         | ' GRFx Waveform length ratio'       | ' GRFx Myopluse percentage rate'                  |
| 10      | ' GRFx Simple square integral'   | ' GRFx Difference Between 0th & 4th order moment' | ' GRFx Sqrt of Variance'            | ' GRFx Mean frequency '                           |

|    |                                                  |                                       |                                                  |                                     |
|----|--------------------------------------------------|---------------------------------------|--------------------------------------------------|-------------------------------------|
| 11 | 'GRFx Descriptor SE Upper Bound'                 | 'GRFx Mean'                           | 'GRFx Modified mean absolute value 2'            | 'GRFx Mean'                         |
| 12 | 'GRFx Enhanced mean Absolute Value'              | 'GRFx Enhanced Wave form length'      | 'GRFx Final/min'                                 | 'GRFx Auto regressive 2'            |
| 13 | 'GRFx Final/min'                                 | 'GRFx Simple square integral'         | 'GRFx Third quantile'                            | 'GRFx Enhanced mean Absolute Value' |
| 14 | 'GRFx Coefficient of variation'                  | 'GRFx Myopluse percentage rate'       | 'GRFx Modified mean absolute value 1'            | 'GRFx Sigma(signal entropy)'        |
| 15 | 'GRFx Max/min ratio'                             | 'GRFx Modified mean absolute value 2' | 'GRFx Peak to Peak'                              | 'GRFx Total Energy'                 |
| 16 | 'GRFx Spectral entropy'                          | 'GRFx Estimate (signal entropy)'      | 'GRFx Median frequency '                         | 'GRFx Average power'                |
| 17 | 'GRFx First quantile'                            | 'GRFx Quantile range'                 | 'GRFx Coefficient of variation'                  | 'GRFx Max value '                   |
| 18 | 'GRFx Estimate (signal entropy)'                 | 'GRFx Enhanced mean Absolute Value'   | 'GRFx Irregularity Factor'                       | 'GRFx Max ratio'                    |
| 19 | 'GRFx Shape factor'                              | 'GRFx Third quantile'                 | 'GRFx Auto regressive 2'                         | 'GRFx Willison amplitude'           |
| 20 | 'GRFx RMS'                                       | 'GRFx Mean absolute Value'            | 'GRFx First quantile'                            | 'GRFx Descriptor SE Upper Bound'    |
| 21 | 'GRFx Irregularity Factor'                       | 'GRFx Final/min'                      | 'GRFx Zero order moment'                         | 'GRFx Max/min ratio'                |
| 22 | 'GRFx Average power'                             | 'GRFx Coefficient of variation'       | 'GRFx Mean frequency '                           | 'GRFx Average amplitude change'     |
| 23 | 'GRFx Sqrt of Variance'                          | 'GRFx First quantile'                 | 'GRFx Total Energy'                              | 'GRFx Time to peak'                 |
| 24 | 'GRFx Sigma(signal entropy)'                     | 'GRFx Auto regressive 4'              | 'GRFx Difference Between 0th & 4th order moment' | 'GRFx Sparseness'                   |
| 25 | 'GRFx Mean frequency '                           | 'GRFx Peak'                           | 'GRFx Average amplitude change'                  | 'GRFx Log detector'                 |
| 26 | 'GRFx Max value '                                | 'GRFx Signal skewness'                | 'GRFx Max/min ratio'                             | 'GRFx Shape factor'                 |
| 27 | 'GRFx Auto regressive 2'                         | 'GRFx Zero crossing'                  | 'GRFx Max value '                                | 'GRFx Integrated absolute value'    |
| 28 | 'GRFx Max frequency'                             | 'GRFx RMS'                            | 'GRFx RMS'                                       | 'GRFx Waveform length ratio'        |
| 29 | 'GRFx Peak'                                      | 'GRFx Average power'                  | 'GRFx Log detector'                              | 'GRFx Slope sign change'            |
| 30 | 'GRFx Difference Between 0th & 4th order moment' | 'GRFx Integrated absolute value'      | 'GRFx Spectral entropy'                          | 'GRFx Peak'                         |
| 31 | 'GRFx Zero order moment'                         | 'GRFx Max frequency'                  | 'GRFx Time to peak'                              | 'GRFx Zero crossing'                |
| 32 | 'GRFx Sparseness'                                | 'GRFx Max value '                     | 'GRFx Sigma(signal entropy)'                     | 'GRFx Signal skewness'              |
| 33 | 'GRFx Maximum Fractal length'                    | 'GRFx Signal Kurtosis'                | 'GRFx Sparseness'                                | 'GRFx Wave form length'             |
| 34 | 'GRFx Peak to Peak'                              | 'GRFx Shape factor'                   | 'GRFx Average power'                             | 'GRFx Max frequency'                |
| 35 | 'GRFx Zero crossing'                             | 'GRFx Zero order moment'              | 'GRFx Difference absolute standard deviation '   | 'GRFx Descriptor SE Lower Bound'    |
| 36 | 'GRFx Average amplitude change'                  | 'GRFx Max ratio'                      | 'GRFx Max frequency'                             | 'GRFx Standard Deviation'           |

Table S18. Feature list from different Selection Techniques from GRFy.

| Ranking | Chi Square | mrmr | relieff | fscnca |
|---------|------------|------|---------|--------|
|---------|------------|------|---------|--------|

|    |                                                   |                                                   |                                                   |                                                   |
|----|---------------------------------------------------|---------------------------------------------------|---------------------------------------------------|---------------------------------------------------|
| 1  | 'GRFy Enhanced mean Absolute Value'               |
| 2  | ' GRFy Modified mean absolute value 2'            | ' GRFy First quantile'                            | ' GRFy Auto regressive 3'                         | ' GRFy Time to peak'                              |
| 3  | ' GRFy Final/min'                                 | ' GRFy Slope sign change'                         | ' GRFy Modified mean absolute value 2'            | ' GRFy Zero crossing'                             |
| 4  | ' GRFy Signal Kurtosis'                           | ' GRFy Difference Between 0th & 2nd order moment' | ' GRFy Final/min'                                 | ' GRFy Slope sign change'                         |
| 5  | ' GRFy Mean'                                      | ' GRFy Average amplitude change'                  | ' GRFy Signal Kurtosis'                           | ' GRFy Total Energy'                              |
| 6  | ' GRFy Difference Between 0th & 2nd order moment' | ' GRFy Quantile range'                            | ' GRFy Myopluse percentage rate'                  | ' GRFy Auto regressive 3'                         |
| 7  | ' GRFy Auto regressive 1'                         | ' GRFy Shape factor'                              | ' GRFy Zero crossing'                             | ' GRFy Auto regressive 2'                         |
| 8  | ' GRFy First quantile'                            | ' GRFy Signal skewness'                           | ' GRFy Slope sign change'                         | ' GRFy Standard Deviation'                        |
| 9  | ' GRFy Time to peak'                              | ' GRFy Final/min'                                 | ' GRFy Mean'                                      | ' GRFy Average power'                             |
| 10 | ' GRFy Descriptor SE NCELL'                       | ' GRFy Myopluse percentage rate'                  | ' GRFy Difference Between 0th & 2nd order moment' | ' GRFy Modified mean absolute value 2'            |
| 11 | ' GRFy Max/min ratio'                             | ' GRFy Difference Between 0th & 4th order moment' | ' GRFy Third quantile'                            | ' GRFy Maximum Fractal length'                    |
| 12 | ' GRFy Sparseness'                                | ' GRFy Mean'                                      | ' GRFy Time to peak'                              | ' GRFy Final/min'                                 |
| 13 | ' GRFy Waveform length ratio'                     | ' GRFy Modified mean absolute value 2'            | ' GRFy Descriptor SE Upper Bound'                 | 'GRFy Wave form length'                           |
| 14 | ' GRFy Myopluse percentage rate'                  | ' GRFy Descriptor SE Upper Bound'                 | ' GRFy Auto regressive 2'                         | 'GRFy Mean absolute Value'                        |
| 15 | ' GRFy Estimate (signal entropy)'                 | ' GRFy Max/min ratio'                             | ' GRFy First quantile'                            | ' GRFy Zero order moment'                         |
| 16 | ' GRFy Irregularity Factor'                       | ' GRFy Signal Kurtosis'                           | ' GRFy Signal skewness'                           | ' GRFy Signal Kurtosis'                           |
| 17 | ' GRFy Signal skewness'                           | ' GRFy Auto regressive 1'                         | ' GRFy Sparseness'                                | ' GRFy Sqrt of Variance'                          |
| 18 | ' GRFy Auto regressive 2'                         | 'GRFy Wave form length'                           | ' GRFy Willison amplitude'                        | ' GRFy First quantile'                            |
| 19 | ' GRFy Auto regressive 3'                         | ' GRFy Irregularity Factor'                       | ' GRFy Descriptor SE NCELL'                       | ' GRFy Integrated absolute value'                 |
| 20 | ' GRFy Coefficient of variation'                  | ' GRFy Waveform length ratio'                     | ' GRFy Auto regressive 1'                         | ' GRFy Max/min ratio'                             |
| 21 | ' GRFy Slope sign change'                         | 'GRFy Enhanced Wave form length'                  | 'GRFy Mean absolute Value'                        | 'GRFy Enhanced Wave form length'                  |
| 22 | ' GRFy Zero crossing'                             | ' GRFy Descriptor SE NCELL'                       | ' GRFy Standard Deviation'                        | ' GRFy Willison amplitude'                        |
| 23 | 'GRFy Wave form length'                           | ' GRFy RMS'                                       | 'GRFy Wave form length'                           | ' GRFy Shape factor'                              |
| 24 | ' GRFy Auto regressive 4'                         | 'GRFy Mean absolute Value'                        | 'GRFy Enhanced Wave form length'                  | ' GRFy Descriptor SE Lower Bound'                 |
| 25 | ' GRFy Third quantile'                            | ' GRFy Total Energy'                              | ' GRFy Simple square integral'                    | ' GRFy Estimate (signal entropy)'                 |
| 26 | ' GRFy Descriptor SE Upper Bound'                 | 'GRFy Descriptor SE Lower Bound'                  | ' GRFy Peak to Peak'                              | ' GRFy Descriptor SE Upper Bound'                 |
| 27 | ' GRFy Modified mean absolute value 1'            | ' GRFy Zero order moment'                         | ' GRFy Waveform length ratio'                     | ' GRFy Mean'                                      |
| 28 | ' GRFy Integrated absolute value'                 | ' GRFy Willison amplitude'                        | ' GRFy Average power'                             | ' GRFy Modified mean absolute value 1'            |
| 29 | ' GRFy Log detector'                              | ' GRFy Peak to Peak'                              | ' GRFy Maximum Fractal length'                    | ' GRFy Difference Between 0th & 2nd order moment' |

|    |                                                  |                                       |                                  |                                               |
|----|--------------------------------------------------|---------------------------------------|----------------------------------|-----------------------------------------------|
| 30 | 'GRFy Difference Between 0th & 4th order moment' | 'GRFy Modified mean absolute value 1' | 'GRFy Max/min ratio'             | 'GRFy Quantile range'                         |
| 31 | 'GRFy Maximum Fractal length'                    | 'GRFy Standard Deviation'             | 'GRFy Quantile range'            | 'GRFy Descriptor SE NCELL'                    |
| 32 | 'GRFy Descriptor SE Lower Bound'                 | 'GRFy Time to peak'                   | 'GRFy Sqrt of Variance'          | 'GRFy Log detector'                           |
| 33 | 'GRFy Total Energy'                              | 'GRFy Integrated absolute value'      | 'GRFy Zero order moment'         | 'GRFy Difference absolute standard deviation' |
| 34 | 'GRFy Difference absolute standard deviation'    | 'GRFy Auto regressive 4'              | 'GRFy Estimate (signal entropy)' | 'GRFy Variance'                               |
| 35 | 'GRFy Mean absolute Value'                       | 'GRFy Sparseness'                     | 'GRFy Sigma(signal entropy)'     | 'GRFy Auto regressive 4'                      |
| 36 | 'GRFy Average power'                             | 'GRFy Maximum Fractal length'         | 'GRFy Average amplitude change'  | 'GRFy Third quantile'                         |

Table S19. Feature list from different Selection Techniques from GRFz.

| Ranking | Chi Square                                       | mrmr                                          | relieff                                       | fscnca                                        |
|---------|--------------------------------------------------|-----------------------------------------------|-----------------------------------------------|-----------------------------------------------|
| 1       | 'GRFz Enhanced mean Absolute Value'              | 'GRFz Enhanced mean Absolute Value'           | 'GRFz Auto regressive 1'                      | 'GRFz Enhanced mean Absolute Value'           |
| 2       | 'GRFz Auto regressive 2'                         | 'GRFz Sigma(signal entropy)'                  | 'GRFz Enhanced mean Absolute Value'           | 'GRFz Log detector'                           |
| 3       | 'GRFz Difference Between 0th & 4th order moment' | 'GRFz Willison amplitude'                     | 'GRFz Difference absolute standard deviation' | 'GRFz Descriptor SE Upper Bound'              |
| 4       | 'GRFz Log detector'                              | 'GRFz Mean absolute Value'                    | 'GRFz Auto regressive 2'                      | 'GRFz Difference absolute standard deviation' |
| 5       | 'GRFz Sigma(signal entropy)'                     | 'GRFz Difference absolute standard deviation' | 'GRFz Mean absolute Value'                    | 'GRFz Willison amplitude'                     |
| 6       | 'GRFz Auto regressive 4'                         | 'GRFz Average power'                          | 'GRFz Descriptor SE Upper Bound'              | 'GRFz Standard Deviation'                     |
| 7       | 'GRFz Slope sign change'                         | 'GRFz Log detector'                           | 'GRFz Log detector'                           | 'GRFz Average amplitude change'               |
| 8       | 'GRFz Zero crossing'                             | 'GRFz Zero crossing'                          | 'GRFz Standard Deviation'                     | 'GRFz Auto regressive 3'                      |
| 9       | 'GRFz Enhanced Wave form length'                 | 'GRFz Sqrt of Variance'                       | 'GRFz Zero order moment'                      | 'GRFz Sqrt of Variance'                       |
| 10      | 'GRFz Modified mean absolute value 1'            | 'GRFz Variance'                               | 'GRFz Zero crossing'                          | 'GRFz RMS'                                    |
| 11      | 'GRFz Auto regressive 1'                         | 'GRFz Modified mean absolute value 2'         | 'GRFz Sigma(signal entropy)'                  | 'GRFz Zero order moment'                      |
| 12      | 'GRFz Willison amplitude'                        | 'GRFz Enhanced Wave form length'              | 'GRFz Willison amplitude'                     | 'GRFz Average power'                          |
| 13      | 'GRFz Estimate (signal entropy)'                 | 'GRFz Modified mean absolute value 1'         | 'GRFz Slope sign change'                      | 'GRFz Wave form length'                       |
| 14      | 'GRFz Zero order moment'                         | 'GRFz Auto regressive 2'                      | 'GRFz RMS'                                    | 'GRFz Integrated absolute value'              |

|    |                                                        |                                                        |                                                        |                                                        |
|----|--------------------------------------------------------|--------------------------------------------------------|--------------------------------------------------------|--------------------------------------------------------|
| 15 | 'GRFz Difference<br>absolute standard deviation'       | 'GRFz Auto regressive 1'                               | 'GRFz Average power'                                   | 'GRFz Modified mean<br>absolute value 1'               |
| 16 | 'GRFz Descriptor SE<br>Upper Bound'                    | 'GRFz RMS'                                             | 'GRFz Total Energy'                                    | 'GRFz Modified mean<br>absolute value 2'               |
| 17 | 'GRFz Shape factor'                                    | 'GRFz Estimate (signal<br>entropy)'                    | 'GRFz Peak to Peak'                                    | 'GRFz Mean absolute<br>Value'                          |
| 18 | 'GRFz Difference<br>Between 0th & 2nd order<br>moment' | 'GRFz Peak to Peak'                                    | 'GRFz Integrated<br>absolute value'                    | 'GRFz Difference<br>Between 0th & 2nd order<br>moment' |
| 19 | 'GRFz RMS'                                             | 'GRFz Slope sign change'                               | 'GRFz Estimate (signal<br>entropy)'                    | 'GRFz Auto regressive 1'                               |
| 20 | 'GRFz Mean absolute<br>Value'                          | 'GRFz Descriptor SE<br>Upper Bound'                    | 'GRFz Difference<br>Between 0th & 4th order<br>moment' | 'GRFz Slope sign change'                               |
| 21 | 'GRFz Modified mean<br>absolute value 2'               | 'GRFz Difference<br>Between 0th & 4th order<br>moment' | 'GRFz Average<br>amplitude change'                     | 'GRFz Difference<br>Between 0th & 4th order<br>moment' |
| 22 | 'GRFz Integrated<br>absolute value'                    | 'GRFz Zero order<br>moment'                            | 'GRFz Descriptor SE<br>NCELL'                          | 'GRFz Enhanced Wave<br>form length'                    |
| 23 | 'GRFz Average power'                                   | 'GRFz Maximum Fractal<br>length'                       | 'GRFz Auto regressive 4'                               | 'GRFz Descriptor SE<br>Lower Bound'                    |
| 24 | 'GRFz Peak to Peak'                                    | 'GRFz Total Energy'                                    | 'GRFz Enhanced Wave<br>form length'                    | 'GRFz Simple square<br>integral'                       |
| 25 | 'GRFz Standard<br>Deviation'                           | 'GRFz Shape factor'                                    | 'GRFz Modified mean<br>absolute value 1'               | 'GRFz Zero crossing'                                   |
| 26 | 'GRFz Total Energy'                                    | 'GRFz Myopluse<br>percentage rate'                     | 'GRFz Auto regressive 3'                               | 'GRFz Variance'                                        |
| 27 | 'GRFz Maximum Fractal<br>length'                       | 'GRFz Auto regressive 3'                               | 'GRFz Sqrt of Variance'                                | 'GRFz Maximum Fractal<br>length'                       |
| 28 | 'GRFz Descriptor SE<br>NCELL'                          | 'GRFz Average<br>amplitude change'                     | 'GRFz Descriptor SE<br>Lower Bound'                    | 'GRFz Descriptor SE<br>NCELL'                          |
| 29 | 'GRFz Variance'                                        | 'GRFz Simple square<br>integral'                       | 'GRFz Difference<br>Between 0th & 2nd order<br>moment' | 'GRFz Sigma(signal<br>entropy)'                        |
| 30 | 'GRFz Auto regressive 3'                               | 'GRFz Descriptor SE<br>Lower Bound'                    | 'GRFz Modified mean<br>absolute value 2'               | 'GRFz Myopluse<br>percentage rate'                     |
| 31 | 'GRFz Average<br>amplitude change'                     | 'GRFz Descriptor SE<br>NCELL'                          | 'GRFz Maximum Fractal<br>length'                       | 'GRFz Shape factor'                                    |
| 32 | 'GRFz Sqrt of Variance'                                | 'GRFz Difference<br>Between 0th & 2nd order<br>moment' | 'GRFz Shape factor'                                    | 'GRFz Auto regressive 4'                               |
| 33 | 'GRFz Descriptor SE<br>Lower Bound'                    | 'GRFz Wave form length'                                | 'GRFz Wave form length'                                | 'GRFz Peak to Peak'                                    |
| 34 | 'GRFz Wave form length'                                | 'GRFz Standard<br>Deviation'                           | 'GRFz Simple square<br>integral'                       | 'GRFz Auto regressive 2'                               |
| 35 | 'GRFz Simple square<br>integral'                       | 'GRFz Auto regressive 4'                               | 'GRFz Variance'                                        | 'GRFz Estimate (signal<br>entropy)'                    |
| 36 | 'GRFz Myopluse<br>percentage rate'                     | 'GRFz Integrated<br>absolute value'                    | 'GRFz Myopluse<br>percentage rate'                     | 'GRFz Total Energy'                                    |

**Table S20.** Feature list from different Selection Techniques from GRFx-GRFy.

|    | <b>Chi Square</b>                      | <b>mrmr</b>                                      | <b>relieff</b>                                   | <b>fscnca</b>                    |
|----|----------------------------------------|--------------------------------------------------|--------------------------------------------------|----------------------------------|
| 1  | 'GRFy Integrated absolute value'       | 'GRFx Time to peak'                              | 'GRFx Max Fractal length cD3'                    | 'GRFx Max Fractal length cD8'    |
| 2  | 'GRFx Enhanced Wave form length'       | 'GRFy Max Fractal length cD1'                    | 'GRFx Standard Deviation D2'                     | 'GRFx PS kurtosis'               |
| 3  | 'GRFy Spectral slope'                  | 'GRFy Zero order moment'                         | 'GRFx Auto regressive 2'                         | 'GRFx Standard Deviation cA8'    |
| 4  | 'GRFx Mean absolute Value D7'          | 'GRFy Band power of cD5'                         | 'GRFy Difference Between 0th & 2nd order moment' | 'GRFx Mean absolute value cD4'   |
| 5  | 'GRFy First peak '                     | 'GRFx Mean absolute value cD5'                   | 'GRFy Max Fractal length cD3'                    | 'GRFy Wave form length'          |
| 6  | 'GRFx Mean absolute value cD2'         | 'GRFx Difference Between 0th & 2nd order moment' | 'GRFx RMS D1'                                    | 'GRFx Waveform length cA8'       |
| 7  | 'GRFx Descriptor SE Lower Bound'       | 'GRFx Band power of cD1'                         | 'GRFx Descriptor SE NCELL'                       | 'GRFx Wavelet entropy level 6'   |
| 8  | 'GRFy Mean absolute value D3'          | 'GRFx RMS cD2'                                   | 'GRFx Standard Deviation A6'                     | 'GRFy Mean absolute value D1'    |
| 9  | 'GRFx Mean absolute value D8'          | 'GRFy Waveform length cD7'                       | 'GRFx Band power of cD7'                         | 'GRFy Standard Deviation D5'     |
| 10 | 'GRFx Spectral slope'                  | 'GRFx Standard Deviation cD7'                    | 'GRFx Mean absolute value cD7'                   | 'GRFy Integrated absolute value' |
| 11 | 'GRFy Mean absolute value D1'          | 'GRFx Powe spectral (PS) skewness'               | 'GRFy Mean absolute value cD3'                   | 'GRFx Mean frequency '           |
| 12 | 'GRFy Max Fractal length cD4'          | 'GRFy Standard Deviation cD8'                    | 'GRFy Max Fractal length cA8'                    | 'GRFy Descriptor SE Lower Bound' |
| 13 | 'GRFy Spectral kurtosis'               | 'GRFx Zero order moment'                         | 'GRFx Standard Deviation cD6'                    | 'GRFy Spectral spread'           |
| 14 | 'GRFy Spectral decrease'               | 'GRFx Standard Deviation A6'                     | 'GRFy Waveform length D1'                        | 'GRFx RMS A6'                    |
| 15 | 'GRFy Mean frequency '                 | 'GRFy Band power of D8'                          | 'GRFy Band power of cD6'                         | 'GRFx Max Fractal length D6'     |
| 16 | 'GRFx Willison amplitude'              | 'GRFy Mean absolute value A8'                    | 'GRFy Spectral deformation '                     | 'GRFx Mean absolute value cD3'   |
| 17 | 'GRFx Wavelet entropy level 8'         | 'GRFy Descriptor SE Lower Bound'                 | 'GRFy Max frequency'                             | 'GRFx Standard Deviation D1'     |
| 18 | 'GRFx Descriptor SE NCELL'             | 'GRFy Modified mean absolute value 1'            | 'GRFx Mean absolute value cD6'                   | 'GRFy Variance'                  |
| 19 | 'GRFx Max Fractal length cD2'          | 'GRFx Standard Deviation'                        | 'GRFy Max Fractal length cD8'                    | 'GRFy Maximum Fractal length'    |
| 20 | 'GRFy Max Fractal length D1'           | 'GRFx Wavelet entropy level 6'                   | 'GRFx Standard Deviation'                        | 'GRFy PS median frequency'       |
| 21 | 'GRFy Max Fractal length D2'           | 'GRFx RMS cD1'                                   | 'GRFy Waveform length cD1'                       | 'GRFy Waveform length cD7'       |
| 22 | 'GRFy Max Fractal length D5'           | 'GRFy Standard Deviation cD3'                    | 'GRFx RMS cD1'                                   | 'GRFx RMS A8'                    |
| 23 | 'GRFx Signal to motion artifact ratio' | 'GRFx Mean absolute value A6'                    | 'GRFy Estimate (signal entropy)'                 | 'GRFy Band power of cD6'         |
| 24 | 'GRFy Second peak'                     | 'GRFx RMS cD4'                                   | 'GRFx Waveform length cD3'                       | 'GRFy Standard Deviation D1'     |

|    |                                                      |                                                      |                                                      |                                      |
|----|------------------------------------------------------|------------------------------------------------------|------------------------------------------------------|--------------------------------------|
| 25 | ' GRFx Mean absolute value<br>cA8'                   | ' GRFx Waveform length<br>cA8'                       | ' GRFy Mean absolute value<br>cD5'                   | ' GRFx Sigma(signal<br>entropy)'     |
| 26 | ' GRFy Spectral centroid'                            | ' GRFy Difference Between<br>0th & 4th order moment' | ' GRFx Mean absolute value<br>D4'                    | ' GRFx Mean absolute value<br>A6'    |
| 27 | ' GRFy Powe spectral (PS)<br>skewness'               | ' GRFy Spectral crest'                               | ' GRFx Spectral centroid'                            | ' GRFx Band power of D8'             |
| 28 | ' GRFx Band power of cD2'                            | ' GRFx Max Fractal length<br>D5'                     | ' GRFy Waveform length<br>cD8'                       | ' GRFy Waveform length<br>D7'        |
| 29 | ' GRFx Difference Between<br>0th & 4th order moment' | ' GRFy Wavelet entropy<br>level 6'                   | ' GRFy Wavelet entropy<br>level 8'                   | ' GRFx Max to min drop of<br>PS'     |
| 30 | ' GRFy Wavelet entropy<br>level 4'                   | ' GRFx Max Fractal length<br>cD7'                    | ' GRFx RMS cD4'                                      | ' GRFy Signal Kurtosis'              |
| 31 | ' GRFx Mean absolute value<br>cD4'                   | ' GRFy Standard Deviation<br>D2'                     | ' GRFy Band power of D7'                             | ' GRFx Log detector'                 |
| 32 | ' GRFy Band power of D2'                             | ' GRFy Difference Between<br>0th & 2nd order moment' | ' GRFx Difference Between<br>0th & 2nd order moment' | ' GRFy Mean absolute value<br>cD1'   |
| 33 | ' GRFx Wavelet entropy<br>level 6'                   | ' GRFy Max Fractal length<br>cD8'                    | ' GRFy Myopluse<br>percentage rate'                  | ' GRFx Enhanced Wave form<br>length' |
| 34 | ' GRFy Difference Between<br>0th & 4th order moment' | ' GRFx Max Fractal length<br>cD2'                    | ' GRFy Mean absolute value<br>D3'                    | ' GRFy Shape factor'                 |
| 35 | ' GRFy Signal to motion<br>artifact ratio'           | ' GRFx Auto regressive 2'                            | ' GRFx Mean absolute value<br>A6'                    | ' GRFy Band power of D3'             |
| 36 | ' GRFx Waveform length<br>D2'                        | ' GRFx Spectral spread'                              | ' GRFy Wavelet entropy<br>level 6'                   | ' GRFx Waveform length<br>D5'        |
| 37 | ' GRFy Max Fractal length<br>cD2'                    | ' GRFy Standard Deviation<br>D8'                     | ' GRFy Band power of cD3'                            | ' GRFy Sigma(signal<br>entropy)'     |
| 38 | ' GRFx Peak'                                         | ' GRFy Estimate (signal<br>entropy)'                 | ' GRFx Max Fractal length<br>D5'                     | ' GRFy Spectral entropy'             |
| 39 | ' GRFx Max ratio'                                    | ' GRFx RMS D6'                                       | ' GRFy Mean'                                         | ' GRFy RMS D4'                       |
| 40 | ' GRFx First quantile'                               | ' GRFx tandard Deviation<br>D7'                      | ' GRFx Mean absolute value<br>cD4'                   | ' GRFx Band power of cD4'            |
| 41 | ' GRFx Shape factor'                                 | ' GRFx Difference absolute<br>standard deviation '   | ' GRFx Signal Kurtosis'                              | ' GRFx Standard Deviation<br>A8'     |
| 42 | ' GRFx Spectral roll off point<br>,                  | ' GRFy PS median<br>frequency'                       | ' GRFx Mean absolute value<br>D2'                    | ' GRFy Max Fractal length<br>cD1'    |
| 43 | ' GRFx Signal Kurtosis'                              | ' GRFy Zero crossing'                                | ' GRFx Max Fractal length<br>D8'                     | ' GRFy Average power'                |
| 44 | ' GRFy Max frequency'                                | ' GRFx Wave form length'                             | ' GRFy Mean absolute value<br>cA8'                   | ' GRFy Waveform length<br>D6'        |
| 45 | ' GRFy Shape factor'                                 | ' GRFx Modified mean<br>absolute value 1'            | ' GRFx Modified mean<br>absolute value 2'            | ' GRFx Mean absolute value<br>cD1'   |
| 46 | ' GRFx Spectral skewness'                            | ' GRFx RMS A8'                                       | ' GRFy Powe spectral (PS)<br>skewness'               | ' GRFx RMS cD5'                      |
| 47 | ' GRFx Max Fractal length<br>D2'                     | ' GRFx Waveform length D8'                           | ' GRFx Max Fractal length<br>D4'                     | ' GRFx Band power of D1'             |
| 48 | ' GRFx Max Fractal length<br>cD3'                    | ' GRFy Mean'                                         | ' GRFy PS median<br>frequency'                       | ' GRFx Waveform length<br>D6'        |
| 49 | ' GRFx First peak '                                  | ' GRFx Band power of D6'                             | ' GRFx Mean absolute value<br>D1'                    | ' GRFy RMS cD6'                      |



|    |                                 |                                        |                                               |                                                  |
|----|---------------------------------|----------------------------------------|-----------------------------------------------|--------------------------------------------------|
| 50 | 'GRFy Myopluse percentage rate' | 'GRFy Spectral kurtosis'               | 'GRFx Spectral crest'                         | 'GRFy Waveform length cD2'                       |
| 51 | 'GRFy Max ratio'                | 'GRFy Spectral decrease'               | 'GRFx Standard Deviation cA8'                 | 'GRFx Difference absolute standard deviation'    |
| 52 | 'GRFy Wavelet entropy level 8'  | 'GRFy Waveform length A8'              | 'GRFx Enhanced Wave form length'              | 'GRFx Shape factor'                              |
| 53 | 'GRFy Spectral deformation'     | 'GRFx Willison amplitude'              | 'GRFx Waveform length D6'                     | 'GRFy Standard Deviation cD5'                    |
| 54 | 'GRFx Wavelet entropy level 4'  | 'GRFx Standard Deviation cD2'          | 'GRFy Standard Deviation cD6'                 | 'GRFx Waveform length cD1'                       |
| 55 | 'GRFy Sigma(signal entropy)'    | 'GRFy RMS D2'                          | 'GRFx Max Fractal length D2'                  | 'GRFx Third quantile'                            |
| 56 | 'GRFx Max Fractal length cD4'   | 'GRFx Standard Deviation D5'           | 'GRFx First peak'                             | 'GRFy PS kurtosis'                               |
| 57 | 'GRFx Spectral flatness'        | 'GRFy Spectral spread'                 | 'GRFy RMS cD6'                                | 'GRFy Myopluse percentage rate'                  |
| 58 | 'GRFy Time to peak'             | 'GRFy Mean absolute value D8'          | 'GRFy Shape factor'                           | 'GRFx RMS cD2'                                   |
| 59 | 'GRFy Auto regressive 4'        | 'GRFy RMS'                             | 'GRFy Waveform length D4'                     | 'GRFy Mean absolute value cD3'                   |
| 60 | 'GRFy Spectral roll off point'  | 'GRFy Max Fractal length A8'           | 'GRFy Mean absolute value A6'                 | 'GRFx Max Fractal length D4'                     |
| 61 | 'GRFy Signal Kurtosis'          | 'GRFx Band power of D7'                | 'GRFx Max Fractal length A8'                  | 'GRFy Mean absolute value D3'                    |
| 62 | 'GRFy Signal to noise ratio'    | 'GRFx PS mean frequency'               | 'GRFy Difference absolute standard deviation' | 'GRFx Band power of D4'                          |
| 63 | 'GRFy Final/min'                | 'GRFy Third quantile'                  | 'GRFy Standard Deviation D4'                  | 'GRFy Waveform length D8'                        |
| 64 | 'GRFy Auto regressive 3'        | 'GRFy RMS cD4'                         | 'GRFx Sqrt of Variance'                       | 'GRFy RMS D7'                                    |
| 65 | 'GRFx Signal to noise ratio'    | 'GRFy Waveform length cD5'             | 'GRFy Mean absolute value D6'                 | 'GRFx Waveform length cD6'                       |
| 66 | 'GRFx Waveform length ratio'    | 'GRFx RMS D7'                          | 'GRFy Modified mean absolute value 1'         | 'GRFx Difference Between 0th & 4th order moment' |
| 67 | 'GRFx Signal skewness'          | 'GRFx Waveform length A6'              | 'GRFx Standard Deviation cD4'                 | 'GRFx Band power of cD1'                         |
| 68 | 'GRFy Slope sign change'        | 'GRFy Wavelet entropy level 4'         | 'GRFy Band power of D6'                       | 'GRFx Second peak'                               |
| 69 | 'GRFy Coefficient of variation' | 'GRFy Sqrt of Variance'                | 'GRFx Band power of D3'                       | 'GRFx Zero crossing'                             |
| 70 | 'GRFy Max to min drop of PS'    | 'GRFx Waveform length cD5'             | 'GRFx Estimate (signal entropy)'              | 'GRFx Descriptor SE NCELL'                       |
| 71 | 'GRFx Myopluse percentage rate' | 'GRFx Band power of cD8'               | 'GRFy RMS D1'                                 | 'GRFy Max Fractal length A6'                     |
| 72 | 'GRFy Peak'                     | 'GRFx Signal to motion artifact ratio' | 'GRFx Irregularity Factor'                    | 'GRFx Signal skewness'                           |
| 73 | 'GRFx Max Fractal length D1'    | 'GRFx Zero crossing'                   | 'GRFx Quantile range'                         | 'GRFy Waveform length cD5'                       |
| 74 | 'GRFx Auto regressive 1'        | 'GRFy Mean absolute value D5'          | 'GRFy Max Fractal length D5'                  | 'GRFx Max Fractal length D8'                     |

|     |                                  |                                                   |                                      |                                                   |
|-----|----------------------------------|---------------------------------------------------|--------------------------------------|---------------------------------------------------|
| 75  | ' GRFx Max/min ratio'            | ' GRFx Waveform length D5'                        | ' GRFy Band power of cD2'            | ' GRFx Descriptor SE Upper Bound'                 |
| 76  | ' GRFx Max to min drop of PS'    | ' GRFy Standard Deviation cD1'                    | ' GRFx Max Fractal length cD4'       | ' GRFx Powe spectral (PS) skewness'               |
| 77  | ' GRFx Final/min'                | ' GRFx Difference Between 0th & 4th order moment' | ' GRFx RMS D4'                       | ' GRFy Waveform length D5'                        |
| 78  | ' GRFx Median frequency'         | ' GRFx Sigma(signal entropy)'                     | ' GRFy Auto regressive 1'            | ' GRFx PS median frequency'                       |
| 79  | ' GRFy Auto regressive 1'        | ' GRFy RMS cD5'                                   | ' GRFy Auto regressive 2'            | ' GRFx RMS D2'                                    |
| 80  | ' GRFx Max value'                | ' GRFy Average power'                             | ' GRFy Spectral slope'               | ' GRFx First peak'                                |
| 81  | ' GRFx LOC of second peak'       | ' GRFx Standard Deviation A8'                     | ' GRFy Waveform length cD3'          | ' GRFy Standard Deviation D4'                     |
| 82  | ' GRFx Coefficient of variation' | ' GRFy Mean absolute value cD2'                   | ' GRFx Mean absolute value cD5'      | ' GRFy RMS cD8'                                   |
| 83  | ' GRFx Irregularity Factor'      | ' GRFx Band power of D5'                          | ' GRFy RMS D3'                       | ' GRFy Difference Between 0th & 4th order moment' |
| 84  | ' GRFx Band power of cD4'        | ' GRFy RMS cD7'                                   | ' GRFy Standard Deviation D6'        | ' GRFx Auto regressive 1'                         |
| 85  | ' GRFy Wavelet entropy level 6'  | ' GRFx Mean absolute value cA8'                   | ' GRFy Standard Deviation D2'        | ' GRFy Wavelet entropy level 6'                   |
| 86  | ' GRFy Mean'                     | ' GRFy Max Fractal length D8'                     | ' GRFx Max Fractal length cD5'       | ' GRFy Descriptor SE NCELL'                       |
| 87  | ' GRFy Auto regressive 2'        | ' GRFx Simple square integral'                    | ' GRFx Waveform length cD8'          | ' GRFy Max Fractal length cA8'                    |
| 88  | ' GRFx Max frequency'            | ' GRFx Mean absolute Value, D7'                   | ' GRFx Waveform length D4'           | ' GRFy RMS D5'                                    |
| 89  | ' GRFx PS kurtosis'              | ' GRFy Band power of D2'                          | ' GRFy Mean absolute value D4'       | ' GRFx Max Fractal length D2'                     |
| 90  | ' GRFy Max/min ratio'            | ' GRFy Variance'                                  | ' GRFx Enhanced mean Absolute Value' | ' GRFy RMS D6'                                    |
| 91  | ' GRFy Sparseness'               | ' GRFx Band power of cD4'                         | ' GRFy Spectral kurtosis'            | ' GRFy LOC of second peak'                        |
| 92  | ' GRFx Auto regressive 2'        | ' GRFx Spectral deformation'                      | ' GRFy Waveform length cA8'          | ' GRFy Zero order moment'                         |
| 93  | ' GRFy Zero crossing'            | ' GRFy Spectral skewness'                         | ' GRFy RMS cD1'                      | ' GRFx Max Fractal length A8'                     |
| 94  | ' GRFy Signal skewness'          | ' GRFy Standard Deviation A8'                     | ' GRFx Band power of cA8'            | ' GRFy Standard Deviation cA8'                    |
| 95  | ' GRFx Sparseness'               | ' GRFy First quantile'                            | ' GRFy Auto regressive 4'            | ' GRFy Zero crossing'                             |
| 96  | ' GRFy Irregularity Factor'      | ' GRFy RMS A8'                                    | ' GRFy Time to peak'                 | ' GRFx Band power of cD3'                         |
| 97  | ' GRFx Auto regressive 4'        | ' GRFy Spectral centroid'                         | ' GRFx Standard Deviation D6'        | ' GRFx Spectral decrease'                         |
| 98  | ' GRFx Spectral crest'           | ' GRFy Second peak'                               | ' GRFx Mean absolute value A8'       | ' GRFx Max value'                                 |
| 99  | ' GRFx Auto regressive 3'        | ' GRFx Sqrt of Variance'                          | ' GRFx RMS D8'                       | ' GRFx Band power of D2'                          |
| 100 | ' GRFx Sigma(signal entropy)'    | ' GRFy Band power of A8'                          |                                      | ' GRFx Zero order moment'                         |
| 101 | ' GRFy Waveform length ratio'    | ' GRFx Total Energy'                              |                                      | ' GRFx Mean absolute value cD7'                   |
| 102 | ' GRFy Spectral crest'           | ' GRFy Max Fractal length D6'                     |                                      |                                                   |

103 'GRFx Zero crossing' 'GRFx Mean absolute value  
cD4'

**Table S21.** Feature list from different Selection Techniques from GRFx-GRFz.

| Rank<br>ing | Chi Square                        | mrmr                                                   | relieff                                                | fscnca                                   |
|-------------|-----------------------------------|--------------------------------------------------------|--------------------------------------------------------|------------------------------------------|
| 1           | 'GRFz Max Fractal length<br>D3'   | 'GRFx RMS cD1'                                         | 'GRFz Spectral flatness'                               | 'GRFz Waveform length<br>cD1'            |
| 2           | 'GRFz Max/min ratio'              | 'GRFz RMS D6'                                          | 'GRFx Band power of cD5'                               | 'GRFz Band power of D5'                  |
| 3           | 'GRFz Third quantile'             | 'GRFz Waveform length<br>cD2'                          | 'GRFz Waveform length<br>D7'                           | 'GRFz Max Fractal length<br>cD8'         |
| 4           | 'GRFz Average power'              | 'GRFz Waveform length<br>cD7'                          | 'GRFx Spectral slope'                                  | 'GRFx Max Fractal length<br>cD4'         |
| 5           | 'GRFx Spectral crest'             | 'GRFx Band power of A8'                                | 'GRFx Descriptor SE Lower<br>Bound'                    | 'GRFz Standard<br>Deviation cD5'         |
| 6           | 'GRFx Waveform length<br>cD1'     | 'GRFz Waveform length<br>cD3'                          | 'GRFx Spectral roll off<br>point'                      | 'GRFz RMS cD1'                           |
| 7           | 'GRFz RMS cD8'                    | 'GRFz Spectral roll off<br>point'                      | 'GRFx PS median<br>frequency'                          | 'GRFx Peak to Peak'                      |
| 8           | 'GRFx Sqrt of Variance'           | 'GRFz Enhanced mean<br>Absolute Value'                 | 'GRFx Wavelet entropy<br>level 8'                      | 'GRFx Descriptor SE<br>NCELL'            |
| 9           | 'GRFx Max ratio'                  | 'GRFz Standard<br>Deviation cD3'                       | 'GRFx Spectral<br>deformation'                         | 'GRFx Mean absolute<br>value cD7'        |
| 10          | 'GRFz Waveform length<br>A8'      | 'GRFz Max Fractal length<br>cD4'                       | 'GRFz Difference<br>Between 0th & 2nd order<br>moment' | 'GRFx Mean absolute<br>value cD2'        |
| 11          | 'GRFz Spectral roll off<br>point' | 'GRFz tandard Deviation<br>D7'                         | 'GRFx Willison amplitude'                              | 'GRFz RMS cD6'                           |
| 12          | 'GRFx Waveform length<br>cD7'     | 'GRFz Band power of A8'                                | 'GRFz Spectral kurtosis'                               | 'GRFz PS median<br>frequency'            |
| 13          | 'GRFx Band power of cD6'          | 'GRFx Max Fractal length<br>cA8'                       | 'GRFx Mean absolute value'<br>cA8'                     | 'GRFz Max Fractal length<br>A8'          |
| 14          | 'GRFz First quantile'             | 'GRFz Standard<br>Deviation A6'                        | 'GRFz Auto regressive 2'                               | 'GRFx Sqrt of Variance'                  |
| 15          | 'GRFx Max value'                  | 'GRFz Waveform length<br>cD8'                          | 'GRFz Mean absolute<br>value cA8'                      | 'GRFx Time to peak'                      |
| 16          | 'GRFx Standard Deviation<br>cD7'  | 'GRFx Willison amplitude'                              | 'GRFz Max Fractal length<br>D8'                        | 'GRFz Waveform length<br>D6'             |
| 17          | 'GRFx Time to peak'               | 'GRFx RMS cD4'                                         | 'GRFz Max Fractal length<br>A8'                        | 'GRFx Sigma(signal<br>entropy)'          |
| 18          | 'GRFz Standard Deviation<br>D6'   | 'GRFx Max Fractal length<br>D7'                        | 'GRFx Spectral flatness'                               | 'GRFx Modified mean<br>absolute value 2' |
| 19          | 'GRFx Waveform length<br>ratio'   | 'GRFz Spectral crest'                                  | 'GRFz Estimate (signal<br>entropy)'                    | 'GRFz Mean absolute<br>value D8'         |
| 20          | 'GRFx Max Fractal length<br>D6'   | 'GRFz Waveform length<br>D8'                           | 'GRFx Spectral kurtosis'                               | 'GRFx Max Fractal length<br>cD1'         |
| 21          | 'GRFz Standard<br>Deviation A8'   | 'GRFz Difference<br>Between 0th & 2nd order<br>moment' | 'GRFz Auto regressive 1'                               | 'GRFz Band power of D3'                  |

|    |                                                         |                                                      |                                                      |                                                      |
|----|---------------------------------------------------------|------------------------------------------------------|------------------------------------------------------|------------------------------------------------------|
| 22 | ' GRFx Max Fractal length<br>cD6'                       | ' GRFx Standard Deviation<br>D2'                     | ' GRFx Signal to noise ratio '                       | ' GRFx Difference Between<br>0th & 4th order moment' |
| 23 | ' GRFx Standard Deviation<br>cD5'                       | ' GRFx Difference Between<br>0th & 2nd order moment' | ' GRFx Standard Deviation<br>D6'                     | ' GRFz RMS D2'                                       |
| 24 | ' GRFz Max Fractal length<br>cD2'                       | ' GRFx Max Fractal length<br>cD8'                    | ' GRFx Max to min drop of<br>PS'                     | ' GRFz Band power of<br>cA8'                         |
| 25 | ' GRFx PS median<br>frequency'                          | ' GRFx Sqrt of Variance'                             | ' GRFz Max Fractal length<br>D1'                     | ' GRFx Max value '                                   |
| 26 | ' GRFz RMS cD5'                                         | ' GRFz Total Energy'                                 | ' GRFx Auto regressive 4'                            | ' GRFz Zero order<br>moment'                         |
| 27 | ' GRFz Enhanced mean<br>Absolute Value'                 | ' GRFz Band power of<br>cA8'                         | ' GRFz Sqrt of Variance'                             | ' GRFx Enhanced Wave<br>form length'                 |
| 28 | ' GRFz Band power of D3'                                | ' GRFx Standard Deviation<br>A8'                     | ' GRFx Difference Between<br>0th & 4th order moment' | ' GRFx Difference Between<br>0th & 2nd order moment' |
| 29 | ' GRFx Standard Deviation<br>D2'                        | ' GRFz Time to peak'                                 | ' GRFx First quantile'                               | ' GRFx Max Fractal length<br>cD8'                    |
| 30 | ' GRFz Mean frequency '                                 | ' GRFz Mean absolute<br>value cD1'                   | ' GRFx Max Fractal length<br>D2'                     | ' GRFz Mean absolute<br>Value D7'                    |
| 31 | ' GRFz Spectral spread'                                 | ' GRFx Max/min ratio'                                | ' GRFx Signal skewness'                              | ' GRFx Powe spectral (PS)<br>skewness'               |
| 32 | ' GRFz Difference<br>Between 0th & 2nd order<br>moment' | ' GRFz Max value '                                   | ' GRFz Time to peak'                                 | ' GRFz Mean absolute<br>value D6'                    |
| 33 | ' GRFx Quantile range'                                  | ' GRFz Standard<br>Deviation D4'                     | ' GRFz Max Fractal length<br>cD8'                    | ' GRFx Average amplitude<br>change'                  |
| 34 | ' GRFx Max Fractal length<br>D1'                        | ' GRFx RMS cA8'                                      | ' GRFx Sigma(signal<br>entropy)'                     | ' GRFz Signal Kurtosis'                              |
| 35 | ' GRFz Median frequency<br>,                            | ' GRFx Waveform length<br>D5'                        | ' GRFx Max Fractal length<br>cD1'                    | ' GRFx Waveform length<br>D1'                        |
| 36 | ' GRFz Mean absolute<br>value D3'                       | ' GRFz Waveform length<br>cD4'                       | ' GRFx Max value '                                   | ' GRFx Max/min ratio'                                |
| 37 | ' GRFx RMS cD4'                                         | ' GRFx Mean absolute value<br>D6'                    | ' GRFx Mean absolute value<br>cD2'                   | ' GRFz PS kurtosis'                                  |
| 38 | ' GRFz Band power of D6'                                | ' GRFz Mean absolute<br>Value D7'                    | ' GRFx Max Fractal length<br>D3'                     | ' GRFx RMS D7'                                       |
| 39 | ' GRFz RMS D2'                                          | ' GRFx Signal to noise ratio '                       | ' GRFz Auto regressive 4'                            | ' GRFz RMS cD2'                                      |
| 40 | ' GRFz Spectral entropy'                                | ' GRFz Irregularity Factor'                          | ' GRFz PS kurtosis'                                  | ' GRFx Quantile range'                               |
| 41 | ' GRFz Peak'                                            | ' GRFz Band power of D7'                             | ' GRFx Shape factor'                                 | ' GRFx tandard Deviation<br>D7'                      |
| 42 | ' GRFz Mean absolute<br>value D5'                       | ' GRFx RMS D3'                                       | ' GRFx Mean absolute value<br>cD4'                   | ' GRFz RMS A8'                                       |
| 43 | ' GRFx Mean absolute value<br>cD5'                      | ' GRFx Signal skewness'                              | ' GRFz Final/min'                                    | ' GRFz RMS cD8'                                      |
| 44 | ' GRFx Mean absolute value<br>D5'                       | ' GRFx Waveform length<br>A6'                        | ' GRFz Spectral entropy'                             | ' GRFz Max Fractal length<br>D6'                     |
| 45 | ' GRFz Mean absolute<br>value D4'                       | ' GRFx Waveform length<br>cD7'                       | ' GRFx RMS D2'                                       | ' GRFx Band power of D2'                             |
| 46 | ' GRFx Mean absolute value<br>A8'                       | ' GRFz Median frequency<br>,                         | ' GRFz Band power of D8'                             | ' GRFx Max frequency'                                |

|    |                                       |                                  |                                 |                                |
|----|---------------------------------------|----------------------------------|---------------------------------|--------------------------------|
| 47 | 'GRFz Powe spectral (PS) skewness'    | 'GRFz Waveform length D3'        | 'GRFx Peak'                     | 'GRFx First peak '             |
| 48 | 'GRFx Standard Deviation cD4'         | 'GRFx Waveform length A8'        | 'GRFx Wavelet entropy level 6'  | 'GRFz Mean absolute value cD1' |
| 49 | 'GRFz Max Fractal length D7'          | 'GRFz Standard Deviation cD4'    | 'GRFz PS median frequency'      | 'GRFz Max Fractal length D7'   |
| 50 | 'GRFz Log detector'                   | 'GRFz Standard Deviation cD2'    | 'GRFz Band power of cD7'        | 'GRFz Band power of A8'        |
| 51 | 'GRFz Peak to Peak'                   | 'GRFx Estimate (signal entropy)' | 'GRFz Max/min ratio'            | 'GRFz Max Fractal length D8'   |
| 52 | 'GRFx RMS A8'                         | 'GRFz Peak'                      | 'GRFx First peak '              | 'GRFz Auto regressive 4'       |
| 53 | 'GRFz Mean absolute value D2'         | 'GRFz Variance'                  | 'GRFx Auto regressive 1'        | 'GRFz Time to peak'            |
| 54 | 'GRFz Standard Deviation cD5'         | 'GRFx Median frequency '         | 'GRFx Max/min ratio'            | 'GRFx Mean absolute value D2'  |
| 55 | 'GRFx Mean absolute value cD6'        | 'GRFx RMS D8'                    | 'GRFz PS mean frequency'        | 'GRFx Standard Deviation D4'   |
| 56 | 'GRFz Band power of cD2'              | 'GRFx PS kurtosis'               | 'GRFx Max ratio'                | 'GRFz Descriptor SE NCELL'     |
| 57 | 'GRFz RMS A8'                         | 'GRFx Band power of D5'          | 'GRFz Max Fractal length A6'    | 'GRFx Band power of A8'        |
| 58 | 'GRFz Standard Deviation D2'          | 'GRFx Standard Deviation cD6'    | 'GRFx Signal Kurtosis'          | 'GRFz Mean absolute value cD2' |
| 59 | 'GRFz Band power of cD1'              | 'GRFx Waveform length cD6'       | 'GRFx Auto regressive 3'        | 'GRFx RMS cD2'                 |
| 60 | 'GRFz Auto regressive 3'              | 'GRFz Mean absolute value cD3'   | 'GRFz First peak '              | 'GRFz RMS D7'                  |
| 61 | 'GRFz Maximum Fractal length'         | 'GRFx Third quantile'            | 'GRFx Sparseness'               | 'GRFx Max Fractal length D8'   |
| 62 | 'GRFx Mean absolute value D3'         | 'GRFx Mean absolute value cD1'   | 'GRFx Coefficient of variation' | 'GRFx Standard Deviation cD2'  |
| 63 | 'GRFx Mean absolute value cD7'        | 'GRFz Spectral skewness'         | 'GRFz Signal to noise ratio '   | 'GRFx Mean frequency '         |
| 64 | 'GRFz Descriptor SE Lower Bound'      | 'GRFz Waveform length cA8'       | 'GRFx Mean frequency '          | 'GRFz Standard Deviation cA8'  |
| 65 | 'GRFz Modified mean absolute value 2' | 'GRFz Band power of A6'          | 'GRFz Third quantile'           | 'GRFx Signal Kurtosis'         |
| 66 | 'GRFx Mean absolute value cD8'        | 'GRFx Max Fractal length cD2'    | 'GRFx Standard Deviation cD1'   | 'GRFx Variance'                |
| 67 | 'GRFx Band power of D3'               | 'GRFz Standard Deviation D5'     | 'GRFx Wavelet entropy level 4'  | 'GRFx Band power of D4'        |
| 68 | 'GRFx Variance'                       | 'GRFx Integrated absolute value' | 'GRFx Auto regressive 2'        | 'GRFz RMS cD3'                 |
| 69 | 'GRFz RMS D1'                         | 'GRFx Band power of cD1'         | 'GRFx Final/min'                | 'GRFz Max value '              |
| 70 | 'GRFx Enhanced Wave form length'      | 'GRFx Band power of cD4'         | 'GRFx Waveform length ratio'    | 'GRFx Waveform length D3'      |
| 71 | 'GRFx Standard Deviation cA8'         | 'GRFz Descriptor SE Upper Bound' | 'GRFz Sparseness'               | 'GRFx RMS cD3'                 |
| 72 | 'GRFx Descriptor SE NCELL'            | 'GRFz Spectral spread'           | 'GRFz Waveform length ratio'    | 'GRFx Mean absolute value D6'  |

|    |                                       |                                               |                                        |                                  |
|----|---------------------------------------|-----------------------------------------------|----------------------------------------|----------------------------------|
| 73 | 'GRFz Shape factor'                   | 'GRFx Wave form length'                       | 'GRFz Zero crossing'                   | 'GRFx Band power of cD6'         |
| 74 | 'GRFx Descriptor SE Upper Bound'      | 'GRFx Second peak'                            | 'GRFx Max Fractal length cD3'          | 'GRFz Waveform length cD8'       |
| 75 | 'GRFx Shape factor'                   | 'GRFz Difference absolute standard deviation' | 'GRFz Wavelet entropy level 8'         | 'GRFz Max to min drop of PS'     |
| 76 | 'GRFz Waveform length D2'             | 'GRFx Standard Deviation'                     | 'GRFz Irregularity Factor'             | 'GRFx PS median frequency'       |
| 77 | 'GRFz Modified mean absolute value 1' | 'GRFx Maximum Fractal length'                 | 'GRFx Max Fractal length cD4'          | 'GRFz RMS D5'                    |
| 78 | 'GRFx Sigma(signal entropy)'          | 'GRFz Spectral entropy'                       | 'GRFx PS kurtosis'                     | 'GRFx Mean absolute value D5'    |
| 79 | 'GRFx Spectral decrease'              | 'GRFx Spectral slope'                         | 'GRFx Signal to motion artifact ratio' | 'GRFx RMS D5'                    |
| 80 | 'GRFx Waveform length D1'             | 'GRFx Descriptor SE Lower Bound'              | 'GRFx Second peak'                     | 'GRFz Descriptor SE Lower Bound' |
| 81 | 'GRFx RMS'                            | 'GRFz Mean absolute value A6'                 | 'GRFx Myopluse percentage rate'        | 'GRFx Max Fractal length cD5'    |
| 82 | 'GRFx Spectral deformation'           | 'GRFz Mean frequency'                         | 'GRFx Zero crossing'                   | 'GRFz Peak to Peak'              |
| 83 | 'GRFx RMS A6'                         | 'GRFz Wavelet entropy level 4'                | 'GRFx Irregularity Factor'             | 'GRFz Max Fractal length cD5'    |
| 84 | 'GRFx Waveform length cA8'            | 'GRFx Max Fractal length cD3'                 | 'GRFx Spectral crest'                  | 'GRFz Log detector'              |
| 85 | 'GRFx Mean absolute value D6'         | 'GRFx Wavelet entropy level 4'                | 'GRFz Signal Kurtosis'                 | 'GRFx Band power of cD3'         |
| 86 | 'GRFx Waveform length A8'             | 'GRFx Slope sign change'                      | 'GRFx Max frequency'                   | 'GRFx Waveform length D4'        |
| 87 | 'GRFz Spectral deformation'           | 'GRFx Myopluse percentage rate'               |                                        | 'GRFz Waveform length D8'        |
| 88 | 'GRFx RMS cA8'                        | 'GRFz Mean absolute value D3'                 |                                        | 'GRFx RMS cA8'                   |
| 89 | 'GRFx Standard Deviation'             | 'GRFx Waveform length D7'                     |                                        | 'GRFz Standard Deviation cD7'    |
| 90 | 'GRFz Band power of D5'               | 'GRFx Log detector'                           |                                        | 'GRFz RMS A6'                    |
| 91 | 'GRFx Band power of D5'               | 'GRFx Band power of D8'                       |                                        | 'GRFz Sparseness'                |
| 92 |                                       | 'GRFx Coefficient of variation'               |                                        | 'GRFz Max Fractal length cD6'    |
| 93 |                                       | 'GRFx Band power of cD2'                      |                                        | 'GRFz Wavelet entropy level 8'   |
| 94 |                                       | 'GRFx Modified mean absolute value 2'         |                                        |                                  |

Table S22. Feature list from different Selection Techniques from GRFy-GRFz.

| Ranking | Chi Square                 | mrmr                             | relieff              | fscnca                        |
|---------|----------------------------|----------------------------------|----------------------|-------------------------------|
| 1       | 'GRFy Spectral skewness'   | 'GRFy Descriptor SE Upper Bound' | 'GRFz Spectral flux' | 'GRFy Waveform length D5'     |
| 2       | 'GRFy Irregularity Factor' | 'GRFy Max Fractal length D5'     | 'GRFz RMS cD3'       | 'GRFz Mean absolute value A8' |

|    |                                  |                                  |                                  |                                  |
|----|----------------------------------|----------------------------------|----------------------------------|----------------------------------|
| 3  | 'GRFy Spectral centroid'         | 'GRFy Max Fractal length cD5'    | 'GRFy RMS cD5'                   | 'GRFz Enhanced Wave form length' |
| 4  | 'GRFz Max Fractal length cD3'    | 'GRFy Waveform length cD5'       | 'GRFy Waveform length cD3'       | 'GRFz Waveform length cD4'       |
| 5  | 'GRFz Waveform length A6'        | 'GRFz Waveform length D7'        | 'GRFy Waveform length D3'        | 'GRFz RMS cD8'                   |
| 6  | 'GRFz Max frequency'             | 'GRFz Max value '                | 'GRFz Descriptor SE Upper Bound' | 'GRFy Band power of D7'          |
| 7  | 'GRFy Coefficient of variation'  | 'GRFz Band power of cD1'         | 'GRFy Wave form length'          | 'GRFz Spectral crest'            |
| 8  | 'GRFy Max ratio'                 | 'GRFz Standard Deviation cD1'    | 'GRFy PS median frequency'       | 'GRFz Median frequency '         |
| 9  | 'GRFz Waveform length D4'        | 'GRFz Coefficient of variation'  | 'GRFy RMS'                       | 'GRFy Waveform length ratio'     |
| 10 | 'GRFz Waveform length cD3'       | 'GRFz Wave form length'          | 'GRFy Standard Deviation cD2'    | 'GRFz Max Fractal length D6'     |
| 11 | 'GRFz Standard Deviation cD7'    | 'GRFz Max Fractal length cD3'    | 'GRFz Mean absolute Value D7'    | 'GRFy RMS cA8'                   |
| 12 | 'GRFy Mean absolute value D6'    | 'GRFy Zero crossing'             | 'GRFz tandard Deviation D7'      | 'GRFz First peak '               |
| 13 | 'GRFy Signal Kurtosis'           | 'GRFz Mean absolute value A6'    | 'GRFz Wavelet entropy level 6'   | 'GRFy Waveform length D4'        |
| 14 | 'GRFz Band power of D4'          | 'GRFz Standard Deviation D1'     | 'GRFy RMS D2'                    | 'GRFz Willison amplitude'        |
| 15 | 'GRFz Mean absolute value A6'    | 'GRFz Descriptor SE Upper Bound' | 'GRFz Standard Deviation D4'     | 'GRFz Band power of cD5'         |
| 16 | 'GRFz RMS cA8'                   | 'GRFz Mean absolute Value'       | 'GRFz Max Fractal length cD4'    | 'GRFy PS median frequency'       |
| 17 | 'GRFz Wavelet entropy level 6'   | 'GRFz Mean absolute value A8'    | 'GRFy Mean absolute value D8'    | 'GRFy Signal to noise ratio '    |
| 18 | 'GRFz Final/min'                 | 'GRFy Standard Deviation D2'     | 'GRFz Zero crossing'             | 'GRFz Waveform length cD8'       |
| 19 | 'GRFz Band power of D2'          | 'GRFy Band power of D1'          | 'GRFy Median frequency '         | 'GRFz RMS cD1'                   |
| 20 | 'GRFz Coefficient of variation'  | 'GRFz Mean absolute value D4'    | 'GRFy Standard Deviation D2'     | 'GRFz Zero crossing'             |
| 21 | 'GRFz Standard Deviation A6'     | 'GRFz Max Fractal length D1'     | 'GRFz Mean absolute value D2'    | 'GRFy Max frequency'             |
| 22 | 'GRFz Descriptor SE Upper Bound' | 'GRFz Standard Deviation A6'     | 'GRFy Band power of cA8'         | 'GRFz Spectral deformation '     |
| 23 | 'GRFy RMS cD8'                   | 'GRFz Average power'             | 'GRFz Waveform length cD8'       | 'GRFz Max value '                |
| 24 | 'GRFy Mean absolute value D4'    | 'GRFy Standard Deviation D5'     | 'GRFy PS mean frequency'         | 'GRFz RMS D1'                    |
| 25 | 'GRFz Mean absolute value cA8'   | 'GRFz RMS cA8'                   | 'GRFy Auto regressive 4'         | 'GRFy Mean absolute value cD8'   |
| 26 | 'GRFy Log detector'              | 'GRFz RMS A8'                    | 'GRFy Mean absolute value cD6'   | 'GRFy Enhanced Wave form length' |
| 27 | 'GRFy Sigma(signal entropy)'     | 'GRFz Band power of D6'          | 'GRFz Max Fractal length D6'     | 'GRFz RMS cD6'                   |

|    |                                     |                                                  |                                                  |                                       |
|----|-------------------------------------|--------------------------------------------------|--------------------------------------------------|---------------------------------------|
| 28 | 'GRFy RMS D8'                       | 'GRFy Spectral crest'                            | 'GRFy Mean absolute value cA8'                   | 'GRFy Mean absolute Value'            |
| 29 | 'GRFy Waveform length A6'           | 'GRFy Mean absolute value cD8'                   | 'GRFy Difference Between 0th & 2nd order moment' | 'GRFz Max frequency'                  |
| 30 | 'GRFz Mean absolute Value D7'       | 'GRFz RMS cD6'                                   | 'GRFz Band power of A8'                          | 'GRFy Standard Deviation cD8'         |
| 31 | 'GRFz Mean absolute value cD3'      | 'GRFz Standard Deviation'                        | 'GRFz Band power of cD2'                         | 'GRFz Max Fractal length D1'          |
| 32 | 'GRFy Band power of A6'             | 'GRFy RMS cD7'                                   | 'GRFz Mean'                                      | 'GRFz RMS D2'                         |
| 33 | 'GRFz RMS cD2'                      | 'GRFy Standard Deviation D8'                     | 'GRFy Band power of A6'                          | 'GRFy Band power of cD7'              |
| 34 | 'GRFz Spectral flatness'            | 'GRFz RMS D4'                                    | 'GRFz Peak'                                      | 'GRFy Zero order moment'              |
| 35 | 'GRFy Waveform length D5'           | 'GRFy Sqrt of Variance'                          | 'GRFz Waveform length cD4'                       | 'GRFz Mean absolute value D8'         |
| 36 | 'GRFy Band power of D8'             | 'GRFy Waveform length cD3'                       | 'GRFy First quantile'                            | 'GRFy RMS cD8'                        |
| 37 | 'GRFy Spectral decrease'            | 'GRFz Max Fractal length A6'                     | 'GRFy RMS cD2'                                   | 'GRFy Auto regressive 4'              |
| 38 | 'GRFz Waveform length A8'           | 'GRFy Mean absolute value cD1'                   | 'GRFy Waveform length ratio'                     | 'GRFy Sigma(signal entropy)'          |
| 39 | 'GRFy Max value'                    | 'GRFz Standard Deviation D4'                     | 'GRFy Max Fractal length cD4'                    | 'GRFz Mean absolute value cD4'        |
| 40 | 'GRFy Mean absolute value D1'       | 'GRFz Sigma(signal entropy)'                     | 'GRFz Waveform length cD3'                       | 'GRFy Max Fractal length D3'          |
| 41 | 'GRFz Enhanced Wave form length'    | 'GRFy Modified mean absolute value 1'            | 'GRFz RMS cD2'                                   | 'GRFz Spectral decrease'              |
| 42 | 'GRFz Waveform length D2'           | 'GRFy Mean absolute value D5'                    | 'GRFz Max Fractal length cD5'                    | 'GRFy Spectral slope'                 |
| 43 | 'GRFz Standard Deviation D5'        | 'GRFy Max Fractal length D7'                     | 'GRFy Slope sign change'                         | 'GRFy Band power of cD3'              |
| 44 | 'GRFz Quantile range'               | 'GRFy Modified mean absolute value 2'            | 'GRFz Mean absolute value D3'                    | 'GRFz Auto regressive 3'              |
| 45 | 'GRFy Signal to noise ratio'        | 'GRFz Waveform length D6'                        | 'GRFy Band power of D4'                          | 'GRFy LOC of first peak'              |
| 46 | 'GRFz Band power of cD8'            | 'GRFy Irregularity Factor'                       | 'GRFy Final/min'                                 | 'GRFz RMS A8'                         |
| 47 | 'GRFz Band power of D1'             | 'GRFz Difference Between 0th & 2nd order moment' | 'GRFz Mean frequency'                            | 'GRFz Band power of D8'               |
| 48 | 'GRFy Standard Deviation A8'        | 'GRFz Mean'                                      | 'GRFy Sigma(signal entropy)'                     | 'GRFy Standard Deviation cD1'         |
| 49 | 'GRFz Enhanced mean Absolute Value' | 'GRFz Max Fractal length cD1'                    | 'GRFz Band power of cD7'                         | 'GRFy Max Fractal length D7'          |
| 50 | 'GRFy Standard Deviation cD7'       | 'GRFz RMS cD8'                                   | 'GRFz Wavelet entropy level 8'                   | 'GRFy Integrated absolute value'      |
| 51 | 'GRFy Waveform length D6'           | 'GRFy Signal Kurtosis'                           | 'GRFy LOC of first peak'                         | 'GRFy Band power of cD1'              |
| 52 | 'GRFy Willison amplitude'           | 'GRFz Max Fractal length D4'                     | 'GRFy Powe spectral (PS) skewness'               | 'GRFz Modified mean absolute value 2' |



|    |                                                  |                                  |                                               |                                                  |
|----|--------------------------------------------------|----------------------------------|-----------------------------------------------|--------------------------------------------------|
| 53 | 'GRFy Max Fractal length D8'                     | 'GRFy Variance'                  | 'GRFz Spectral roll off point'                | 'GRFz Signal Kurtosis'                           |
| 54 | 'GRFy Mean frequency'                            | 'GRFy Band power of D4'          | 'GRFz Descriptor SE Lower Bound'              | 'GRFy Mean'                                      |
| 55 | 'GRFy Final/min'                                 | 'GRFy Spectral centroid'         | 'GRFy Modified mean absolute value 1'         | 'GRFy Waveform length cD6'                       |
| 56 | 'GRFy Max to min drop of PS'                     | 'GRFy Wavelet entropy level 8'   | 'GRFy Average power'                          | 'GRFz Wavelet entropy level 4'                   |
| 57 | 'GRFy Difference absolute standard deviation'    | 'GRFy Band power of cD8'         | 'GRFz Total Energy'                           | 'GRFz Max Fractal length D8'                     |
| 58 | 'GRFz Max Fractal length cD2'                    | 'GRFz Spectral spread'           | 'GRFy Sparseness'                             | 'GRFy Estimate (signal entropy)'                 |
| 59 | 'GRFy Standard Deviation cD2'                    | 'GRFz Mean absolute Value D7'    | 'GRFy Max Fractal length cD8'                 | 'GRFy RMS cD7'                                   |
| 60 | 'GRFz Signal Kurtosis'                           | 'GRFy Estimate (signal entropy)' | 'GRFy Mean absolute value A6'                 | 'GRFz Standard Deviation D2'                     |
| 61 | 'GRFz Max Fractal length cD5'                    | 'GRFy Average power'             | 'GRFy Max Fractal length D5'                  | 'GRFz Mean absolute value cA8'                   |
| 62 | 'GRFz Waveform length cD7'                       | 'GRFy Max Fractal length D4'     | 'GRFz Time to peak'                           | 'GRFy Waveform length A6'                        |
| 63 | 'GRFz Band power of cD7'                         | 'GRFy LOC of second peak'        | 'GRFz Slope sign change'                      | 'GRFz Difference Between 0th & 4th order moment' |
| 64 | 'GRFz Difference Between 0th & 4th order moment' | 'GRFy RMS A8'                    | 'GRFz PS mean frequency'                      | 'GRFz Max Fractal length cD6'                    |
| 65 | 'GRFy Total Energy'                              | 'GRFz Spectral flux'             | 'GRFz Auto regressive 1'                      | 'GRFy Maximum Fractal length'                    |
| 66 | 'GRFy Waveform length cA8'                       | 'GRFz Peak to Peak'              | 'GRFz Max Fractal length cD8'                 | 'GRFz RMS cA8'                                   |
| 67 | 'GRFy Band power of D5'                          | 'GRFy Auto regressive 3'         | 'GRFy Descriptor SE NCELL'                    | 'GRFz Waveform length D4'                        |
| 68 | 'GRFy Standard Deviation cA8'                    | 'GRFz Waveform length cD5'       | 'GRFz Signal to motion artifact ratio'        | 'GRFz Standard Deviation cA8'                    |
| 69 | 'GRFz Standard Deviation cA8'                    | 'GRFy Mean absolute value D4'    | 'GRFz First quantile'                         | 'GRFy Band power of D1'                          |
| 70 | 'GRFz Mean'                                      | 'GRFz Total Energy'              | 'GRFz Signal to noise ratio'                  | 'GRFy Max Fractal length A6'                     |
| 71 | 'GRFy RMS cD3'                                   | 'GRFz Waveform length D1'        | 'GRFz Median frequency'                       | 'GRFy Mean absolute Value D7'                    |
| 72 | 'GRFy Auto regressive 1'                         | 'GRFz Spectral centroid'         | 'GRFy Quantile range'                         | 'GRFz Descriptor SE Lower Bound'                 |
| 73 | 'GRFy PS median frequency'                       | 'GRFz Waveform length cA8'       | 'GRFz Average power'                          | 'GRFy Max Fractal length cD2'                    |
| 74 | 'GRFz Standard Deviation A8'                     | 'GRFy Waveform length D2'        | 'GRFz Difference absolute standard deviation' | 'GRFy Standard Deviation D5'                     |
| 75 | 'GRFz Sigma(signal entropy)'                     | 'GRFy RMS cD8'                   | 'GRFy Wavelet entropy level 8'                | 'GRFz Waveform length cD2'                       |

|    |                              |                                |                               |                                  |
|----|------------------------------|--------------------------------|-------------------------------|----------------------------------|
| 76 | 'GRFz Waveform length cA8'   | 'GRFz Wavelet entropy level 8' | 'GRFy Log detector'           | 'GRFy Standard Deviation A8'     |
| 77 | 'GRFz Standard Deviation D1' | 'GRFy Sparseness'              | 'GRFy Willison amplitude'     | 'GRFy Mean absolute value D8'    |
| 78 | 'GRFy Spectral flux'         | 'GRFz Mean absolute value cD3' | 'GRFy Waveform length A6'     | 'GRFz Auto regressive 4'         |
| 79 | 'GRFy Waveform length cD2'   | 'GRFz Standard Deviation cD3'  | 'GRFz Max Fractal length cD3' | 'GRFz RMS D3'                    |
| 80 | 'GRFz Max Fractal length D4' | 'GRFy Band power of D3'        | 'GRFy Max Fractal length D3'  | 'GRFz Band power of D6'          |
| 81 |                              | 'GRFy RMS D6'                  |                               | 'GRFz Spectral kurtosis'         |
| 82 |                              | 'GRFz Max Fractal length D7'   |                               | 'GRFz Estimate (signal entropy)' |
| 83 |                              | 'GRFz Zero order moment'       |                               | 'GRFz Waveform length D7'        |
| 84 |                              | 'GRFz Sparseness'              |                               | 'GRFz Max Fractal length A8'     |
| 85 |                              | 'GRFy Third quantile'          |                               | 'GRFz Auto regressive 2'         |
|    |                              | 'GRFy Mean absolute Value'     |                               | 'GRFy Waveform length D1'        |

Table S23. Feature list from different Selection Techniques from GRFx-GRFy-GRFz.

| Rank ing | Chi Square                     | mrmr                            | relieff                                          | fscnca                         |
|----------|--------------------------------|---------------------------------|--------------------------------------------------|--------------------------------|
| 1        | 'GRFx Signal Kurtosis'         | 'GRFy PS median frequency'      | 'GRFz Spectral flatness'                         | 'GRFz Max Fractal length D6'   |
| 2        | 'GRFz Waveform length D4'      | 'GRFz Band power of A6'         | 'GRFy Max frequency'                             | 'GRFy Median frequency'        |
| 3        | 'GRFz Max Fractal length cD8'  | 'GRFx Waveform length cD7'      | 'GRFx Simple square integral'                    | 'GRFx Max Fractal length cA8'  |
| 4        | 'GRFx Willison amplitude'      | 'GRFx Mean absolute value D8'   | 'GRFx Spectral slope'                            | 'GRFy Standard Deviation cD4'  |
| 5        | 'GRFy Irregularity Factor'     | 'GRFy Mean absolute value cD3'  | 'GRFz Waveform length D7'                        | 'GRFy Zero order moment'       |
| 6        | 'GRFy Waveform length cD7'     | 'GRFx Mean absolute value D4'   | 'GRFx Spectral roll off point'                   | 'GRFz Standard Deviation cD2'  |
| 7        | 'GRFz Mean'                    | 'GRFx Waveform length D6'       | 'GRFx Descriptor SE Lower Bound'                 | 'GRFx Spectral spread'         |
| 8        | 'GRFz Max Fractal length A6'   | 'GRFz Coefficient of variation' | 'GRFx PS median frequency'                       | 'GRFy Standard Deviation cD6'  |
| 9        | 'GRFx Sqrt of Variance'        | 'GRFx Standard Deviation cD3'   | 'GRFx Wavelet entropy level 8'                   | 'GRFy Wavelet entropy level 6' |
| 10       | 'GRFz Waveform length ratio'   | 'GRFz Peak'                     | 'GRFz Spectral kurtosis'                         | 'GRFx Spectral entropy'        |
| 11       | 'GRFx Band power of cD3'       | 'GRFy Max Fractal length cD8'   | 'GRFx Spectral deformation'                      | 'GRFx Max/min ratio'           |
| 12       | 'GRFz RMS cD4'                 | 'GRFx Sqrt of Variance'         | 'GRFx Mean absolute value cA8'                   | 'GRFx Time to peak'            |
| 13       | 'GRFz Mean absolute value cD4' | 'GRFy Standard Deviation'       | 'GRFz Difference Between 0th & 2nd order moment' | 'GRFy Peak'                    |

|    |                                  |                                               |                                                  |                                                  |
|----|----------------------------------|-----------------------------------------------|--------------------------------------------------|--------------------------------------------------|
| 14 | 'GRFz Max Fractal length D8'     | 'GRFx First quantile'                         | 'GRFy Spectral kurtosis'                         | 'GRFz RMS D7'                                    |
| 15 | 'GRFy Spectral flux'             | 'GRFx Final/min'                              | 'GRFx Willison amplitude'                        | 'GRFx Band power of cA8'                         |
| 16 | 'GRFx Sparseness'                | 'GRFy Waveform length D2'                     | 'GRFz Max Fractal length D8'                     | 'GRFx Simple square integral'                    |
| 17 | 'GRFx Band power of D7'          | 'GRFx Mean absolute value cD8'                | 'GRFz Mean absolute value cA8'                   | 'GRFz Standard Deviation D8'                     |
| 18 | 'GRFz Log detector'              | 'GRFz Spectral crest'                         | 'GRFx Spectral kurtosis'                         | 'GRFz Descriptor SE NCELL'                       |
| 19 | 'GRFz Standard Deviation cA8'    | 'GRFx Mean absolute value cD5'                | 'GRFz Max Fractal length A8'                     | 'GRFy Waveform length ratio'                     |
| 20 | 'GRFx Waveform length ratio'     | 'GRFz Spectral entropy'                       | 'GRFx Spectral flatness'                         | 'GRFz Difference absolute standard deviation'    |
| 21 | 'GRFz Waveform length D8'        | 'GRFx Waveform length A6'                     | 'GRFz Auto regressive 2'                         | 'GRFx Band power of cD7'                         |
| 22 | 'GRFy Sqrt of Variance'          | 'GRFz Max Fractal length cD7'                 | 'GRFz Estimate (signal entropy)'                 | 'GRFy Signal to motion artifact ratio'           |
| 23 | 'GRFz PS kurtosis'               | 'GRFx Difference absolute standard deviation' | 'GRFy Spectral centroid'                         | 'GRFy Irregularity Factor'                       |
| 24 | 'GRFy Final/min'                 | 'GRFy Band power of A8'                       | 'GRFy Peak'                                      | 'GRFz Mean absolute value cD4'                   |
| 25 | 'GRFz Band power of cD4'         | 'GRFy Mean absolute value D4'                 | 'GRFy Spectral deformation'                      | 'GRFy Max Fractal length A8'                     |
| 26 | 'GRFz Band power of cD2'         | 'GRFz First quantile'                         | 'GRFx Max to min drop of PS'                     | 'GRFx Waveform length D1'                        |
| 27 | 'GRFx RMS cA8'                   | 'GRFz Standard Deviation A8'                  | 'GRFx Signal to noise ratio'                     | 'GRFy Band power of cA8'                         |
| 28 | 'GRFx Mean absolute Value D7'    | 'GRFx Max Fractal length D2'                  | 'GRFy Mean absolute value cD7'                   | 'GRFz Standard Deviation D1'                     |
| 29 | 'GRFx Enhanced Wave form length' | 'GRFx Mean absolute value cA8'                | 'GRFy Wavelet entropy level 8'                   | 'GRFx Max Fractal length cD2'                    |
| 30 | 'GRFz Integrated absolute value' | 'GRFz Wavelet entropy level 6'                | 'GRFx First quantile'                            | 'GRFy Descriptor SE NCELL'                       |
| 31 | 'GRFx Time to peak'              | 'GRFx Max Fractal length D4'                  | 'GRFz Auto regressive 1'                         | 'GRFy Auto regressive 1'                         |
| 32 | 'GRFx Max ratio'                 | 'GRFx Spectral flatness'                      | 'GRFx Standard Deviation D6'                     | 'GRFz Waveform length D7'                        |
| 33 | 'GRFx Mean absolute value cD3'   | 'GRFx Peak'                                   | 'GRFy Second peak'                               | 'GRFx Sparseness'                                |
| 34 | 'GRFz Band power of cD6'         | 'GRFx Max Fractal length cD7'                 | 'GRFy Max/min ratio'                             | 'GRFx Standard Deviation D6'                     |
| 35 | 'GRFy Auto regressive 3'         | 'GRFx Maximum Fractal length'                 | 'GRFy Signal skewness'                           | 'GRFy Auto regressive 2'                         |
| 36 | 'GRFx Standard Deviation D1'     | 'GRFx Mean absolute value cD6'                | 'GRFz Sqrt of Variance'                          | 'GRFz Mean absolute value D4'                    |
| 37 | 'GRFx First peak'                | 'GRFx Band power of D8'                       | 'GRFy Mean frequency'                            | 'GRFx Difference Between 0th & 2nd order moment' |
| 38 | 'GRFy Spectral decrease'         | 'GRFz Waveform length cD4'                    | 'GRFx Difference Between 0th & 4th order moment' | 'GRFx Max Fractal length D6'                     |

|    |                                                 |                                   |                                   |                                        |
|----|-------------------------------------------------|-----------------------------------|-----------------------------------|----------------------------------------|
| 39 | ' GRFy Sparseness'                              | ' GRFy Band power of cD1'         | ' GRFy LOC of first peak'         | ' GRFy Max/min ratio'                  |
| 40 | ' GRFy RMS'                                     | ' GRFx Waveform length cD3'       | ' GRFx Signal skewness'           | ' GRFy Average amplitude change'       |
| 41 | ' GRFx Mean absolute value cD2'                 | ' GRFy Spectral slope'            | ' GRFz Max Fractal length D1'     | ' GRFy Waveform length cD1'            |
| 42 | ' GRFx Spectral entropy'                        | ' GRFx RMS D8'                    | ' GRFz Time to peak'              | ' GRFx Zero crossing'                  |
| 43 | ' GRFz Modified mean absolute value 2'          | ' GRFy Spectral flatness'         | ' GRFx Max Fractal length D2'     | ' GRFx Standard Deviation D2'          |
| 44 | ' GRFy Waveform length cD3'                     | ' GRFy Estimate (signal entropy)' | ' GRFx Sigma(signal entropy)'     | ' GRFz Peak to Peak'                   |
| 45 | ' GRFy Auto regressive 1'                       | ' GRFy Band power of cA8'         | ' GRFy Descriptor SE Lower Bound' | ' GRFz RMS D6'                         |
| 46 | ' GRFz Coefficient of variation'                | ' GRFz Max Fractal length A8'     | ' GRFx Mean absolute value cD2'   | ' GRFx RMS cD5'                        |
| 47 | ' GRFz Wavelet entropy level 6'                 | ' GRFz Signal skewness'           | ' GRFz PS kurtosis'               | ' GRFy Mean absolute value D6'         |
| 48 | ' GRFz Signal to noise ratio '                  | ' GRFy Max Fractal length D1'     | ' GRFy Shape factor'              | ' GRFy RMS cD6'                        |
| 49 | ' GRFx RMS D3'                                  | ' GRFx Descriptor SE NCELL'       | ' GRFz Max Fractal length cD8'    | ' GRFy Enhanced Wave form length'      |
| 50 | ' GRFy Second peak'                             | ' GRFz Band power of D5'          | ' GRFx Auto regressive 4'         | ' GRFx Shape factor'                   |
| 51 | ' GRFx Max Fractal length D2'                   | ' GRFz Standard Deviation D3'     | ' GRFx Mean absolute value D3'    | ' GRFz Mean absolute value D2'         |
| 52 | ' GRFy Mean absolute value cD2'                 | ' GRFz RMS cD7'                   | ' GRFx Shape factor'              | ' GRFz Max Fractal length cD4'         |
| 53 | ' GRFy Max Fractal length D7'                   | ' GRFy Band power of cD8'         | ' GRFx Max value '                | ' GRFx Mean absolute value cD5'        |
| 54 | ' GRFx Maximum Fractal length'                  | ' GRFx RMS D3'                    | ' GRFy Max to min drop of PS'     | ' GRFx Max Fractal length D4'          |
| 55 | ' GRFx Auto regressive 2'                       | ' GRFx RMS cD7'                   | ' GRFx Max Fractal length cD1'    | ' GRFx Willison amplitude'             |
| 56 | ' GRFz Spectral entropy'                        | ' GRFy Max Fractal length D7'     | ' GRFx RMS D2'                    | ' GRFy Band power of A6'               |
| 57 | ' GRFx Difference absolute standard deviation ' | ' GRFz RMS cD6'                   | ' GRFx Mean absolute value cD4'   | ' GRFz Band power of D1'               |
| 58 | ' GRFy Max Fractal length cD4'                  | ' GRFz Mean absolute Value D7'    | ' GRFx Wavelet entropy level 6'   | ' GRFx Max Fractal length cD5'         |
| 59 | ' GRFx Mean absolute value cD5'                 | ' GRFx Spectral deformation '     | ' GRFz Final/min'                 | ' GRFx Average power'                  |
| 60 | ' GRFx Mean absolute value A8'                  | ' GRFy Spectral crest'            | ' GRFz PS median frequency'       | ' GRFy Mean absolute value cD8'        |
| 61 | ' GRFx Waveform length cD2'                     | ' GRFz Sqrt of Variance'          | ' GRFz Auto regressive 4'         | ' GRFy RMS D5'                         |
| 62 | ' GRFx RMS D5'                                  | ' GRFz Band power of cD8'         | ' GRFx Peak'                      | ' GRFx Modified mean absolute value 1' |
| 63 | ' GRFx Waveform length A6'                      | ' GRFz Average power'             | ' GRFz Standard Deviation cD7'    | ' GRFx Max Fractal length A8'          |

|    |                                                   |                                   |                                         |                                                   |
|----|---------------------------------------------------|-----------------------------------|-----------------------------------------|---------------------------------------------------|
| 64 | ' GRFx Quantile range'                            | ' GRFx RMS D5'                    | ' GRFy Signal to motion artifact ratio' | ' GRFz Max Fractal length cD7'                    |
| 65 | ' GRFy Spectral flatness'                         | ' GRFx Spectral roll off point '  | ' GRFz Band power of D8'                | 'GRFy Enhanced mean Absolute Value'               |
| 66 | ' GRFx Difference Between 0th & 4th order moment' | ' GRFz Wavelet entropy level 8'   | ' GRFz Spectral entropy'                | ' GRFx Mean absolute value cA8'                   |
| 67 | ' GRFz Descriptor SE NCELL'                       | ' GRFz Band power of D1'          | ' GRFz First peak '                     | ' GRFx Modified mean absolute value 2'            |
| 68 | ' GRFy Max Fractal length cD7'                    | ' GRFy Max Fractal length cD1'    | ' GRFx Max ratio'                       | ' GRFy RMS D6'                                    |
| 69 | ' GRFy Mean absolute value cD7'                   | ' GRFy Waveform length cD8'       | ' GRFy Coefficient of variation'        | ' GRFx Maximum Fractal length'                    |
| 70 | ' GRFy Mean absolute value cD8'                   | ' GRFy Signal Kurtosis'           | ' GRFy Slope sign change'               | ' GRFx Max value '                                |
| 71 | ' GRFy Auto regressive 4'                         | ' GRFx Waveform length cD1'       | ' GRFx First peak '                     | ' GRFz Spectral kurtosis'                         |
| 72 | ' GRFy Waveform length cD1'                       | ' GRFy Descriptor SE Lower Bound' | ' GRFy Time to peak'                    | ' GRFy Band power of cD3'                         |
| 73 | ' GRFz Mean absolute value cD5'                   | ' GRFy Peak to Peak'              | ' GRFx Max/min ratio'                   | ' GRFy RMS A8'                                    |
| 74 | ' GRFy Slope sign change'                         | ' GRFx Max Fractal length D1'     | ' GRFy Max Fractal length D3'           | ' GRFz Max Fractal length cD1'                    |
| 75 | ' GRFy Wavelet entropy level 6'                   | ' GRFx Mean absolute value cD2'   | ' GRFy Auto regressive 2'               | ' GRFy Waveform length D6'                        |
| 76 | ' GRFy Standard Deviation A6'                     | ' GRFz Waveform length ratio'     | ' GRFx Signal Kurtosis'                 | ' GRFz RMS A6'                                    |
| 77 | ' GRFx Band power of D6'                          | ' GRFy Max Fractal length D5'     | ' GRFx Coefficient of variation'        | ' GRFz PS kurtosis'                               |
| 78 | ' GRFx Spectral crest'                            | ' GRFx Band power of cD5'         | ' GRFx Standard Deviation cD1'          | ' GRFx Difference Between 0th & 4th order moment' |
| 79 | ' GRFz Waveform length cD6'                       | ' GRFy Mean absolute value D8'    | ' GRFy Auto regressive 1'               | ' GRFx Sigma(signal entropy)'                     |
| 80 | ' GRFy Wavelet entropy level 8'                   | ' GRFy Waveform length D4'        | ' GRFz Wavelet entropy level 8'         | ' GRFx Difference absolute standard deviation '   |
| 81 | ' GRFz Willison amplitude'                        | ' GRFz Waveform length cA8'       | ' GRFz Max/min ratio'                   | 'GRFy Max Fractal length cA8'                     |
| 82 | ' GRFz Mean absolute value D2'                    | ' GRFz Mean frequency '           | ' GRFy Waveform length ratio'           | ' GRFx Band power of cD8'                         |
| 83 | ' GRFx Mean absolute value cD1'                   | ' GRFy Band power of D2'          | ' GRFy Wavelet entropy level 4'         | ' GRFy Band power of D4'                          |
| 84 | ' GRFy LOC of first peak'                         | ' GRFx Standard Deviation D4'     | ' GRFz Max Fractal length A6'           | ' GRFx Max Fractal length cD7'                    |
| 85 | ' GRFy Mean absolute value A8'                    | ' GRFz Waveform length D1'        | ' GRFx Sparseness'                      | ' GRFz Zero crossing'                             |
| 86 | ' GRFz Average amplitude change'                  | ' GRFx Max/min ratio'             | ' GRFx Auto regressive 1'               | ' GRFx Median frequency '                         |
| 87 | ' GRFy tandard Deviation D7'                      | ' GRFx Band power of D5'          | ' GRFx Mean frequency '                 | 'GRFz Wave form length'                           |
| 88 | ' GRFz Max Fractal length cD2'                    | ' GRFz Quantile range'            | ' GRFx Waveform length ratio'           | ' GRFz Spectral flux'                             |

|     |                                 |                                     |                                        |                                  |
|-----|---------------------------------|-------------------------------------|----------------------------------------|----------------------------------|
| 89  | 'GRFx RMS D7'                   | 'GRFy Band power of cD7'            | 'GRFy Auto regressive 4'               | 'GRFx Peak to Peak'              |
| 90  | 'GRFz Standard Deviation cD5'   | 'GRFx Max Fractal length cD3'       | 'GRFy Max Fractal length D2'           | 'GRFx Standard Deviation cD4'    |
| 91  | 'GRFx Mean absolute Value'      | 'GRFx Enhanced mean Absolute Value' | 'GRFx Final/min'                       | 'GRFy Mean absolute value cD3'   |
| 92  | 'GRFx Waveform length cD6'      | 'GRFx Wavelet entropy level 6'      | 'GRFy Max Fractal length cD4'          | 'GRFx Descriptor SE Upper Bound' |
| 93  | 'GRFx Standard Deviation A6'    | 'GRFy Waveform length D8'           | 'GRFy Mean'                            | 'GRFy Standard Deviation cD3'    |
| 94  | 'GRFy RMS cD2'                  | 'GRFx Auto regressive 1'            | 'GRFz Signal to noise ratio ,          | 'GRFx RMS D8'                    |
| 95  | 'GRFz Mean absolute value D6'   | 'GRFz standard Deviation D7'        | 'GRFz Third quantile'                  | 'GRFz Mean'                      |
| 96  | 'GRFx Sigma(signal entropy)'    | 'GRFz Log detector'                 | 'GRFx Auto regressive 3'               | 'GRFy RMS cD5'                   |
| 97  | 'GRFz Waveform length D7'       | 'GRFx Waveform length D2'           | 'GRFz Zero crossing'                   | 'GRFz Max Fractal length cD6'    |
| 98  | 'GRFy Average amplitude change' | 'GRFx RMS cD6'                      | 'GRFy Max Fractal length cD2'          | 'GRFx Max Fractal length A6'     |
| 99  | 'GRFz Auto regressive 1'        | 'GRFy Max Fractal length cD5'       | 'GRFy Spectral crest'                  | 'GRFy Waveform length cD7'       |
| 100 | 'GRFx Peak to Peak'             | 'GRFz Slope sign change'            | 'GRFy Signal to noise ratio '          | 'GRFx Band power of cD5'         |
| 101 | 'GRFx Mean absolute value cD8'  | 'GRFz Spectral decrease'            | 'GRFx Second peak'                     | 'GRFy Standard Deviation A6'     |
| 102 | 'GRFx Waveform length cD1'      | 'GRFz Standard Deviation cD7'       | 'GRFz Waveform length ratio'           | 'GRFy Mean absolute value cD6'   |
| 103 | 'GRFx Wavelet entropy level 8'  | 'GRFx Standard Deviation cD1'       | 'GRFx Signal to motion artifact ratio' | 'GRFz Wavelet entropy level 6'   |
| 104 | 'GRFz Band power of D7'         | 'GRFz RMS cA8'                      | 'GRFx Wavelet entropy level 4'         | 'GRFy Standard Deviation'        |
| 105 | 'GRFz RMS cD3'                  | 'GRFx Waveform length ratio'        | 'GRFy Waveform length cD2'             | 'GRFy Shape factor'              |
| 106 | 'GRFy LOC of second peak'       | 'GRFx PS kurtosis'                  | 'GRFx PS kurtosis'                     | 'GRFz Waveform length cD6'       |
| 107 | 'GRFy RMS cD6'                  | 'GRFx RMS A6'                       | 'GRFx Auto regressive 2'               | 'GRFx Mean absolute value cD7'   |
| 108 | 'GRFz Shape factor'             | 'GRFz Max Fractal length cD3'       | 'GRFz Sparseness'                      | 'GRFy Max Fractal length D4'     |
| 109 | 'GRFy Signal skewness'          | 'GRFy Zero crossing'                | 'GRFy Sigma(signal entropy)'           | 'GRFy Waveform length cD8'       |
| 110 | 'GRFx Mean absolute value D6'   | 'GRFx Signal skewness'              | 'GRFy Zero crossing'                   | 'GRFy First quantile'            |
| 111 | 'GRFx Standard Deviation cA8'   | 'GRFx Max Fractal length cD5'       | 'GRFx Max Fractal length cD4'          | 'GRFz Band power of cD5'         |
| 112 | 'GRFz Standard Deviation D6'    | 'GRFx Spectral centroid'            | 'GRFz Irregularity Factor'             | 'GRFy Mean absolute value cD1'   |
| 113 | 'GRFx Band power of cD4'        | 'GRFy Band power of cD2'            | 'GRFx Zero crossing'                   | 'GRFx RMS cD2'                   |

|     |                                   |                                         |                                                   |                                     |
|-----|-----------------------------------|-----------------------------------------|---------------------------------------------------|-------------------------------------|
| 114 | ' GRFy Descriptor SE Lower Bound' | ' GRFy Descriptor SE Upper Bound'       | ' GRFy Difference Between 0th & 4th order moment' | ' GRFx First peak '                 |
| 115 | ' GRFz RMS cD5'                   | ' GRFz Waveform length cD7'             | ' GRFy Myopluse percentage rate'                  | ' GRFz Mean absolute value cD6'     |
| 116 | ' GRFx RMS'                       | ' GRFy PS kurtosis'                     | ' GRFx Myopluse percentage rate'                  | ' GRFz Mean absolute Value'         |
| 117 | ' GRFx Spectral decrease'         | ' GRFx Coefficient of variation'        | ' GRFy Max ratio'                                 | ' GRFx Standard Deviation cD2'      |
| 118 | ' GRFx Max Fractal length D8'     | ' GRFy Max ratio'                       | ' GRFy Signal Kurtosis'                           | ' GRFz Max Fractal length D8'       |
| 119 | ' GRFy Max Fractal length A6'     | ' GRFy Standard Deviation D8'           | ' GRFy Wavelet entropy level 6'                   | ' GRFy Spectral flux'               |
| 120 | ' GRFx Integrated absolute value' | ' GRFx Signal to motion artifact ratio' | ' GRFy Max Fractal length cD1'                    | ' GRFz Max Fractal length cD2'      |
| 121 | ' GRFy RMS cD8'                   | ' GRFz Willison amplitude'              | ' GRFy Spectral roll off point '                  | ' GRFx Standard Deviation cD1'      |
| 122 | ' GRFz Standard Deviation D1'     | ' GRFy Waveform length A8'              | ' GRFx Irregularity Factor'                       | ' GRFx Waveform length cD4'         |
| 123 | ' GRFz Peak to Peak'              | ' GRFy Standard Deviation D4'           | ' GRFy Auto regressive 3'                         | ' GRFx Powe spectral (PS) skewness' |
| 124 | ' GRFy Max Fractal length D8'     | ' GRFz Waveform length D4'              | ' GRFx Spectral crest'                            | ' GRFz Standard Deviation D4'       |
| 125 | ' GRFx Descriptor SE Lower Bound' | ' GRFz RMS cD1'                         | ' GRFy Final/min'                                 | ' GRFy Max Fractal length cD4'      |
| 126 | ' GRFz RMS D6'                    | ' GRFx Standard Deviation D2'           | ' GRFy Sparseness'                                | ' GRFx Max Fractal length D2'       |
| 127 | ' GRFx Waveform length cA8'       | ' GRFz Mean absolute value A6'          | ' GRFy Irregularity Factor'                       | ' GRFz Spectral spread'             |
| 128 | ' GRFx Standard Deviation'        | ' GRFy Willison amplitude'              | ' GRFz Signal Kurtosis'                           | ' GRFz Standard Deviation D2'       |
| 129 | ' GRFz Waveform length cD8'       | ' GRFz Standard Deviation D5'           | ' GRFx Max frequency'                             | ' GRFx Band power of cD6'           |
| 130 | ' GRFy Enhanced Wave form length' | ' GRFz RMS cD4'                         |                                                   | ' GRFy Standard Deviation cD8'      |
| 131 | ' GRFz Mean absolute value D3'    | ' GRFz Auto regressive 4'               |                                                   | ' GRFy Average power'               |
| 132 | ' GRFx Band power of cD5'         | ' GRFy Time to peak'                    |                                                   | ' GRFy Maximum Fractal length'      |
| 133 |                                   | ' GRFx Band power of D7'                |                                                   | ' GRFx Max ratio'                   |
| 134 |                                   | ' GRFz Max Fractal length D4'           |                                                   | ' GRFz Wavelet entropy level 8'     |
| 135 |                                   | ' GRFy Standard Deviation D1'           |                                                   | ' GRFx Spectral flatness'           |
| 136 |                                   | ' GRFx Max Fractal length D7'           |                                                   | ' GRFy Band power of D7'            |
| 137 |                                   | ' GRFy RMS D4'                          |                                                   | ' GRFz PS median frequency'         |
| 138 |                                   | ' GRFz Waveform length cD8'             |                                                   | ' GRFx Spectral kurtosis'           |

139

' GRFx Max Fractal  
length D6'**Table S24.** Performance evaluation matrix using features from GRFx for different feature selection techniques.

| A Chi Square feature Ranking Technique     |              |               |                 |              |      |
|--------------------------------------------|--------------|---------------|-----------------|--------------|------|
| Incremental combination of Ranked features | Accuracy (%) | Precision (%) | Sensitivity (%) | F1-Score (%) | AUC  |
| Top 30                                     | 89.47        | 90.58         | 89.47           | 89.34        | 0.85 |
| Top 31                                     | 92.11        | 93.20         | 92.11           | 92.01        | 0.87 |
| Top 32                                     | 90.79        | 91.53         | 90.79           | 90.72        | 0.86 |
| Top 33                                     | 86.84        | 87.95         | 86.84           | 86.89        | 0.83 |
| Top 34                                     | 90.79        | 92.35         | 90.79           | 90.63        | 0.86 |
| Top 35                                     | 90.79        | 91.08         | 90.79           | 90.59        | 0.87 |
| Top 36                                     | 89.47        | 90.03         | 89.47           | 89.20        | 0.85 |
| Top 37                                     | 89.47        | 89.57         | 89.47           | 89.33        | 0.86 |
| Top 38                                     | 97.37        | 97.41         | 97.37           | 97.36        | 0.98 |
| Top 39                                     | 94.74        | 95.16         | 94.74           | 94.78        | 0.94 |
| B mrmr feature Ranking Technique           |              |               |                 |              |      |
| Incremental combination of Ranked features | Accuracy (%) | Precision (%) | Sensitivity (%) | F1-Score (%) | AUC  |
| Top 45                                     | 93.42        | 93.36         | 93.42           | 93.37        | 0.91 |
| Top 46                                     | 89.47        | 89.43         | 89.47           | 89.27        | 0.86 |
| Top 47                                     | 93.42        | 93.54         | 93.42           | 93.32        | 0.93 |
| Top 48                                     | 90.79        | 91.04         | 90.79           | 90.57        | 0.88 |
| Top 49                                     | 90.79        | 91.03         | 90.79           | 90.52        | 0.87 |
| Top 50                                     | 96.05        | 96.28         | 96.05           | 96.05        | 0.98 |
| Top 51                                     | 94.74        | 95.08         | 94.74           | 94.79        | 0.94 |
| Top 52                                     | 86.84        | 86.76         | 86.84           | 86.72        | 0.85 |
| Top 53                                     | 90.79        | 91.35         | 90.79           | 90.78        | 0.91 |
| Top 54                                     | 92.11        | 92.05         | 92.11           | 92.05        | 0.90 |
| C relieff feature Ranking Technique        |              |               |                 |              |      |
| Incremental combination of Ranked features | Accuracy (%) | Precision (%) | Sensitivity (%) | F1-Score (%) | AUC  |
| Top 10                                     | 88.16        | 88.24         | 88.16           | 88.18        | 0.86 |
| Top 11                                     | 86.84        | 87.08         | 86.84           | 86.93        | 0.85 |
| Top 12                                     | 89.47        | 89.67         | 89.47           | 89.51        | 0.89 |
| Top 13                                     | 89.47        | 90.04         | 89.47           | 89.57        | 0.91 |
| Top 14                                     | 97.37        | 97.41         | 97.37           | 97.36        | 0.98 |
| Top 15                                     | 97.37        | 97.51         | 97.37           | 97.37        | 0.98 |
| Top 16                                     | 93.42        | 93.71         | 93.42           | 93.41        | 0.92 |
| Top 17                                     | 90.79        | 90.80         | 90.79           | 90.70        | 0.88 |
| Top 18                                     | 94.74        | 94.89         | 94.74           | 94.75        | 0.95 |
| Top 19                                     | 94.74        | 94.89         | 94.74           | 94.75        | 0.95 |
| D fscnca feature Ranking Technique         |              |               |                 |              |      |



| Incremental<br>combination of Ranked<br>features | Accuracy (%) | Precision (%) | Sensitivity (%) | F1-Score (%) | AUC  |
|--------------------------------------------------|--------------|---------------|-----------------|--------------|------|
| Top 15                                           | 93.42        | 93.50         | 93.42           | 93.36        | 0.92 |
| Top 16                                           | 94.74        | 94.89         | 94.74           | 94.75        | 0.93 |
| Top 17                                           | 94.74        | 94.83         | 94.74           | 94.67        | 0.92 |
| Top 18                                           | 93.42        | 93.91         | 93.42           | 93.30        | 0.90 |
| Top 19                                           | 98.68        | 98.72         | 98.68           | 98.68        | 1.00 |
| Top 20                                           | 94.74        | 94.71         | 94.74           | 94.70        | 0.94 |
| Top 21                                           | 93.42        | 93.42         | 93.42           | 93.42        | 0.94 |
| Top 22                                           | 92.11        | 92.09         | 92.11           | 92.07        | 0.90 |
| Top 23                                           | 96.05        | 96.05         | 96.05           | 96.05        | 0.97 |
| Top 24                                           | 97.37        | 97.41         | 97.37           | 97.36        | 0.98 |

**Table S25.** Performance evaluation matrix using features from GRFy muscle EMG for different feature selection techniques.

| A Chi Square feature Ranking Technique           |              |               |                 |              |      |
|--------------------------------------------------|--------------|---------------|-----------------|--------------|------|
| Incremental<br>combination of<br>Ranked features | Accuracy (%) | Precision (%) | Sensitivity (%) | F1-Score (%) | AUC  |
| Top 10                                           | 90.79        | 91.19         | 90.79           | 90.80        | 0.94 |
| Top 11                                           | 88.16        | 88.57         | 88.16           | 88.29        | 0.88 |
| Top 12                                           | 85.53        | 86.00         | 85.53           | 85.59        | 0.87 |
| Top 13                                           | 84.21        | 84.98         | 84.21           | 84.29        | 0.85 |
| Top 14                                           | 88.16        | 88.60         | 88.16           | 88.19        | 0.90 |
| Top 15                                           | 92.11        | 92.28         | 92.11           | 92.11        | 0.95 |
| Top 16                                           | 84.21        | 84.98         | 84.21           | 84.29        | 0.88 |
| Top 17                                           | 82.89        | 83.01         | 82.89           | 82.82        | 0.89 |
| Top 18                                           | 86.84        | 86.87         | 86.84           | 86.80        | 0.88 |
| Top 19                                           | 84.21        | 84.51         | 84.21           | 84.22        | 0.84 |
| B mrmr feature Ranking Technique                 |              |               |                 |              |      |
| Incremental<br>combination of Ranked<br>features | Accuracy (%) | Precision (%) | Sensitivity (%) | F1-Score (%) | AUC  |
| Top 30                                           | 82.89        | 83.19         | 82.89           | 82.94        | 0.89 |
| Top 31                                           | 80.26        | 80.46         | 80.26           | 80.28        | 0.85 |
| Top 32                                           | 81.58        | 81.94         | 81.58           | 81.61        | 0.86 |
| Top 33                                           | 84.21        | 84.85         | 84.21           | 84.27        | 0.86 |
| Top 34                                           | 86.84        | 87.26         | 86.84           | 86.78        | 0.89 |
| Top 35                                           | 78.95        | 80.31         | 78.95           | 79.07        | 0.84 |
| Top 36                                           | 82.89        | 82.95         | 82.89           | 82.90        | 0.86 |
| Top 37                                           | 84.21        | 84.51         | 84.21           | 84.22        | 0.85 |
| Top 38                                           | 81.58        | 82.14         | 81.58           | 81.54        | 0.90 |
| Top 39                                           | 81.58        | 83.91         | 81.58           | 81.64        | 0.85 |
| C relieff feature Ranking Technique              |              |               |                 |              |      |
| Incremental<br>combination of Ranked<br>features | Accuracy (%) | Precision (%) | Sensitivity (%) | F1-Score (%) | AUC  |
| Top 15                                           | 88.16        | 89.51         | 88.16           | 88.18        | 0.91 |

| D                                          |              |               |                 |              |      |
|--------------------------------------------|--------------|---------------|-----------------|--------------|------|
| fscnca feature Ranking Technique           |              |               |                 |              |      |
| Incremental combination of Ranked features | Accuracy (%) | Precision (%) | Sensitivity (%) | F1-Score (%) | AUC  |
| Top 16                                     | 89.47        | 90.64         | 89.47           | 89.62        | 0.91 |
| Top 17                                     | 89.47        | 91.24         | 89.47           | 89.62        | 0.91 |
| Top 18                                     | 90.79        | 92.08         | 90.79           | 90.91        | 0.92 |
| Top 19                                     | 92.11        | 93.86         | 92.11           | 92.22        | 0.95 |
| Top 20                                     | 89.47        | 91.24         | 89.47           | 89.62        | 0.91 |
| Top 21                                     | 93.42        | 94.32         | 93.42           | 93.40        | 0.96 |
| Top 22                                     | 92.11        | 92.98         | 92.11           | 92.20        | 0.92 |
| Top 23                                     | 90.79        | 91.36         | 90.79           | 90.88        | 0.91 |
| Top 24                                     | 89.47        | 90.39         | 89.47           | 89.60        | 0.89 |
| Top 20                                     | 89.47        | 89.50         | 89.47           | 89.43        | 0.89 |
| Top 21                                     | 92.11        | 92.30         | 92.11           | 92.00        | 0.89 |
| Top 22                                     | 90.79        | 91.03         | 90.79           | 90.56        | 0.87 |
| Top 23                                     | 89.47        | 89.83         | 89.47           | 89.11        | 0.84 |
| Top 24                                     | 94.74        | 94.75         | 94.74           | 94.72        | 0.95 |
| Top 25                                     | 94.74        | 94.89         | 94.74           | 94.75        | 0.94 |
| Top 26                                     | 93.42        | 93.53         | 93.42           | 93.45        | 0.93 |
| Top 27                                     | 88.16        | 88.11         | 88.16           | 88.05        | 0.85 |
| Top 28                                     | 92.11        | 92.27         | 92.11           | 92.12        | 0.91 |
| Top 29                                     | 92.11        | 92.58         | 92.11           | 92.06        | 0.89 |

**Table S26.** Performance evaluation matrix using features from GRFz muscle EMG for different feature selection techniques.

| A                                          |              |               |                 |              |      |
|--------------------------------------------|--------------|---------------|-----------------|--------------|------|
| Chi Square feature Ranking Technique       |              |               |                 |              |      |
| Incremental combination of Ranked features | Accuracy (%) | Precision (%) | Sensitivity (%) | F1-Score (%) | AUC  |
| Top 20                                     | 89.47        | 89.50         | 89.47           | 89.43        | 0.89 |
| Top 21                                     | 92.11        | 92.30         | 92.11           | 92.00        | 0.89 |
| Top 22                                     | 90.79        | 91.03         | 90.79           | 90.56        | 0.87 |
| Top 23                                     | 89.47        | 89.83         | 89.47           | 89.11        | 0.84 |
| Top 24                                     | 94.74        | 94.75         | 94.74           | 94.72        | 0.95 |
| Top 25                                     | 94.74        | 94.89         | 94.74           | 94.75        | 0.94 |
| Top 26                                     | 93.42        | 93.53         | 93.42           | 93.45        | 0.93 |
| Top 27                                     | 88.16        | 88.11         | 88.16           | 88.05        | 0.85 |
| Top 28                                     | 92.11        | 92.27         | 92.11           | 92.12        | 0.91 |
| Top 29                                     | 92.11        | 92.58         | 92.11           | 92.06        | 0.89 |
| B                                          |              |               |                 |              |      |
| mrmr feature Ranking Technique             |              |               |                 |              |      |
| Incremental combination of Ranked features | Accuracy (%) | Precision (%) | Sensitivity (%) | F1-Score (%) | AUC  |
| Top 10                                     | 88.16        | 88.26         | 88.16           | 88.15        | 0.88 |
| Top 11                                     | 86.84        | 86.94         | 86.84           | 86.68        | 0.87 |
| Top 12                                     | 89.47        | 89.66         | 89.47           | 89.42        | 0.88 |
| Top 13                                     | 90.79        | 90.77         | 90.79           | 90.76        | 0.91 |

|                                                  |              |               |                 |              |      |
|--------------------------------------------------|--------------|---------------|-----------------|--------------|------|
| Top 14                                           | 90.79        | 90.80         | 90.79           | 90.70        | 0.89 |
| Top 15                                           | 90.79        | 90.94         | 90.79           | 90.84        | 0.90 |
| Top 16                                           | 88.16        | 88.28         | 88.16           | 88.20        | 0.91 |
| Top 17                                           | 89.47        | 89.47         | 89.47           | 89.39        | 0.89 |
| Top 18                                           | 93.42        | 93.47         | 93.42           | 93.42        | 0.94 |
| Top 19                                           | 90.79        | 90.81         | 90.79           | 90.78        | 0.91 |
| <b>C</b>                                         |              |               |                 |              |      |
| relieff feature Ranking Technique                |              |               |                 |              |      |
| Incremental<br>combination of Ranked<br>features | Accuracy (%) | Precision (%) | Sensitivity (%) | F1-Score (%) | AUC  |
| Top 26                                           | 90.79        | 91.05         | 90.79           | 90.77        | 0.88 |
| Top 27                                           | 90.79        | 91.05         | 90.79           | 90.77        | 0.89 |
| Top 28                                           | 90.79        | 90.80         | 90.79           | 90.70        | 0.88 |
| Top 29                                           | 85.53        | 85.53         | 85.53           | 85.53        | 0.84 |
| Top 30                                           | 92.11        | 92.09         | 92.11           | 92.07        | 0.91 |
| Top 31                                           | 92.11        | 92.27         | 92.11           | 92.12        | 0.91 |
| Top 32                                           | 93.42        | 93.71         | 93.42           | 93.41        | 0.93 |
| Top 33                                           | 92.11        | 92.27         | 92.11           | 92.12        | 0.90 |
| Top 34                                           | 89.47        | 89.64         | 89.47           | 89.50        | 0.87 |
| Top 35                                           | 90.79        | 91.05         | 90.79           | 90.77        | 0.89 |
| <b>D</b>                                         |              |               |                 |              |      |
| fscnca feature Ranking Technique                 |              |               |                 |              |      |
| Incremental<br>combination of Ranked<br>features | Accuracy (%) | Precision (%) | Sensitivity (%) | F1-Score (%) | AUC  |
| Top 10                                           | 89.47        | 90.03         | 89.47           | 89.50        | 0.89 |
| Top 11                                           | 90.79        | 91.19         | 90.79           | 90.84        | 0.91 |
| Top 12                                           | 88.16        | 88.48         | 88.16           | 88.05        | 0.87 |
| Top 13                                           | 93.42        | 93.65         | 93.42           | 93.45        | 0.95 |
| Top 14                                           | 93.42        | 93.65         | 93.42           | 93.45        | 0.96 |
| Top 15                                           | 90.79        | 91.19         | 90.79           | 90.84        | 0.91 |
| Top 16                                           | 93.42        | 93.51         | 93.42           | 93.40        | 0.95 |
| Top 17                                           | 93.42        | 93.51         | 93.42           | 93.40        | 0.94 |
| Top 18                                           | 96.05        | 96.13         | 96.05           | 96.07        | 0.97 |
| Top 19                                           | 96.05        | 96.13         | 96.05           | 96.07        | 0.97 |

**Table S27.** Performance evaluation matrix using features from GRFx and GRFy muscles EMG for different feature selection techniques.

|                                                  |              |               |                 |              |      |
|--------------------------------------------------|--------------|---------------|-----------------|--------------|------|
| <b>A</b>                                         |              |               |                 |              |      |
| Chi Square feature Ranking Technique             |              |               |                 |              |      |
| Incremental<br>combination of Ranked<br>features | Accuracy (%) | Precision (%) | Sensitivity (%) | F1-Score (%) | AUC  |
| Top 10                                           | 90.79        | 90.95         | 90.79           | 90.85        | 0.89 |
| Top 11                                           | 89.47        | 90.30         | 89.47           | 89.48        | 0.90 |
| Top 12                                           | 90.79        | 90.94         | 90.79           | 90.71        | 0.92 |
| Top 13                                           | 92.11        | 92.18         | 92.11           | 92.08        | 0.92 |
| Top 14                                           | 93.42        | 94.32         | 93.42           | 93.40        | 0.96 |
| Top 15                                           | 92.11        | 92.18         | 92.11           | 92.08        | 0.96 |

|                                                  |                                   |               |                 |              |      |
|--------------------------------------------------|-----------------------------------|---------------|-----------------|--------------|------|
| Top 16                                           | 94.74                             | 95.00         | 94.74           | 94.78        | 0.95 |
| Top 17                                           | 96.05                             | 96.24         | 96.05           | 96.07        | 0.98 |
| Top 18                                           | 92.11                             | 92.28         | 92.11           | 92.11        | 0.95 |
| Top 19                                           | 93.42                             | 93.68         | 93.42           | 93.48        | 0.95 |
| Top 20                                           | 93.42                             | 93.47         | 93.42           | 93.42        | 0.95 |
| B                                                | mrmr feature Ranking Technique    |               |                 |              |      |
| Incremental<br>combination of Ranked<br>features | Accuracy (%)                      | Precision (%) | Sensitivity (%) | F1-Score (%) | AUC  |
| Top 85                                           | 96.05                             | 96.22         | 96.05           | 96.05        | 0.93 |
| Top 86                                           | 94.74                             | 95.09         | 94.74           | 94.73        | 0.91 |
| Top 87                                           | 97.37                             | 97.43         | 97.37           | 97.37        | 0.97 |
| Top 88                                           | 96.05                             | 96.22         | 96.05           | 96.05        | 0.94 |
| Top 89                                           | 96.05                             | 96.05         | 96.05           | 96.02        | 0.94 |
| Top 90                                           | 94.74                             | 94.86         | 94.74           | 94.72        | 0.94 |
| Top 91                                           | 94.74                             | 95.09         | 94.74           | 94.73        | 0.91 |
| Top 92                                           | 94.74                             | 94.83         | 94.74           | 94.67        | 0.91 |
| Top 93                                           | 94.74                             | 95.09         | 94.74           | 94.73        | 0.92 |
| Top 94                                           | 94.74                             | 95.09         | 94.74           | 94.73        | 0.91 |
| C                                                | relieff feature Ranking Technique |               |                 |              |      |
| Incremental<br>combination of Ranked<br>features | Accuracy (%)                      | Precision (%) | Sensitivity (%) | F1-Score (%) | AUC  |
| Top 10                                           | 84.21                             | 85.78         | 84.21           | 84.51        | 0.86 |
| Top 11                                           | 85.53                             | 86.21         | 85.53           | 85.61        | 0.83 |
| Top 12                                           | 92.11                             | 92.03         | 92.11           | 92.04        | 0.92 |
| Top 13                                           | 94.74                             | 94.73         | 94.74           | 94.70        | 0.94 |
| Top 14                                           | 92.11                             | 93.43         | 92.11           | 92.09        | 0.95 |
| Top 15                                           | 90.79                             | 91.19         | 90.79           | 90.80        | 0.93 |
| Top 16                                           | 92.11                             | 92.28         | 92.11           | 92.11        | 0.95 |
| Top 17                                           | 96.05                             | 96.07         | 96.05           | 96.04        | 0.99 |
| Top 18                                           | 90.79                             | 91.19         | 90.79           | 90.80        | 0.94 |
| Top 19                                           | 90.79                             | 91.08         | 90.79           | 90.85        | 0.92 |
| D                                                | fscnca feature Ranking Technique  |               |                 |              |      |
| Incremental<br>combination of Ranked<br>features | Accuracy (%)                      | Precision (%) | Sensitivity (%) | F1-Score (%) | AUC  |
| Top 20                                           | 96.05                             | 96.21         | 96.05           | 96.04        | 0.95 |
| Top 21                                           | 98.68                             | 98.74         | 98.68           | 98.69        | 1.00 |
| Top 22                                           | 97.37                             | 97.43         | 97.37           | 97.37        | 0.97 |
| Top 23                                           | 98.68                             | 98.74         | 98.68           | 98.68        | 0.98 |
| Top 24                                           | 100.00                            | 100.00        | 100.00          | 100.00       | 1.00 |
| Top 25                                           | 98.68                             | 98.74         | 98.68           | 98.68        | 0.98 |
| Top 26                                           | 97.37                             | 97.60         | 97.37           | 97.36        | 0.95 |
| Top 27                                           | 97.37                             | 97.47         | 97.37           | 97.33        | 0.96 |
| Top 28                                           | 97.37                             | 97.51         | 97.37           | 97.37        | 0.98 |
| Top 29                                           | 97.37                             | 97.47         | 97.37           | 97.33        | 0.95 |

**Table S28.** Performance evaluation matrix using features from GRFx and GRFz muscles EMG for different feature selection techniques.

| A Chi Square feature Ranking Technique     |              |               |                 |              |      |
|--------------------------------------------|--------------|---------------|-----------------|--------------|------|
| Incremental combination of Ranked features | Accuracy (%) | Precision (%) | Sensitivity (%) | F1-Score (%) | AUC  |
| Top 20                                     | 93.42        | 94.03         | 93.42           | 93.14        | 0.90 |
| Top 21                                     | 92.11        | 92.05         | 92.11           | 91.98        | 0.87 |
| Top 22                                     | 89.47        | 89.87         | 89.47           | 88.87        | 0.82 |
| Top 23                                     | 90.79        | 91.03         | 90.79           | 90.56        | 0.87 |
| Top 24                                     | 94.74        | 94.93         | 94.74           | 94.75        | 0.96 |
| Top 25                                     | 93.42        | 93.53         | 93.42           | 93.45        | 0.93 |
| Top 26                                     | 94.74        | 94.89         | 94.74           | 94.75        | 0.95 |
| Top 27                                     | 94.74        | 94.89         | 94.74           | 94.75        | 0.94 |
| Top 28                                     | 90.79        | 90.84         | 90.79           | 90.79        | 0.90 |
| Top 29                                     | 97.37        | 97.43         | 97.37           | 97.37        | 0.99 |
| B mrmr feature Ranking Technique           |              |               |                 |              |      |
| Incremental combination of Ranked features | Accuracy (%) | Precision (%) | Sensitivity (%) | F1-Score (%) | AUC  |
| Top 15                                     | 89.47        | 89.40         | 89.47           | 89.41        | 0.85 |
| Top 16                                     | 92.11        | 92.09         | 92.11           | 92.07        | 0.91 |
| Top 17                                     | 94.74        | 94.82         | 94.74           | 94.75        | 0.96 |
| Top 18                                     | 94.74        | 94.75         | 94.74           | 94.72        | 0.93 |
| Top 19                                     | 97.37        | 97.43         | 97.37           | 97.37        | 0.99 |
| Top 20                                     | 94.74        | 94.86         | 94.74           | 94.77        | 0.95 |
| Top 21                                     | 94.74        | 94.75         | 94.74           | 94.72        | 0.94 |
| Top 22                                     | 93.42        | 93.42         | 93.42           | 93.42        | 0.92 |
| Top 23                                     | 94.74        | 94.86         | 94.74           | 94.77        | 0.96 |
| Top 24                                     | 93.42        | 93.50         | 93.42           | 93.36        | 0.92 |
| C relieff feature Ranking Technique        |              |               |                 |              |      |
| Incremental combination of Ranked features | Accuracy (%) | Precision (%) | Sensitivity (%) | F1-Score (%) | AUC  |
| Top 40                                     | 93.42        | 93.48         | 93.42           | 93.36        | 0.92 |
| Top 41                                     | 98.68        | 98.72         | 98.68           | 98.68        | 1.00 |
| Top 42                                     | 97.37        | 97.41         | 97.37           | 97.36        | 0.98 |
| Top 43                                     | 96.05        | 96.21         | 96.05           | 96.04        | 0.96 |
| Top 44                                     | 96.05        | 96.05         | 96.05           | 96.05        | 0.97 |
| Top 45                                     | 97.37        | 97.41         | 97.37           | 97.36        | 0.98 |
| Top 46                                     | 94.74        | 95.00         | 94.74           | 94.67        | 0.93 |
| Top 47                                     | 97.37        | 97.41         | 97.37           | 97.36        | 0.98 |
| Top 48                                     | 94.74        | 94.79         | 94.74           | 94.73        | 0.95 |
| Top 49                                     | 96.05        | 96.05         | 96.05           | 96.05        | 0.97 |
| D fscnca feature Ranking Technique         |              |               |                 |              |      |
| Incremental combination of Ranked features | Accuracy (%) | Precision (%) | Sensitivity (%) | F1-Score (%) | AUC  |
| Top 5                                      | 93.42        | 93.56         | 93.42           | 93.47        | 0.92 |

|        |       |       |       |       |      |
|--------|-------|-------|-------|-------|------|
| Top 6  | 97.37 | 97.60 | 97.37 | 97.36 | 0.98 |
| Top 7  | 98.68 | 98.72 | 98.68 | 98.68 | 0.98 |
| Top 8  | 98.68 | 98.74 | 98.68 | 98.68 | 0.98 |
| Top 9  | 98.68 | 98.74 | 98.68 | 98.68 | 0.98 |
| Top 10 | 98.68 | 98.74 | 98.68 | 98.68 | 0.98 |
| Top 11 | 97.37 | 97.41 | 97.37 | 97.36 | 0.98 |
| Top 12 | 96.05 | 96.21 | 96.05 | 96.04 | 0.96 |
| Top 13 | 96.05 | 96.37 | 96.05 | 96.05 | 0.95 |
| Top 14 | 96.05 | 96.13 | 96.05 | 96.07 | 0.98 |

**Table S29.** Performance evaluation matrix using features from GRFy and GRFz muscles EMG for different feature selection techniques.

| A Chi Square feature Ranking Technique     |              |               |                 |              |      |
|--------------------------------------------|--------------|---------------|-----------------|--------------|------|
| Incremental combination of Ranked features | Accuracy (%) | Precision (%) | Sensitivity (%) | F1-Score (%) | AUC  |
| Top 1                                      | 88.16        | 89.21         | 88.16           | 88.34        | 0.87 |
| Top 2                                      | 89.47        | 89.29         | 89.47           | 89.27        | 0.85 |
| Top 3                                      | 94.74        | 94.83         | 94.74           | 94.67        | 0.92 |
| Top 4                                      | 85.53        | 85.76         | 85.53           | 85.51        | 0.85 |
| Top 5                                      | 88.16        | 88.30         | 88.16           | 88.21        | 0.86 |
| Top 6                                      | 92.11        | 92.48         | 92.11           | 92.22        | 0.92 |
| Top 7                                      | 92.11        | 92.20         | 92.11           | 92.13        | 0.91 |
| Top 8                                      | 89.47        | 89.59         | 89.47           | 89.51        | 0.89 |
| Top 9                                      | 88.16        | 88.16         | 88.16           | 88.16        | 0.87 |
| Top 10                                     | 86.84        | 87.37         | 86.84           | 87.04        | 0.86 |
| B mrmr feature Ranking Technique           |              |               |                 |              |      |
| Incremental combination of Ranked features | Accuracy (%) | Precision (%) | Sensitivity (%) | F1-Score (%) | AUC  |
| Top 40                                     | 92.11        | 92.20         | 92.11           | 92.13        | 0.93 |
| Top 41                                     | 90.79        | 91.24         | 90.79           | 90.86        | 0.91 |
| Top 42                                     | 96.05        | 96.05         | 96.05           | 96.05        | 0.97 |
| Top 43                                     | 90.79        | 91.59         | 90.79           | 90.90        | 0.93 |
| Top 44                                     | 90.79        | 90.83         | 90.79           | 90.79        | 0.90 |
| Top 45                                     | 86.84        | 87.01         | 86.84           | 86.87        | 0.86 |
| Top 46                                     | 89.47        | 89.40         | 89.47           | 89.41        | 0.88 |
| Top 47                                     | 88.16        | 88.59         | 88.16           | 88.23        | 0.88 |
| Top 48                                     | 89.47        | 89.59         | 89.47           | 89.51        | 0.90 |
| Top 49                                     | 90.79        | 91.08         | 90.79           | 90.85        | 0.92 |
| Top 50                                     | 93.42        | 93.42         | 93.42           | 93.42        | 0.93 |
| C relieff feature Ranking Technique        |              |               |                 |              |      |
| Incremental combination of Ranked features | Accuracy (%) | Precision (%) | Sensitivity (%) | F1-Score (%) | AUC  |
| Top 40                                     | 92.11        | 92.28         | 92.11           | 92.17        | 0.93 |
| Top 41                                     | 89.47        | 90.05         | 89.47           | 89.61        | 0.90 |
| Top 42                                     | 89.47        | 90.04         | 89.47           | 89.57        | 0.91 |
| Top 43                                     | 92.11        | 92.60         | 92.11           | 92.19        | 0.94 |

|                                                  |                                  |               |                 |              |      |
|--------------------------------------------------|----------------------------------|---------------|-----------------|--------------|------|
| Top 44                                           | 90.79                            | 91.13         | 90.79           | 90.88        | 0.92 |
| Top 45                                           | 94.74                            | 94.82         | 94.74           | 94.75        | 0.96 |
| Top 46                                           | 93.42                            | 93.68         | 93.42           | 93.48        | 0.95 |
| Top 47                                           | 92.11                            | 92.20         | 92.11           | 92.13        | 0.93 |
| Top 48                                           | 90.79                            | 91.13         | 90.79           | 90.88        | 0.91 |
| Top 49                                           | 90.79                            | 91.08         | 90.79           | 90.85        | 0.91 |
| Top 50                                           | 89.47                            | 89.59         | 89.47           | 89.51        | 0.89 |
| D                                                | fscnca feature Ranking Technique |               |                 |              |      |
| Incremental<br>combination of Ranked<br>features | Accuracy (%)                     | Precision (%) | Sensitivity (%) | F1-Score (%) | AUC  |
| Top 15                                           | 93.42                            | 93.47         | 93.42           | 93.42        | 0.96 |
| Top 16                                           | 94.74                            | 94.82         | 94.74           | 94.75        | 0.96 |
| Top 17                                           | 93.42                            | 93.68         | 93.42           | 93.46        | 0.95 |
| Top 18                                           | 93.42                            | 93.68         | 93.42           | 93.46        | 0.95 |
| Top 19                                           | 93.42                            | 93.42         | 93.42           | 93.42        | 0.93 |
| Top 20                                           | 98.68                            | 98.72         | 98.68           | 98.68        | 1.00 |
| Top 21                                           | 96.05                            | 96.13         | 96.05           | 96.07        | 0.97 |
| Top 22                                           | 94.74                            | 94.75         | 94.74           | 94.72        | 0.95 |
| Top 23                                           | 92.11                            | 92.20         | 92.11           | 92.13        | 0.93 |
| Top 24                                           | 92.11                            | 92.20         | 92.11           | 92.13        | 0.93 |
| Top 25                                           | 96.05                            | 96.13         | 96.05           | 96.03        | 0.98 |

**Table S30.** Performance evaluation matrix using features from GRFx, GRFy and GRFz muscles EMG for different feature selection techniques.

|                                                  |                                      |               |                 |              |      |
|--------------------------------------------------|--------------------------------------|---------------|-----------------|--------------|------|
| A                                                | Chi Square feature Ranking Technique |               |                 |              |      |
| Incremental<br>combination of Ranked<br>features | Accuracy (%)                         | Precision (%) | Sensitivity (%) | F1-Score (%) | AUC  |
| Top 110                                          | 93.42                                | 93.50         | 93.42           | 93.36        | 0.93 |
| Top 111                                          | 97.37                                | 97.41         | 97.37           | 97.36        | 1.00 |
| Top 112                                          | 93.42                                | 93.42         | 93.42           | 93.42        | 0.99 |
| Top 113                                          | 96.05                                | 96.20         | 96.05           | 96.02        | 1.00 |
| Top 114                                          | 97.37                                | 97.51         | 97.37           | 97.37        | 1.00 |
| Top 115                                          | 97.37                                | 97.51         | 97.37           | 97.37        | 1.00 |
| Top 116                                          | 98.68                                | 98.72         | 98.68           | 98.68        | 1.00 |
| Top 117                                          | 94.74                                | 94.75         | 94.74           | 94.72        | 1.00 |
| Top 118                                          | 93.42                                | 93.51         | 93.42           | 93.40        | 0.96 |
| Top 119                                          | 92.11                                | 92.15         | 92.11           | 92.10        | 0.97 |
| B                                                | mrmr feature Ranking Technique       |               |                 |              |      |
| Incremental<br>combination of Ranked<br>features | Accuracy (%)                         | Precision (%) | Sensitivity (%) | F1-Score (%) | AUC  |
| Top 60                                           | 96.05                                | 96.05         | 96.05           | 96.05        | 1.00 |
| Top 61                                           | 96.05                                | 96.05         | 96.05           | 96.05        | 0.99 |
| Top 62                                           | 94.74                                | 94.82         | 94.74           | 94.75        | 0.99 |
| Top 63                                           | 93.42                                | 93.42         | 93.42           | 93.42        | 1.00 |
| Top 64                                           | 98.68                                | 98.72         | 98.68           | 98.68        | 1.00 |
| Top 65                                           | 94.74                                | 94.82         | 94.74           | 94.75        | 0.99 |

|                                                  |                                   |               |                 |              |      |
|--------------------------------------------------|-----------------------------------|---------------|-----------------|--------------|------|
| Top 66                                           | 96.05                             | 96.13         | 96.05           | 96.07        | 1.00 |
| Top 67                                           | 93.42                             | 93.42         | 93.42           | 93.42        | 0.99 |
| Top 68                                           | 97.37                             | 97.43         | 97.37           | 97.37        | 1.00 |
| Top 69                                           | 97.37                             | 97.41         | 97.37           | 97.36        | 1.00 |
| C                                                | relieff feature Ranking Technique |               |                 |              |      |
| Incremental<br>combination of Ranked<br>features | Accuracy (%)                      | Precision (%) | Sensitivity (%) | F1-Score (%) | AUC  |
| Top 100                                          | 97.37                             | 97.43         | 97.37           | 97.37        | 0.99 |
| Top 101                                          | 96.05                             | 96.13         | 96.05           | 96.07        | 1.00 |
| Top 102                                          | 96.05                             | 96.24         | 96.05           | 96.07        | 0.99 |
| Top 103                                          | 96.05                             | 96.13         | 96.05           | 96.07        | 1.00 |
| Top 104                                          | 97.37                             | 97.41         | 97.37           | 97.36        | 1.00 |
| Top 105                                          | 97.37                             | 97.43         | 97.37           | 97.37        | 1.00 |
| Top 106                                          | 98.68                             | 98.72         | 98.68           | 98.68        | 1.00 |
| Top 107                                          | 94.74                             | 94.75         | 94.74           | 94.72        | 0.99 |
| Top 108                                          | 96.05                             | 96.13         | 96.05           | 96.07        | 0.97 |
| Top 109                                          | 96.05                             | 96.05         | 96.05           | 96.05        | 0.99 |
| Top 110                                          | 98.68                             | 98.72         | 98.68           | 98.68        | 1.00 |
| D                                                | fscnca feature Ranking Technique  |               |                 |              |      |
| Incremental<br>combination of Ranked<br>features | Accuracy (%)                      | Precision (%) | Sensitivity (%) | F1-Score (%) | AUC  |
| Top 15                                           | 97.37                             | 97.51         | 97.37           | 97.34        | 1.00 |
| Top 16                                           | 97.37                             | 97.51         | 97.37           | 97.34        | 1.00 |
| Top 17                                           | 94.74                             | 95.29         | 94.74           | 94.75        | 1.00 |
| Top 18                                           | 93.42                             | 93.64         | 93.42           | 93.43        | 1.00 |
| Top 19                                           | 97.37                             | 97.51         | 97.37           | 97.34        | 1.00 |
| Top 20                                           | 97.37                             | 97.51         | 97.37           | 97.34        | 1.00 |
| Top 21                                           | 98.68                             | 98.72         | 98.68           | 98.68        | 1.00 |
| Top 22                                           | 98.68                             | 98.72         | 98.68           | 98.68        | 1.00 |
| Top 23                                           | 98.68                             | 98.72         | 98.68           | 98.68        | 1.00 |
| Top 24                                           | 98.68                             | 98.72         | 98.68           | 98.68        | 1.00 |
| Top 25                                           | 98.68                             | 98.72         | 98.68           | 98.68        | 1.00 |
